# Supplementary material for: A new heterocyclic skeleton with highly tunable absorption/emission wavelength via H-bonding
Source: Royal Society of Chemistry journal article supplement (doi:10.1039/c5ra17755c), 2015-01-01
Supplement: c5ra17755c1.pdf [file c5ra17755c1.pdf]

## Supplementary information for

### **A new heterocyclic skeleton with highly tunable absorption/emission wavelength via H-bonding**

Olesya A. Tomashenko, Alexander F. Khlebnikov,\* Ivan P. Mosiagin, Mikhail S. Novikov, Elena V. Grachova, Julia R. Shakirova, Sergey P. Tunik\*

#### **Table of contents**

|                                 |     |
|---------------------------------|-----|
| Experimental details.....       | S2  |
| Photophysical data.....         | S3  |
| XR-diffraction experiments..... | S6  |
| NMR spectra .....               | S35 |
| Computational Details.....      | S58 |

## EXPERIMENTAL DETAILS

Numerous attempts to cyclize salts **3a,b**, ylides **4a,b** and **6** either by radical reactions ( $\text{Bu}_3\text{SnH}$ , AIBN, toluene or mixture acetonitrile/toluene, heating up to 90 °C, normal or slow addition of reagents) or by palladium-catalyzed reactions failed. Typical procedure for the cyclization under radical conditions is presented below. Typical procedure for the cyclization under palladium-catalysis is presented in the article (synthesis of the compounds **8**, **9a-c**).

### Cyclization of 1-(4-(2-bromophenyl)-1-methyl-2-phenyl-1*H*-pyrrol-3-yl)pyridin-1-ium iodide (**5b**).

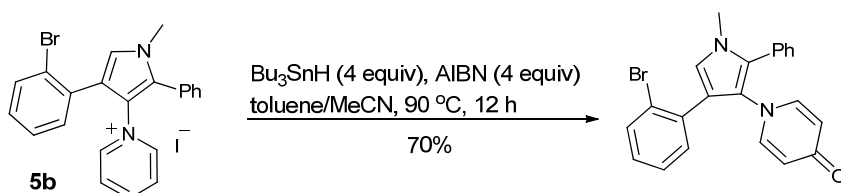

The pyridinium iodide **5b** didn't give any desired product under radical conditions. We were only able to isolate the unexpected product 1-(4-(2-bromophenyl)-1-methyl-2-phenyl-1*H*-pyrrol-3-yl)pyridin-4(1*H*)-one, which was shown to be the oxidized substrate **5b**. Traces of oxygen in the reaction mixture are the most probable oxidizer. Interestingly the iodide **5b** didn't give pyridin-4(1*H*)-one under reflux with AIBN in toluene/acetonitrile mixture in air.

To the solution of **5b** (245 mg, 0.47 mmol) in dry acetonitrile (20 mL) solution of  $\text{Bu}_3\text{SnH}$  (276 mg, 0.95 mmol, 2 equiv) and AIBN (156 mg, 0.95 mmol, 2 equiv) in toluene (10 mL) was added through syringe pump for 6 h at the atmosphere of argon at 90 °C. As TLC (DCM/MeOH 10:1) showed that there was still starting material, addition of  $\text{Bu}_3\text{SnH}$  and AIBN was repeated in the same manner. Then reaction mixture was filtered, evaporated to dryness and purified by column chromatography on silica gel (DCM/MeOH from 60:1 to 20:1) to obtain 1-(4-(2-bromophenyl)-1-methyl-2-phenyl-1*H*-pyrrol-3-yl)pyridin-4(1*H*)-one as solid, yield 133 mg, 70% (there are still some  $\text{Bu}_3\text{Sn}$ -species and it is difficult to remove them).  $^1\text{H}$  NMR ( $\text{CDCl}_3$ ):  $\delta$  3.32 (s, 3H), 6.16 (d,  $J = 7.7$  Hz, 2H), 6.83 (s, 1H), 7.07 (d,  $J = 7.7$  Hz, 2H), 7.12–7.19 (m, 2H), 7.19–7.30 (m, 3H), 7.37–7.44 (m, 3H), 7.57–7.64 (m, 1H).  $^{13}\text{C}$  NMR ( $\text{CDCl}_3$ ):  $\delta$  35.5 ( $\text{CH}_3$ ), 118.2 (CH), 118.4 (C), 121.2 (CH), 124.3 (C), 124.7 (C), 127.6 (CH), 128.2 (C), 128.5 (C), 128.7 (CH), 129.1 (CH), 129.1 (CH), 129.8 (CH), 131.8 (CH), 133.1 (C), 133.2 (CH), 141.8 (CH), 178.8 (C). HRMS (ESI)  $m/z$ : 405.0597 calcd for  $\text{C}_{22}\text{H}_{18}\text{BrN}_2\text{O}^+$  [ $\text{M} + \text{H}$ ] $^+$ , found 405.0609.

## PHOTOPHYSICAL DATA

All the photophysical measurements in solution were carried out in freshly distilled solvents (dichloromethane, acetonitrile, methanol, toluene). UV/Vis spectra were recorded on a UV-spectrometr. The emission and excitation spectra in solutions were measured with a spectrofluorimeter. The absolute emission quantum yields of the solutions were determined by a comparative method by using LED pumping and using coumarin 102 in ethanol ( $\Phi_r = 0.764$ ) as the reference with the refraction coefficients of dichloromethane, acetonitrile, methanol, toluene and ethanol equal to 1.42, 1.34, 1.33, 1.49 and 1.36, respectively. The following equation

$$\Phi_s = \Phi_r \frac{\eta_s^2 A_r I_s}{\eta_r^2 A_s I_r}$$

was used to calculate the quantum yield, where  $\Phi_s$  is the quantum yield of the sample,  $\Phi_r$  is the quantum yield of the reference,  $\eta$  is the refractive index of the solvent,  $A_s$  and  $A_r$  are the absorbance of the sample and the reference at the wavelength of excitation, respectively, and  $I_s$  and  $I_r$  are the integrated areas of emission bands<sup>1</sup>. Fluorescence lifetimes were determined by the TCSPC (Time-Correlated Single Photon Counting) method. The lifetime data were fit using the Jobin-Yvon software package and the Origin 8.1 program.

Figure S1 Absorption, Excitation and Emission spectra of **11** in different solvents.

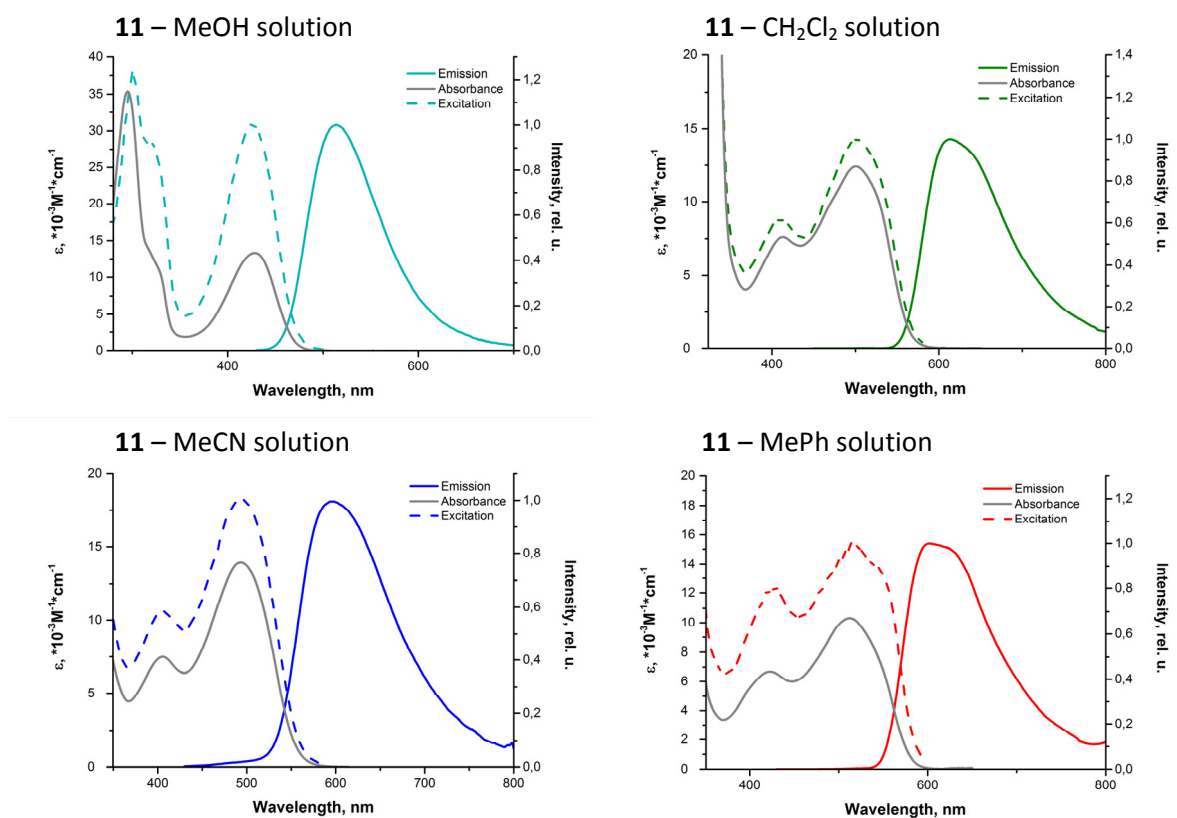

<sup>1</sup> K. Rurack and M. Spieles, *Anal. Chem.*, 2011, **83**, 1232–1242

Figure S2 Absorption, Excitation and Emission spectra of **12** in different solvents.

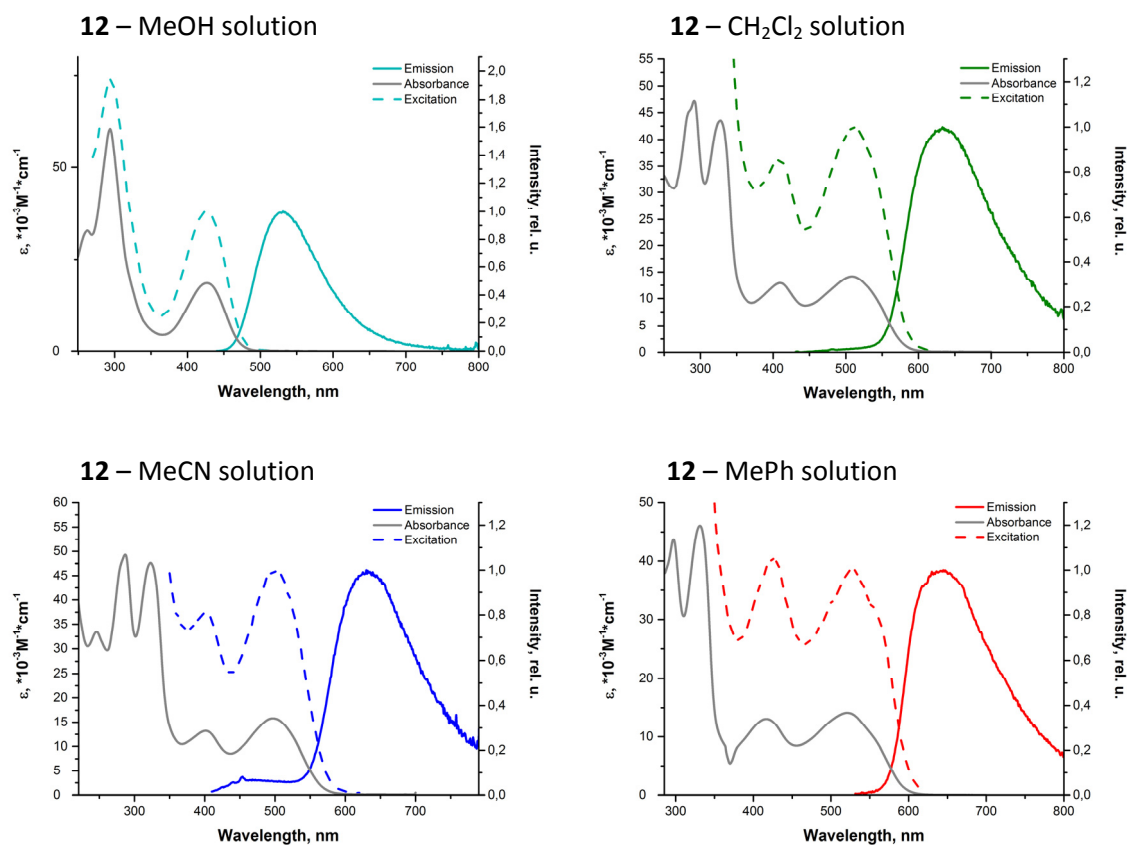

Figure S3 Absorption, Excitation and Emission spectra of **13** in different solvents.

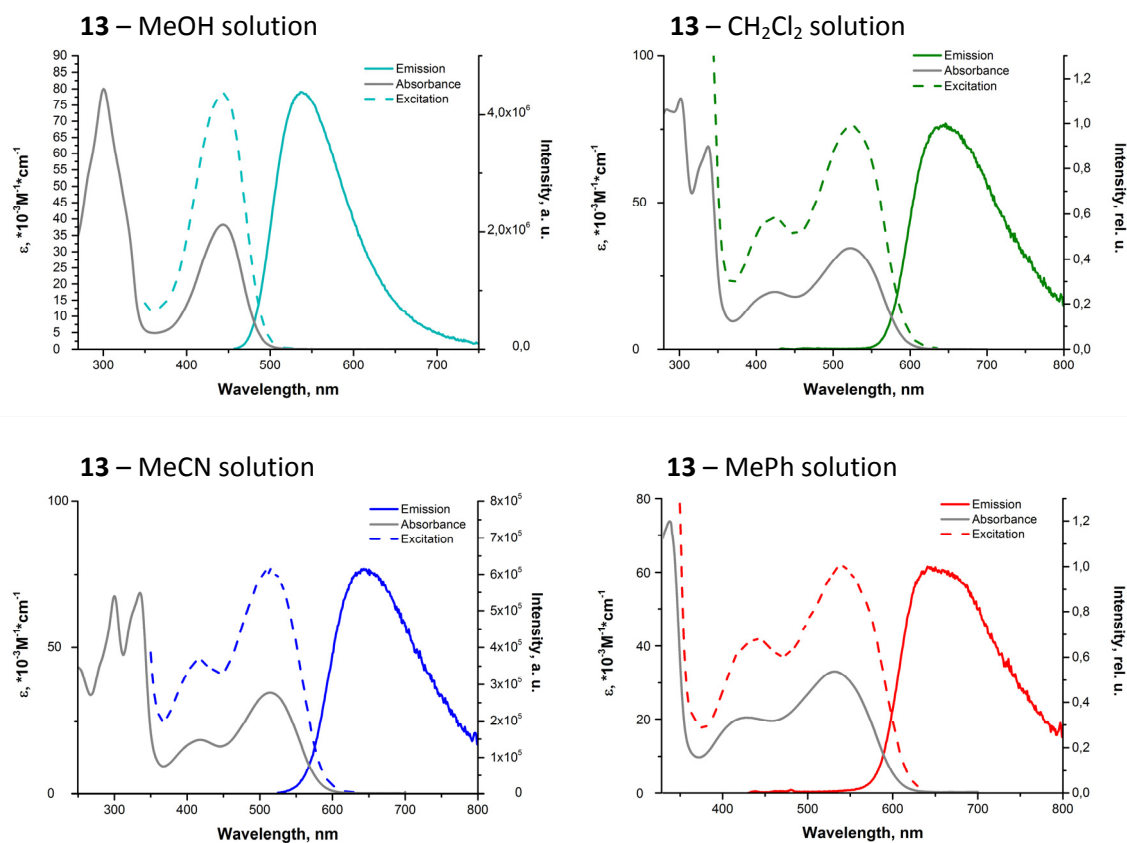



Figure S4 Absorbance and FL intensity of **11** in acetonitrile solution with different amounts of HCOOH (amount of **11** is  $6.4 \times 10^{-5}$  mmol)

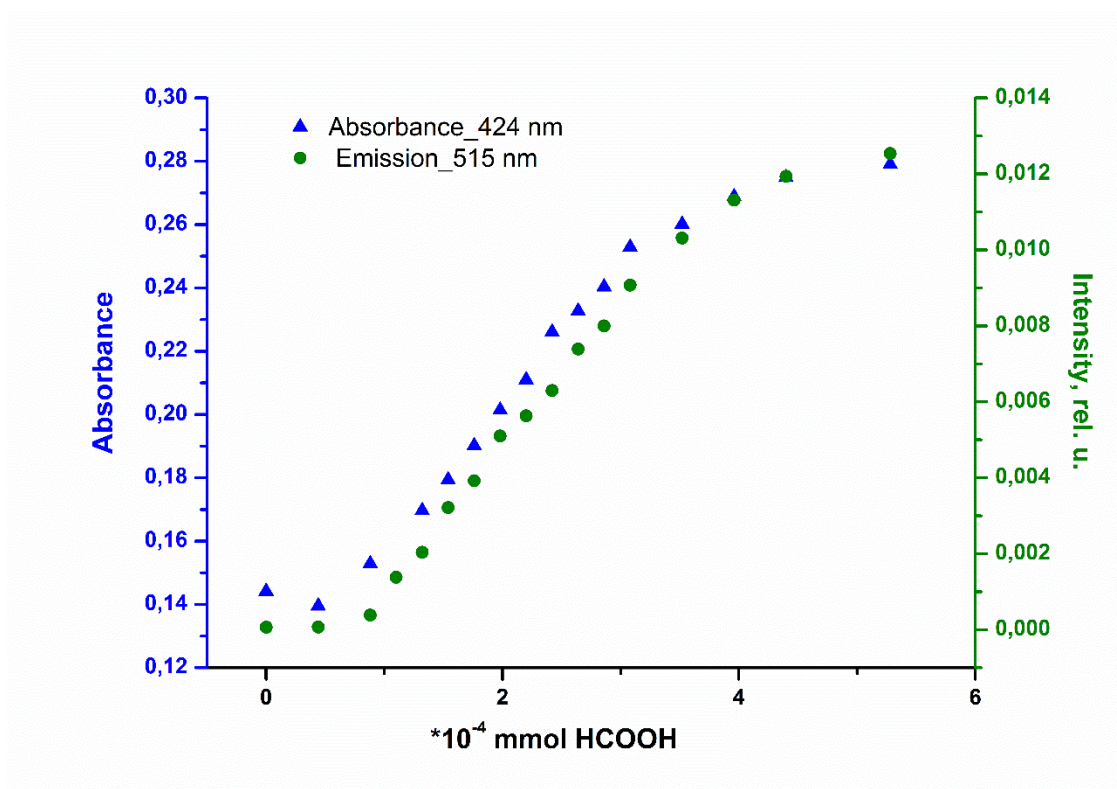

Figure S5 Titration of **11**•HCl in acetonitrile solution with different amounts of DBU (1,8-Diazabicycloundec-7-ene) (amount of **11**•HCl is  $5.29 \times 10^{-5}$  mmol)

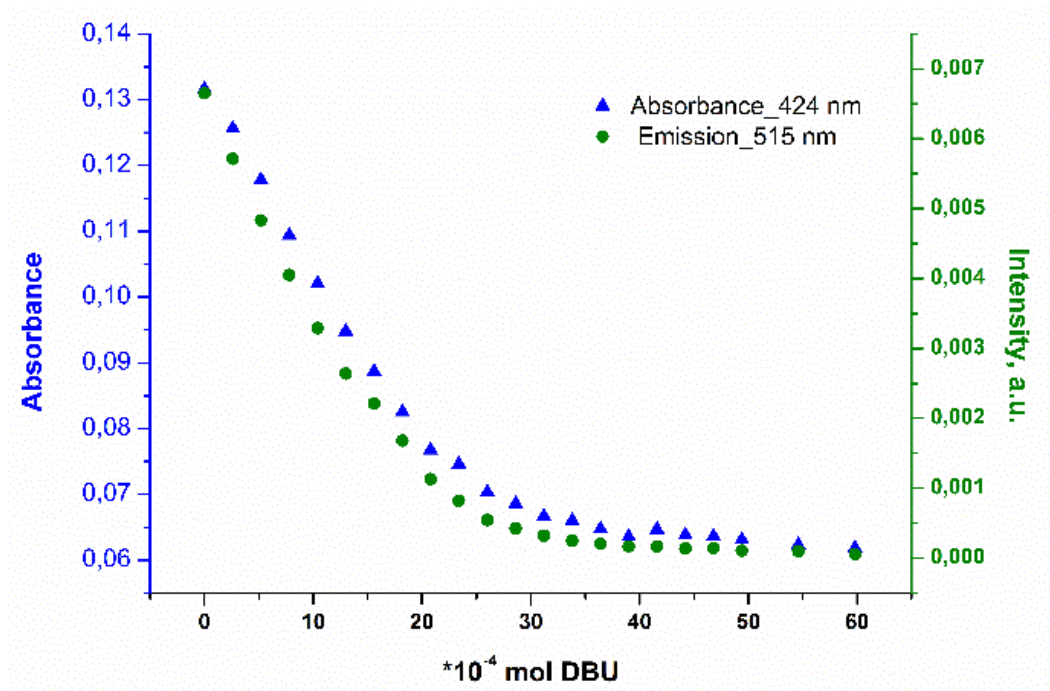

## X-RAY DIFFRACTION EXPERIMENTS

Crystal structures of **8**, **9a**, **11**, **13** were determined by single crystal X-ray diffraction analysis. A suitable crystal was selected and fixed on micro-mounts and the diffraction data were collected on a SuperNova, Dual, Cu at zero, Atlas diffractometer. The crystal was measured at a temperature of 100(2) K using monochromated MoK $\alpha$  radiation. The unit cell parameters and refinement characteristics of the crystal structures of **8**, **9a**, **11**, **13** are given below. Using Olex2<sup>2</sup>, the structures were solved with the ShelXS<sup>3</sup> structure solution program using Direct Methods and refined with the ShelXL<sup>2</sup> refinement package using Least Squares minimisation.

### 1-Methyl-3-phenyl-1*H*-pyrido[2,1-*a*]pyrrolo[3,2-*c*]isoquinolin-4-ium iodide (**8**)

Single crystals of **8** were growth from methanol/diethyl ether. CCDC for **8** is 1407108.

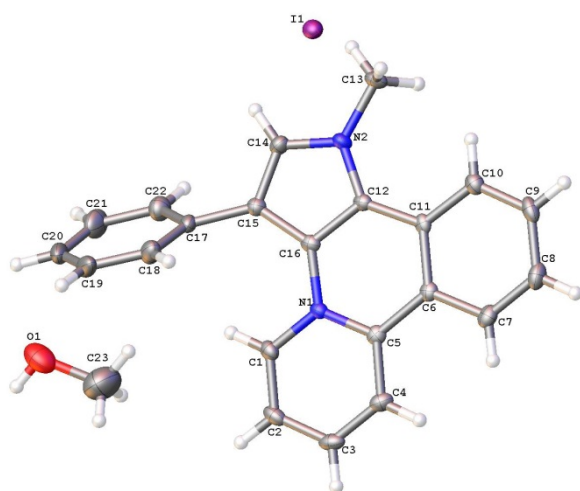

Molecular structure of compound **8**, displacement parameters are drawn at 50% probability level.

**Table S1 Crystal data and structure refinement for **8****

|                   |                                                   |
|-------------------|---------------------------------------------------|
| Empirical formula | C <sub>23</sub> H <sub>21</sub> IN <sub>2</sub> O |
| Formula weight    | 468.32                                            |
| Temperature/K     | 100(2)                                            |
| Crystal system    | monoclinic                                        |
| Space group       | C2/c                                              |
| a/Å               | 26.5184(9)                                        |
| b/Å               | 8.2523(2)                                         |
| c/Å               | 18.6675(5)                                        |
| $\alpha$ /°       | 90                                                |
| $\beta$ /°        | 106.173(3)                                        |
| $\gamma$ /°       | 90                                                |

<sup>2</sup> O. V. Dolomanov, L. J. Bourhis, R. J. Gildea, J. A. K. Howard and H. Puschmann, *J. Appl. Cryst.*, 2009, **42**, 339-341.

<sup>3</sup> G.M. Sheldrick, *Acta Cryst. A*, 2008, **64**, 112-122.

|                                             |                                                               |
|---------------------------------------------|---------------------------------------------------------------|
| Volume/Å <sup>3</sup>                       | 3923.5(2)                                                     |
| Z                                           | 8                                                             |
| ρ <sub>calc</sub> /cm <sup>3</sup>          | 1.586                                                         |
| μ/mm <sup>-1</sup>                          | 1.647                                                         |
| F(000)                                      | 1872.0                                                        |
| Crystal size/mm <sup>3</sup>                | 0.24 × 0.18 × 0.09                                            |
| Radiation                                   | MoKα (λ = 0.71073)                                            |
| 2Θ range for data collection/°              | 5.188 to 55                                                   |
| Index ranges                                | -34 ≤ h ≤ 32, -10 ≤ k ≤ 9, -24 ≤ l ≤ 21                       |
| Reflections collected                       | 11477                                                         |
| Independent reflections                     | 4420 [R <sub>int</sub> = 0.0279, R <sub>sigma</sub> = 0.0364] |
| Data/restraints/parameters                  | 4420/0/247                                                    |
| Goodness-of-fit on F <sup>2</sup>           | 1.046                                                         |
| Final R indexes [I >= 2σ (I)]               | R <sub>1</sub> = 0.0274, wR <sub>2</sub> = 0.0565             |
| Final R indexes [all data]                  | R <sub>1</sub> = 0.0343, wR <sub>2</sub> = 0.0598             |
| Largest diff. peak/hole / e Å <sup>-3</sup> | 0.49/-0.45                                                    |

**Table S2 Fractional Atomic Coordinates (×10<sup>4</sup>) and Equivalent Isotropic Displacement Parameters (Å<sup>2</sup>×10<sup>3</sup>) for 8. U<sub>eq</sub> is defined as 1/3 of the trace of the orthogonalised U<sub>ij</sub> tensor.**

| Atom | x          | y        | z          | U(eq)   |
|------|------------|----------|------------|---------|
| N1   | 6752.8(8)  | 1780(2)  | 3934.7(10) | 13.9(4) |
| N2   | 6897.7(8)  | -449(3)  | 5606.1(10) | 16.5(4) |
| C1   | 6346.4(10) | 2666(3)  | 3488.6(13) | 18.0(5) |
| C2   | 6407.5(10) | 3549(3)  | 2900.7(13) | 20.2(5) |
| C3   | 6891.0(11) | 3541(3)  | 2748.4(13) | 21.2(6) |
| C4   | 7297.6(10) | 2667(3)  | 3195.3(13) | 19.2(5) |
| C5   | 7239.2(10) | 1767(3)  | 3804.2(13) | 15.2(5) |
| C6   | 7666.5(9)  | 868(3)   | 4301.0(12) | 15.0(5) |
| C7   | 8166.1(10) | 825(3)   | 4166.2(14) | 20.1(5) |
| C8   | 8571.1(10) | -46(3)   | 4616.7(14) | 23.7(6) |
| C9   | 8498.8(10) | -894(3)  | 5225.9(14) | 22.4(6) |
| C10  | 8023.2(10) | -852(3)  | 5386.1(13) | 18.7(5) |
| C11  | 7598.4(9)  | 30(3)    | 4933.0(12) | 14.3(5) |
| C12  | 7087.2(9)  | 133(3)   | 5039.7(12) | 14.0(5) |
| C13  | 7163.6(10) | -1421(3) | 6257.7(13) | 20.0(5) |
| C14  | 6375.8(9)  | -89(3)   | 5442.7(12) | 17.7(5) |
| C15  | 6204.7(10) | 710(3)   | 4778.4(12) | 16.0(5) |
| C16  | 6666.4(9)  | 888(3)   | 4532.2(12) | 14.6(5) |
| C17  | 5645.8(10) | 1123(3)  | 4432.3(13) | 18.0(5) |
| C18  | 5379.7(11) | 522(4)   | 3730.2(14) | 28.1(6) |
| C19  | 4854.2(11) | 886(4)   | 3418.6(15) | 37.4(8) |

|     |            |           |            |          |
|-----|------------|-----------|------------|----------|
| C20 | 4591.7(12) | 1848(4)   | 3793.9(18) | 39.0(8)  |
| C21 | 4848.5(12) | 2411(4)   | 4497.1(18) | 38.5(8)  |
| C22 | 5371.9(11) | 2050(3)   | 4818.9(16) | 27.2(6)  |
| O1  | 4373.3(9)  | 5807(3)   | 3530.2(12) | 45.3(6)  |
| C23 | 4888.9(17) | 6051(6)   | 3487(2)    | 70.2(13) |
| II  | 6508.1(2)  | 1576.2(2) | 7634.1(2)  | 20.11(6) |

**Table S3 Anisotropic Displacement Parameters ( $\text{\AA}^2 \times 10^3$ ) for 8. The Anisotropic displacement factor exponent takes the form:  $-2\pi^2[h^2a^{*2}U_{11}+2hka^*b^*U_{12}+\dots]$ .**

| Atom | $U_{11}$  | $U_{22}$  | $U_{33}$ | $U_{23}$ | $U_{13}$ | $U_{12}$  |
|------|-----------|-----------|----------|----------|----------|-----------|
| N1   | 16.6(11)  | 11.3(10)  | 12.2(9)  | -0.6(8)  | 1.4(8)   | -1.3(8)   |
| N2   | 18.4(11)  | 17.0(11)  | 12.8(9)  | 2.2(8)   | 2.1(8)   | 1.3(9)    |
| C1   | 18.2(13)  | 15.2(13)  | 17.1(11) | -0.8(10) | -0.9(10) | -1.6(10)  |
| C2   | 26.1(15)  | 14.1(13)  | 15.3(11) | 0.1(10)  | -2.7(10) | 0(1)      |
| C3   | 33.5(16)  | 16.1(14)  | 14.0(11) | -0.6(10) | 6.3(11)  | -7.6(11)  |
| C4   | 27.0(15)  | 15.3(13)  | 17.5(12) | -3.4(10) | 9.9(11)  | -4.3(11)  |
| C5   | 18.7(13)  | 11.1(12)  | 15.6(11) | -5.5(9)  | 4.4(10)  | -2.2(9)   |
| C6   | 16.6(13)  | 11.3(12)  | 16.2(11) | -4.7(9)  | 3.2(10)  | -3.0(9)   |
| C7   | 19.2(14)  | 16.5(13)  | 25.3(13) | -5.2(11) | 7.5(11)  | -5.2(10)  |
| C8   | 15.9(13)  | 21.6(15)  | 33.9(14) | -6.9(12) | 7.6(11)  | -1.5(11)  |
| C9   | 16.3(14)  | 17.3(14)  | 27.6(13) | -4.4(11) | -4.0(11) | 1.6(10)   |
| C10  | 18.8(14)  | 16.5(13)  | 18.6(12) | -2.8(10) | 1.4(10)  | -0.6(10)  |
| C11  | 13.9(12)  | 11.1(12)  | 15.5(11) | -5.2(9)  | 0.0(9)   | -1.5(9)   |
| C12  | 17.7(13)  | 11.1(12)  | 12(1)    | -2.3(9)  | 2.2(9)   | -3.3(9)   |
| C13  | 25.2(14)  | 18.3(14)  | 14.2(11) | 3.9(10)  | 2(1)     | 0.4(11)   |
| C14  | 17.8(13)  | 19.5(14)  | 16.9(11) | -1.2(10) | 6.5(10)  | -2.9(10)  |
| C15  | 18.4(13)  | 13.4(13)  | 15.8(11) | -1.4(9)  | 4.2(10)  | -1.2(10)  |
| C16  | 19.4(13)  | 11.0(12)  | 12.2(10) | -2.9(9)  | 2.1(9)   | -2.3(9)   |
| C17  | 13.6(13)  | 19.2(13)  | 20.7(12) | 4.3(10)  | 4.1(10)  | -1.4(10)  |
| C18  | 21.1(15)  | 40.7(18)  | 21.3(13) | -0.3(12) | 3.9(11)  | -7.1(13)  |
| C19  | 22.5(16)  | 62(2)     | 22.4(14) | 12.8(15) | -2.2(12) | -16.3(15) |
| C20  | 15.5(15)  | 54(2)     | 44.8(18) | 28.2(17) | 4.5(13)  | 1.6(14)   |
| C21  | 24.4(17)  | 40(2)     | 54(2)    | 8.7(16)  | 16.5(15) | 9.3(14)   |
| C22  | 23.3(15)  | 26.8(16)  | 31.8(14) | 0.6(12)  | 8.2(12)  | 2.0(12)   |
| O1   | 50.4(16)  | 33.9(14)  | 42.8(13) | 5.1(11)  | -1.7(11) | 4.2(11)   |
| C23  | 67(3)     | 79(3)     | 72(3)    | 17(2)    | 31(2)    | -3(2)     |
| II   | 20.35(10) | 18.53(10) | 20.08(9) | 2.04(7)  | 3.35(7)  | -3.43(7)  |

**Table S4 Bond Lengths for 8.**

**Atom Atom Length/ $\text{\AA}$  Atom Atom Length/ $\text{\AA}$**

|    |     |          |     |     |          |
|----|-----|----------|-----|-----|----------|
| N1 | C1  | 1.375(3) | C9  | C10 | 1.375(3) |
| N1 | C5  | 1.378(3) | C10 | C11 | 1.409(3) |
| N1 | C16 | 1.407(3) | C11 | C12 | 1.427(3) |
| N2 | C12 | 1.377(3) | C12 | C16 | 1.393(3) |
| N2 | C13 | 1.463(3) | C14 | C15 | 1.366(3) |
| N2 | C14 | 1.364(3) | C15 | C16 | 1.430(3) |
| C1 | C2  | 1.364(3) | C15 | C17 | 1.482(3) |
| C2 | C3  | 1.389(4) | C17 | C18 | 1.395(4) |
| C3 | C4  | 1.370(4) | C17 | C22 | 1.388(4) |
| C4 | C5  | 1.402(3) | C18 | C19 | 1.385(4) |
| C5 | C6  | 1.452(3) | C19 | C20 | 1.370(5) |
| C6 | C7  | 1.416(3) | C20 | C21 | 1.380(5) |
| C6 | C11 | 1.422(3) | C21 | C22 | 1.383(4) |
| C7 | C8  | 1.369(4) | O1  | C23 | 1.406(4) |
| C8 | C9  | 1.393(4) |     |     |          |

**Table S5 Bond Angles for 8.**

| Atom | Atom | Atom | Angle/°    | Atom | Atom | Atom | Angle/°  |
|------|------|------|------------|------|------|------|----------|
| C1   | N1   | C5   | 120.8(2)   | C10  | C11  | C6   | 119.0(2) |
| C1   | N1   | C16  | 119.0(2)   | C10  | C11  | C12  | 125.4(2) |
| C5   | N1   | C16  | 120.2(2)   | N2   | C12  | C11  | 130.6(2) |
| C12  | N2   | C13  | 129.4(2)   | N2   | C12  | C16  | 106.5(2) |
| C14  | N2   | C12  | 108.46(19) | C16  | C12  | C11  | 122.9(2) |
| C14  | N2   | C13  | 121.9(2)   | N2   | C14  | C15  | 111.6(2) |
| C2   | C1   | N1   | 121.5(2)   | C14  | C15  | C16  | 104.1(2) |
| C1   | C2   | C3   | 119.0(2)   | C14  | C15  | C17  | 123.1(2) |
| C4   | C3   | C2   | 119.5(2)   | C16  | C15  | C17  | 132.7(2) |
| C3   | C4   | C5   | 121.8(2)   | N1   | C16  | C15  | 130.7(2) |
| N1   | C5   | C4   | 117.3(2)   | C12  | C16  | N1   | 119.8(2) |
| N1   | C5   | C6   | 119.6(2)   | C12  | C16  | C15  | 109.3(2) |
| C4   | C5   | C6   | 123.1(2)   | C18  | C17  | C15  | 120.7(2) |
| C7   | C6   | C5   | 120.1(2)   | C22  | C17  | C15  | 120.3(2) |
| C7   | C6   | C11  | 118.5(2)   | C22  | C17  | C18  | 118.9(2) |
| C11  | C6   | C5   | 121.4(2)   | C19  | C18  | C17  | 120.3(3) |
| C8   | C7   | C6   | 121.1(2)   | C20  | C19  | C18  | 120.4(3) |
| C7   | C8   | C9   | 120.2(2)   | C19  | C20  | C21  | 119.7(3) |
| C10  | C9   | C8   | 120.5(2)   | C20  | C21  | C22  | 120.7(3) |
| C9   | C10  | C11  | 120.7(2)   | C21  | C22  | C17  | 120.0(3) |
| C6   | C11  | C12  | 115.6(2)   |      |      |      |          |

**Table S6 Torsion Angles for 8.**

| A  | B   | C   | D   | Angle/°   | A   | B   | C   | D   | Angle/°   |
|----|-----|-----|-----|-----------|-----|-----|-----|-----|-----------|
| N1 | C1  | C2  | C3  | 0.5(4)    | C9  | C10 | C11 | C12 | 178.9(2)  |
| N1 | C5  | C6  | C7  | 179.0(2)  | C10 | C11 | C12 | N2  | 5.6(4)    |
| N1 | C5  | C6  | C11 | -1.6(3)   | C10 | C11 | C12 | C16 | -173.3(2) |
| N2 | C12 | C16 | N1  | 172.2(2)  | C11 | C6  | C7  | C8  | 2.2(4)    |
| N2 | C12 | C16 | C15 | -2.2(3)   | C11 | C12 | C16 | N1  | -8.7(3)   |
| N2 | C14 | C15 | C16 | -1.8(3)   | C11 | C12 | C16 | C15 | 176.9(2)  |
| N2 | C14 | C15 | C17 | 174.6(2)  | C12 | N2  | C14 | C15 | 0.5(3)    |
| C1 | N1  | C5  | C4  | -1.0(3)   | C13 | N2  | C12 | C11 | -3.0(4)   |
| C1 | N1  | C5  | C6  | 177.7(2)  | C13 | N2  | C12 | C16 | 176.0(2)  |
| C1 | N1  | C16 | C12 | -172.8(2) | C13 | N2  | C14 | C15 | -174.8(2) |
| C1 | N1  | C16 | C15 | 0.3(4)    | C14 | N2  | C12 | C11 | -177.9(2) |
| C1 | C2  | C3  | C4  | -0.9(4)   | C14 | N2  | C12 | C16 | 1.1(3)    |
| C2 | C3  | C4  | C5  | 0.4(4)    | C14 | C15 | C16 | N1  | -171.1(2) |
| C3 | C4  | C5  | N1  | 0.6(3)    | C14 | C15 | C16 | C12 | 2.5(3)    |
| C3 | C4  | C5  | C6  | -178.1(2) | C14 | C15 | C17 | C18 | -119.6(3) |
| C4 | C5  | C6  | C7  | -2.3(4)   | C14 | C15 | C17 | C22 | 57.2(4)   |
| C4 | C5  | C6  | C11 | 177.0(2)  | C15 | C17 | C18 | C19 | 178.6(3)  |
| C5 | N1  | C1  | C2  | 0.5(3)    | C15 | C17 | C22 | C21 | -179.0(3) |
| C5 | N1  | C16 | C12 | 6.9(3)    | C16 | N1  | C1  | C2  | -179.8(2) |
| C5 | N1  | C16 | C15 | 180.0(2)  | C16 | N1  | C5  | C4  | 179.4(2)  |
| C5 | C6  | C7  | C8  | -178.4(2) | C16 | N1  | C5  | C6  | -1.9(3)   |
| C5 | C6  | C11 | C10 | 178.6(2)  | C16 | C15 | C17 | C18 | 55.6(4)   |
| C5 | C6  | C11 | C12 | 0.2(3)    | C16 | C15 | C17 | C22 | -127.6(3) |
| C6 | C7  | C8  | C9  | -0.8(4)   | C17 | C15 | C16 | N1  | 13.0(4)   |
| C6 | C11 | C12 | N2  | -176.1(2) | C17 | C15 | C16 | C12 | -173.4(3) |
| C6 | C11 | C12 | C16 | 5.0(3)    | C17 | C18 | C19 | C20 | 0.4(4)    |
| C7 | C6  | C11 | C10 | -2.1(3)   | C18 | C17 | C22 | C21 | -2.2(4)   |
| C7 | C6  | C11 | C12 | 179.5(2)  | C18 | C19 | C20 | C21 | -2.2(5)   |
| C7 | C8  | C9  | C10 | -0.7(4)   | C19 | C20 | C21 | C22 | 1.7(5)    |
| C8 | C9  | C10 | C11 | 0.8(4)    | C20 | C21 | C22 | C17 | 0.5(5)    |
| C9 | C10 | C11 | C6  | 0.6(4)    | C22 | C17 | C18 | C19 | 1.7(4)    |

**Table S7 Hydrogen Atom Coordinates ( $\text{\AA} \times 10^4$ ) and Isotropic Displacement Parameters ( $\text{\AA}^2 \times 10^3$ ) for 8.**

| Atom | x    | y    | z    | U(eq) |
|------|------|------|------|-------|
| H1   | 6022 | 2662 | 3590 | 22    |
| H2   | 6129 | 4149 | 2606 | 24    |
| H3   | 6939 | 4124 | 2346 | 25    |
| H4   | 7621 | 2672 | 3092 | 23    |

|      |      |       |      |     |
|------|------|-------|------|-----|
| H7   | 8220 | 1397  | 3765 | 24  |
| H8   | 8895 | -71   | 4516 | 28  |
| H9   | 8774 | -1492 | 5527 | 27  |
| H10  | 7982 | -1413 | 5798 | 22  |
| H13A | 7228 | -2489 | 6100 | 30  |
| H13B | 6946 | -1492 | 6590 | 30  |
| H13C | 7491 | -918  | 6511 | 30  |
| H14  | 6163 | -354  | 5746 | 21  |
| H18  | 5556 | -126  | 3470 | 34  |
| H19  | 4679 | 475   | 2952 | 45  |
| H20  | 4242 | 2120  | 3576 | 47  |
| H21  | 4667 | 3039  | 4757 | 46  |
| H22  | 5540 | 2430  | 5294 | 33  |
| H1A  | 4179 | 6488  | 3274 | 68  |
| H23A | 4891 | 6048  | 2973 | 105 |
| H23B | 5111 | 5197  | 3749 | 105 |
| H23C | 5017 | 7074  | 3708 | 105 |

1-Benzyl-3-phenyl-1*H*-pyrido[2,1-*a*]pyrrolo[3,2-*c*]isoquinolin-4-ium bromide (**9a**)

Single crystals of **9a** were growth from chloroform/diethyl ether. CCDC for **9a** is 1407107.

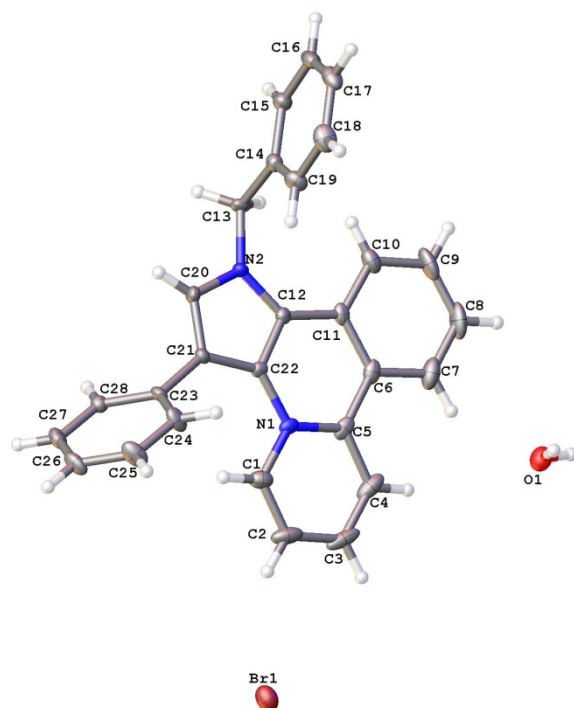

Molecular structure of compound **9a**, displacement parameters are drawn at 50% probability level.

**Table S8 Crystal data and structure refinement for 9a.**

|                   |                                                                   |
|-------------------|-------------------------------------------------------------------|
| Empirical formula | C <sub>28</sub> H <sub>22</sub> BrN <sub>2</sub> O <sub>0.5</sub> |
| Formula weight    | 474.89                                                            |

|                                                |                                                                  |
|------------------------------------------------|------------------------------------------------------------------|
| Temperature/K                                  | 293(2)                                                           |
| Crystal system                                 | triclinic                                                        |
| Space group                                    | P-1                                                              |
| a/Å                                            | 9.9409(5)                                                        |
| b/Å                                            | 10.7823(5)                                                       |
| c/Å                                            | 11.4682(6)                                                       |
| $\alpha/^\circ$                                | 67.893(5)                                                        |
| $\beta/^\circ$                                 | 76.899(5)                                                        |
| $\gamma/^\circ$                                | 87.268(4)                                                        |
| Volume/Å <sup>3</sup>                          | 1108.25(10)                                                      |
| Z                                              | 2                                                                |
| $\rho_{\text{calc}}/\text{g}/\text{cm}^3$      | 1.423                                                            |
| $\mu/\text{mm}^{-1}$                           | 1.875                                                            |
| F(000)                                         | 487.0                                                            |
| Crystal size/mm <sup>3</sup>                   | 0.23 × 0.17 × 0.10                                               |
| Radiation                                      | MoK $\alpha$ ( $\lambda = 0.71073$ )                             |
| 2 $\Theta$ range for data collection/ $^\circ$ | 5.636 to 53.988                                                  |
| Index ranges                                   | -12 ≤ h ≤ 12, -13 ≤ k ≤ 13, -14 ≤ l ≤ 14                         |
| Reflections collected                          | 9310                                                             |
| Independent reflections                        | 4771 [ $R_{\text{int}} = 0.0223$ , $R_{\text{sigma}} = 0.0427$ ] |
| Data/restraints/parameters                     | 4771/2/292                                                       |
| Goodness-of-fit on F <sup>2</sup>              | 1.091                                                            |
| Final R indexes [ $I \geq 2\sigma(I)$ ]        | $R_1 = 0.0423$ , $wR_2 = 0.1037$                                 |
| Final R indexes [all data]                     | $R_1 = 0.0545$ , $wR_2 = 0.1109$                                 |
| Largest diff. peak/hole / e Å <sup>-3</sup>    | 0.45/-0.73                                                       |

**Table S9 Fractional Atomic Coordinates ( $\times 10^4$ ) and Equivalent Isotropic Displacement Parameters ( $\text{\AA}^2 \times 10^3$ ) for 9a.  $U_{\text{eq}}$  is defined as 1/3 of the trace of the orthogonalised  $U_{\text{IJ}}$  tensor.**

| Atom | x       | y       | z       | U(eq)   |
|------|---------|---------|---------|---------|
| N1   | 3056(2) | 4597(2) | 4979(2) | 15.2(5) |
| N2   | 2418(2) | 7745(2) | 5273(2) | 14.7(5) |
| C9   | 3662(3) | 5246(4) | 9002(3) | 32.8(8) |
| C23  | 1678(3) | 6841(3) | 2687(3) | 14.1(5) |
| C22  | 2618(3) | 5893(3) | 4846(3) | 12.9(5) |
| C21  | 2088(3) | 6878(3) | 3843(2) | 13.3(5) |
| C12  | 2779(3) | 6433(3) | 5742(3) | 13.7(5) |
| C20  | 2012(3) | 7993(3) | 4145(3) | 16.1(6) |
| C26  | 914(3)  | 6841(3) | 497(3)  | 24.7(7) |
| C14  | 1149(3) | 8825(3) | 6768(3) | 16.8(6) |
| C3   | 3981(3) | 2100(3) | 5143(4) | 32.4(8) |
| C1   | 3047(3) | 4143(3) | 4007(3) | 21.7(6) |
| C28  | 2406(3) | 7649(3) | 1455(3) | 15.8(5) |



|     |           |          |           |           |
|-----|-----------|----------|-----------|-----------|
| C5  | 3549(3)   | 3820(3)  | 6045(3)   | 19.4(6)   |
| C10 | 3268(3)   | 6094(3)  | 7903(3)   | 23.4(6)   |
| C8  | 4036(3)   | 3951(4)  | 9130(3)   | 36.2(9)   |
| C17 | -1218(3)  | 9042(3)  | 8525(3)   | 26.3(7)   |
| C7  | 3997(3)   | 3493(3)  | 8175(3)   | 30.3(8)   |
| C24 | 560(3)    | 6036(3)  | 2804(3)   | 23.8(7)   |
| C6  | 3593(3)   | 4329(3)  | 7036(3)   | 19.6(6)   |
| C15 | 1148(3)   | 9691(3)  | 7408(3)   | 19.7(6)   |
| C27 | 2017(3)   | 7650(3)  | 366(3)    | 21.1(6)   |
| C2  | 3496(3)   | 2914(3)  | 4071(4)   | 28.8(7)   |
| C13 | 2450(3)   | 8796(3)  | 5784(3)   | 17.5(6)   |
| C11 | 3217(3)   | 5657(3)  | 6901(3)   | 16.7(6)   |
| C16 | -31(3)    | 9805(3)  | 8278(3)   | 24.0(7)   |
| C25 | 187(3)    | 6035(4)  | 1707(3)   | 28.2(7)   |
| C19 | -46(3)    | 8059(3)  | 7020(3)   | 22.8(6)   |
| C4  | 4019(3)   | 2548(3)  | 6093(4)   | 29.3(8)   |
| C18 | -1222(3)  | 8172(3)  | 7905(3)   | 28.2(7)   |
| Br1 | 4831.7(3) | 751.0(3) | 2406.6(3) | 28.44(12) |
| O1  | 4355(5)   | 545(5)   | 9646(4)   | 28.3(10)  |

**Table S10 Anisotropic Displacement Parameters ( $\text{\AA}^2 \times 10^3$ ) for 9a. The Anisotropic displacement factor exponent takes the form:  $-2\pi^2[h^2a^{*2}U_{11}+2hka^*b^*U_{12}+\dots]$ .**

| Atom | $U_{11}$ | $U_{22}$ | $U_{33}$ | $U_{23}$  | $U_{13}$  | $U_{12}$ |
|------|----------|----------|----------|-----------|-----------|----------|
| N1   | 11.4(11) | 12.7(11) | 21.8(12) | -7.5(10)  | -2.0(9)   | -1.4(9)  |
| N2   | 20.3(12) | 12.9(11) | 12.4(11) | -6.6(9)   | -2.9(9)   | -0.8(9)  |
| C9   | 23.4(16) | 59(2)    | 13.7(15) | -8.4(15)  | -7.5(12)  | -3.4(15) |
| C23  | 15.2(13) | 18.7(14) | 11.2(13) | -8.5(11)  | -3.9(10)  | 2.7(10)  |
| C22  | 10.0(12) | 12.6(13) | 15.8(13) | -5.6(11)  | -1.4(10)  | -2(1)    |
| C21  | 14.5(12) | 15.1(13) | 10.1(12) | -5.3(11)  | -1.3(10)  | -0.5(10) |
| C12  | 12.9(12) | 13.9(13) | 12.9(13) | -3.8(11)  | -1.7(10)  | -1.4(10) |
| C20  | 21.7(14) | 13.1(13) | 12.5(13) | -3.1(11)  | -5.2(11)  | 1.7(11)  |
| C26  | 20.8(15) | 42.0(19) | 17.4(15) | -16.4(14) | -7.9(12)  | 4.5(13)  |
| C14  | 17.1(13) | 19.0(14) | 14.2(13) | -5.8(11)  | -4.7(11)  | 2.3(11)  |
| C3   | 12.5(14) | 16.0(15) | 69(3)    | -19.4(17) | -2.7(15)  | 0.5(12)  |
| C1   | 16.6(14) | 23.5(15) | 28.6(17) | -15.2(13) | -2.3(12)  | -1.2(11) |
| C28  | 14.7(13) | 17.1(13) | 15.5(13) | -6.3(11)  | -2.8(10)  | 1.1(10)  |
| C5   | 9.3(12)  | 15.4(14) | 28.9(16) | -2.5(12)  | -4.7(11)  | -2.2(10) |
| C10  | 19.0(14) | 34.5(17) | 16.0(14) | -8.2(13)  | -3.6(11)  | -2.8(12) |
| C8   | 24.6(17) | 51(2)    | 19.8(16) | 5.9(15)   | -12.0(13) | -3.2(15) |
| C17  | 21.3(15) | 38.3(18) | 18.1(15) | -10.4(14) | -4.6(12)  | 10.7(13) |
| C7   | 20.0(15) | 29.4(17) | 29.2(18) | 5.3(14)   | -9.4(13)  | -1.4(13) |

|     |           |          |           |            |           |           |
|-----|-----------|----------|-----------|------------|-----------|-----------|
| C24 | 17.9(14)  | 35.9(18) | 15.5(14)  | -9.4(13)   | 1.9(11)   | -9.6(13)  |
| C6  | 11.8(13)  | 20.4(14) | 20.4(15)  | 0.2(12)    | -4.5(11)  | -3.7(11)  |
| C15 | 23.8(15)  | 19.2(14) | 17.9(14)  | -8.4(12)   | -5.7(11)  | 1.0(11)   |
| C27 | 20.3(14)  | 28.9(16) | 12.4(14)  | -7.4(12)   | -1.4(11)  | 3.1(12)   |
| C2  | 16.5(14)  | 24.5(16) | 53(2)     | -25.6(16)  | -2.0(14)  | -1.4(12)  |
| C13 | 21.5(14)  | 15.1(13) | 18.8(14)  | -10.9(12)  | -1.7(11)  | -2.3(11)  |
| C11 | 10.5(12)  | 22.2(14) | 13.6(13)  | -2.0(11)   | -2.1(10)  | -4.2(10)  |
| C16 | 31.0(17)  | 26.7(16) | 16.4(15)  | -11.0(13)  | -6.1(12)  | 10.5(13)  |
| C25 | 18.6(15)  | 46(2)    | 25.3(17)  | -18.9(15)  | -3.8(12)  | -8.4(14)  |
| C19 | 21.5(15)  | 29.5(16) | 22.9(15)  | -14.4(13)  | -7.2(12)  | -0.1(12)  |
| C4  | 14.9(14)  | 15.6(15) | 52(2)     | -5.0(15)   | -9.4(14)  | 1.0(11)   |
| C18 | 15.8(14)  | 39.7(19) | 27.1(17)  | -9.0(15)   | -6.5(12)  | -1.7(13)  |
| Br1 | 24.71(18) | 38.0(2)  | 23.11(18) | -10.77(14) | -7.26(12) | -0.51(13) |
| O1  | 29(2)     | 26(2)    | 29(2)     | -7(2)      | -9.6(19)  | 4(2)      |

**Table S11 Bond Lengths for 9a.**

| Atom | Atom | Length/Å | Atom | Atom            | Length/Å |
|------|------|----------|------|-----------------|----------|
| N1   | C22  | 1.406(3) | C14  | C13             | 1.518(4) |
| N1   | C1   | 1.378(4) | C14  | C19             | 1.391(4) |
| N1   | C5   | 1.378(4) | C3   | C2              | 1.390(5) |
| N2   | C12  | 1.373(3) | C3   | C4              | 1.356(5) |
| N2   | C20  | 1.368(3) | C1   | C2              | 1.359(4) |
| N2   | C13  | 1.463(3) | C28  | C27             | 1.388(4) |
| C9   | C10  | 1.378(4) | C5   | C6              | 1.445(4) |
| C9   | C8   | 1.390(6) | C5   | C4              | 1.413(4) |
| C23  | C21  | 1.488(4) | C10  | C11             | 1.408(4) |
| C23  | C28  | 1.396(4) | C8   | C7              | 1.369(5) |
| C23  | C24  | 1.394(4) | C17  | C16             | 1.384(5) |
| C22  | C21  | 1.425(4) | C17  | C18             | 1.375(5) |
| C22  | C12  | 1.398(4) | C7   | C6              | 1.413(4) |
| C21  | C20  | 1.365(4) | C24  | C25             | 1.390(4) |
| C12  | C11  | 1.430(4) | C6   | C11             | 1.422(4) |
| C26  | C27  | 1.380(4) | C15  | C16             | 1.390(4) |
| C26  | C25  | 1.378(4) | C19  | C18             | 1.398(4) |
| C14  | C15  | 1.389(4) | O1   | O1 <sup>1</sup> | 1.816(9) |

<sup>1</sup>1-X,-Y,2-Z

**Table S12 Bond Angles for 9a.**

Atom Atom Atom Angle/° Atom Atom Atom Angle/°

|     |     |     |          |     |     |     |          |
|-----|-----|-----|----------|-----|-----|-----|----------|
| C1  | N1  | C22 | 119.3(2) | C2  | C1  | N1  | 121.6(3) |
| C1  | N1  | C5  | 120.7(2) | C27 | C28 | C23 | 120.4(3) |
| C5  | N1  | C22 | 119.9(2) | N1  | C5  | C6  | 120.0(2) |
| C12 | N2  | C13 | 130.0(2) | N1  | C5  | C4  | 116.9(3) |
| C20 | N2  | C12 | 108.6(2) | C4  | C5  | C6  | 123.1(3) |
| C20 | N2  | C13 | 121.4(2) | C9  | C10 | C11 | 120.6(3) |
| C10 | C9  | C8  | 120.5(3) | C7  | C8  | C9  | 120.4(3) |
| C28 | C23 | C21 | 119.6(2) | C18 | C17 | C16 | 119.5(3) |
| C24 | C23 | C21 | 121.5(2) | C8  | C7  | C6  | 120.8(3) |
| C24 | C23 | C28 | 118.9(2) | C25 | C24 | C23 | 120.3(3) |
| N1  | C22 | C21 | 130.4(2) | C7  | C6  | C5  | 119.8(3) |
| C12 | C22 | N1  | 120.1(2) | C7  | C6  | C11 | 118.8(3) |
| C12 | C22 | C21 | 109.3(2) | C11 | C6  | C5  | 121.3(3) |
| C22 | C21 | C23 | 132.4(2) | C14 | C15 | C16 | 120.7(3) |
| C20 | C21 | C23 | 123.3(2) | C26 | C27 | C28 | 120.0(3) |
| C20 | C21 | C22 | 104.3(2) | C1  | C2  | C3  | 119.0(3) |
| N2  | C12 | C22 | 106.3(2) | N2  | C13 | C14 | 114.2(2) |
| N2  | C12 | C11 | 131.3(3) | C10 | C11 | C12 | 125.4(3) |
| C22 | C12 | C11 | 122.4(2) | C10 | C11 | C6  | 118.8(3) |
| C21 | C20 | N2  | 111.3(2) | C6  | C11 | C12 | 115.8(3) |
| C25 | C26 | C27 | 120.3(3) | C17 | C16 | C15 | 120.2(3) |
| C15 | C14 | C13 | 118.0(2) | C26 | C25 | C24 | 120.1(3) |
| C15 | C14 | C19 | 118.9(3) | C14 | C19 | C18 | 119.9(3) |
| C19 | C14 | C13 | 123.0(3) | C3  | C4  | C5  | 122.0(3) |
| C4  | C3  | C2  | 119.8(3) | C17 | C18 | C19 | 120.7(3) |

**Table S13 Torsion Angles for 9a.**

| A  | B   | C   | D   | Angle/°   | A   | B   | C   | D   | Angle/°   |
|----|-----|-----|-----|-----------|-----|-----|-----|-----|-----------|
| N1 | C22 | C21 | C23 | 7.6(5)    | C1  | N1  | C5  | C6  | 178.0(2)  |
| N1 | C22 | C21 | C20 | -172.3(3) | C1  | N1  | C5  | C4  | -0.8(4)   |
| N1 | C22 | C12 | N2  | 172.9(2)  | C28 | C23 | C21 | C22 | -116.1(3) |
| N1 | C22 | C12 | C11 | -8.2(4)   | C28 | C23 | C21 | C20 | 63.7(4)   |
| N1 | C1  | C2  | C3  | -0.3(4)   | C28 | C23 | C24 | C25 | 0.5(4)    |
| N1 | C5  | C6  | C7  | 175.1(2)  | C5  | N1  | C22 | C21 | 179.4(3)  |
| N1 | C5  | C6  | C11 | -4.0(4)   | C5  | N1  | C22 | C12 | 4.9(4)    |
| N1 | C5  | C4  | C3  | -0.5(4)   | C5  | N1  | C1  | C2  | 1.2(4)    |
| N2 | C12 | C11 | C10 | 5.4(5)    | C5  | C6  | C11 | C12 | 1.0(4)    |
| N2 | C12 | C11 | C6  | -176.3(3) | C5  | C6  | C11 | C10 | 179.4(2)  |
| C9 | C10 | C11 | C12 | 177.7(3)  | C10 | C9  | C8  | C7  | -1.0(5)   |
| C9 | C10 | C11 | C6  | -0.6(4)   | C8  | C9  | C10 | C11 | 1.0(5)    |
| C9 | C8  | C7  | C6  | 0.8(5)    | C8  | C7  | C6  | C5  | -179.5(3) |

C23 C21 C20 N2 178.5(2) C8 C7 C6 C11 -0.4(4)  
 C23 C28 C27 C26 -0.6(4) C7 C6 C11 C12 -178.2(2)  
 C23 C24 C25 C26 -0.7(5) C7 C6 C11 C10 0.3(4)  
 C22 N1 C1 C2 178.2(3) C24 C23 C21 C22 65.4(4)  
 C22 N1 C5 C6 1.0(4) C24 C23 C21 C20 -114.8(3)  
 C22 N1 C5 C4 -177.7(2) C24 C23 C28 C27 0.1(4)  
 C22 C21 C20 N2 -1.7(3) C6 C5 C4 C3 -179.2(3)  
 C22 C12 C11 C10 -173.2(3) C15 C14 C13 N2 173.0(2)  
 C22 C12 C11 C6 5.1(4) C15 C14 C19 C18 0.1(4)  
 C21 C23 C28 C27 -178.5(3) C27 C26 C25 C24 0.2(5)  
 C21 C23 C24 C25 179.0(3) C2 C3 C4 C5 1.4(5)  
 C21 C22 C12 N2 -2.7(3) C13 N2 C12 C22 -177.0(3)  
 C21 C22 C12 C11 176.2(2) C13 N2 C12 C11 4.2(5)  
 C12 N2 C20 C21 0.1(3) C13 N2 C20 C21 178.9(2)  
 C12 N2 C13 C14 -87.0(3) C13 C14 C15 C16 177.2(3)  
 C12 C22 C21 C23 -177.5(3) C13 C14 C19 C18 -177.7(3)  
 C12 C22 C21 C20 2.7(3) C16 C17 C18 C19 -0.6(5)  
 C20 N2 C12 C22 1.6(3) C25 C26 C27 C28 0.4(5)  
 C20 N2 C12 C11 -177.2(3) C19 C14 C15 C16 -0.7(4)  
 C20 N2 C13 C14 94.5(3) C19 C14 C13 N2 -9.2(4)  
 C14 C15 C16 C17 0.6(4) C4 C3 C2 C1 -1.0(5)  
 C14 C19 C18 C17 0.6(5) C4 C5 C6 C7 -6.2(4)  
 C1 N1 C22 C21 2.4(4) C4 C5 C6 C11 174.7(3)  
 C1 N1 C22 C12 -172.1(2) C18 C17 C16 C15 0.0(4)

**Table S14 Hydrogen Atom Coordinates ( $\text{\AA} \times 10^4$ ) and Isotropic Displacement Parameters ( $\text{\AA}^2 \times 10^3$ ) for 9a.**

| Atom | <i>x</i> | <i>y</i> | <i>z</i> | U(eq) |
|------|----------|----------|----------|-------|
| H9   | 3678     | 5543     | 9662     | 39    |
| H20  | 1721     | 8815     | 3649     | 19    |
| H26  | 659      | 6840     | -235     | 30    |
| H3   | 4279     | 1250     | 5209     | 39    |
| H1   | 2726     | 4692     | 3288     | 26    |
| H28  | 3155     | 8189     | 1364     | 19    |
| H10  | 3034     | 6963     | 7823     | 28    |
| H8   | 4315     | 3391     | 9869     | 43    |
| H17  | -2008    | 9118     | 9106     | 32    |
| H7   | 4239     | 2620     | 8276     | 36    |
| H24  | 61       | 5497     | 3619     | 29    |
| H15  | 1945     | 10201    | 7254     | 24    |
| H27  | 2500     | 8197     | -452     | 25    |

|      |       |       |       |    |
|------|-------|-------|-------|----|
| H2   | 3479  | 2622  | 3407  | 35 |
| H13A | 2590  | 9658  | 5070  | 21 |
| H13B | 3234  | 8672  | 6183  | 21 |
| H16  | -22   | 10395 | 8694  | 29 |
| H25  | -554  | 5490  | 1789  | 34 |
| H19  | -62   | 7473  | 6600  | 27 |
| H4   | 4364  | 2002  | 6797  | 35 |
| H18  | -2017 | 7652  | 8077  | 34 |
| H1A  | 3528  | 588   | 9703  | 43 |
| H1B  | 4794  | 244   | 10245 | 43 |

**Table S15 Atomic Occupancy for 9a.**

|    | <i>Atom Occupancy</i> | <i>Atom Occupancy</i> | <i>Atom Occupancy</i> |
|----|-----------------------|-----------------------|-----------------------|
| O1 | 0.5                   | H1A 0.5               | H1B 0.5               |

2-Phenylpyrido[2,1-a]pyrrolo[3,2-c]isoquinoline (**11**)

Single crystals of **11** were growth from chloroform/hexane. CCDC for **11** is 1407277

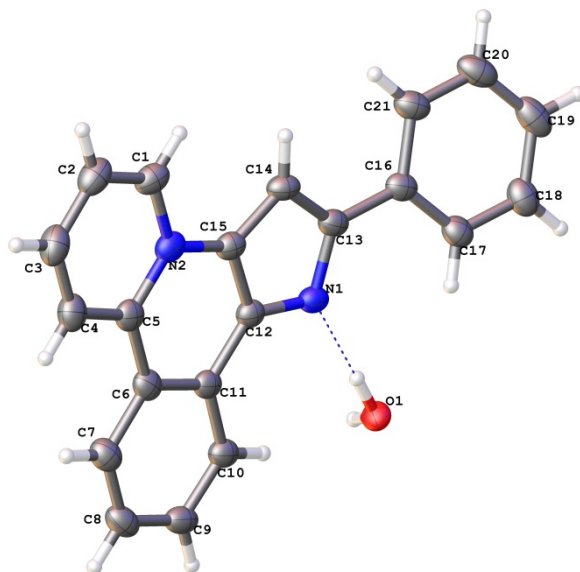

Molecular structure of compound **11**, displacement parameters are drawn at 50% probability level.

**Table S16 Crystal data and structure refinement for 11**

|                   |                                                                 |
|-------------------|-----------------------------------------------------------------|
| Empirical formula | C <sub>21</sub> H <sub>15</sub> N <sub>2</sub> O <sub>0.5</sub> |
| Formula weight    | 303.35                                                          |
| Temperature/K     | 100(2)                                                          |
| Crystal system    | monoclinic                                                      |
| Space group       | P2 <sub>1</sub> /n                                              |
| a/Å               | 17.5157(6)                                                      |

|                                             |                                                   |
|---------------------------------------------|---------------------------------------------------|
| b/Å                                         | 8.5175(2)                                         |
| c/Å                                         | 19.8322(5)                                        |
| $\alpha$ /°                                 | 90.00                                             |
| $\beta$ /°                                  | 95.754(3)                                         |
| $\gamma$ /°                                 | 90.00                                             |
| Volume/Å <sup>3</sup>                       | 2943.85(15)                                       |
| Z                                           | 8                                                 |
| $\rho_{\text{calc}}$ /mg/mm <sup>3</sup>    | 1.369                                             |
| m/mm <sup>-1</sup>                          | 0.651                                             |
| F(000)                                      | 1272.0                                            |
| Crystal size/mm <sup>3</sup>                | 0.24 × 0.16 × 0.08                                |
| 2 $\Theta$ range for data collection        | 6.42 to 144.98°                                   |
| Index ranges                                | -21 ≤ h ≤ 21, -10 ≤ k ≤ 10, -23 ≤ l ≤ 24          |
| Reflections collected                       | 45149                                             |
| Independent reflections                     | 5846[R(int) = 0.0632]                             |
| Data/restraints/parameters                  | 5846/0/440                                        |
| Goodness-of-fit on F <sup>2</sup>           | 1.037                                             |
| Final R indexes [I ≥ 2 $\sigma$ (I)]        | R <sub>1</sub> = 0.0489, wR <sub>2</sub> = 0.1266 |
| Final R indexes [all data]                  | R <sub>1</sub> = 0.0769, wR <sub>2</sub> = 0.1499 |
| Largest diff. peak/hole / e Å <sup>-3</sup> | 0.23/-0.19                                        |

**Table S17 Fractional Atomic Coordinates ( $\times 10^4$ ) and Equivalent Isotropic Displacement Parameters ( $\text{\AA}^2 \times 10^3$ ) for 11.  $U_{\text{eq}}$  is defined as 1/3 of of the trace of the orthogonalsed**

| Atom | $U_{ij}$ tensor. |             |              | U(eq)    |
|------|------------------|-------------|--------------|----------|
|      | x                | y           | z            |          |
| C11  | 5551.6 (10)      | 6237 (2)    | 754.0 (9)    | 33.0 (4) |
| N2   | 5030.7 (9)       | 7791.6 (19) | -482.5 (7)   | 35.5 (4) |
| N1   | 4428.4 (9)       | 7605.0 (18) | 1191.7 (7)   | 34.0 (3) |
| C6   | 5913.8 (10)      | 5984 (2)    | 155.0 (9)    | 35.9 (4) |
| C15  | 4658.2 (11)      | 8029 (2)    | 95.7 (9)     | 33.3 (4) |
| C7   | 6543.4 (11)      | 4948 (2)    | 183.2 (10)   | 42.2 (5) |
| C1   | 4781.3 (12)      | 8604 (2)    | -1065.1 (9)  | 41.3 (5) |
| C5   | 5639.2 (11)      | 6754 (2)    | -473.6 (9)   | 36.5 (4) |
| C12  | 4901.3 (10)      | 7255 (2)    | 709.7 (9)    | 32.2 (4) |
| C8   | 6807.1 (11)      | 4206 (2)    | 775.4 (11)   | 44.5 (5) |
| C14  | 4005.8 (11)      | 8898 (2)    | 203.0 (9)    | 35.9 (4) |
| C10  | 5831.3 (11)      | 5462 (2)    | 1357.5 (10)  | 36.8 (4) |
| C4   | 5960.9 (12)      | 6518 (3)    | -1088.8 (10) | 44.7 (5) |
| C16  | 3245.2 (10)      | 9186 (2)    | 1234.1 (9)   | 34.8 (4) |
| C9   | 6450.4 (11)      | 4472 (2)    | 1365.5 (10)  | 41.6 (5) |
| C21  | 2788.4 (12)      | 10430 (2)   | 962.5 (10)   | 42.1 (5) |
| C13  | 3883.2 (10)      | 8598 (2)    | 878.2 (9)    | 34.0 (4) |
| C2   | 5114.3 (13)      | 8396 (3)    | -1648.4 (10) | 47.5 (5) |

|      |              |             |              |           |
|------|--------------|-------------|--------------|-----------|
| C19  | 1997.9 (12)  | 10280 (3)   | 1885.8 (11)  | 51.6 (6)  |
| C20  | 2172.7 (12)  | 10969 (3)   | 1286.7 (11)  | 49.7 (5)  |
| C3   | 5710.3 (12)  | 7314 (3)    | -1663.5 (10) | 49.8 (6)  |
| C17  | 3071.3 (11)  | 8529 (3)    | 1839.0 (9)   | 39.7 (4)  |
| C18  | 2452.1 (11)  | 9061 (3)    | 2162.3 (10)  | 46.5 (5)  |
| N2A  | 6.3 (9)      | 7806.7 (19) | 427.0 (7)    | 36.9 (4)  |
| N1A  | 617.7 (9)    | 7631.7 (18) | -1244.5 (7)  | 35.1 (4)  |
| C6A  | -872.2 (11)  | 6004 (2)    | -221.8 (9)   | 35.4 (4)  |
| C12A | 143.1 (10)   | 7282 (2)    | -766.4 (9)   | 33.8 (4)  |
| C5A  | -611.2 (11)  | 6782 (2)    | 407.6 (9)    | 38.2 (4)  |
| C11A | -507.7 (10)  | 6271 (2)    | -817.6 (9)   | 33.5 (4)  |
| C10A | -786.8 (11)  | 5510 (2)    | -1426.6 (9)  | 36.1 (4)  |
| C15A | 388.1 (11)   | 8040 (2)    | -149.9 (9)   | 36.4 (4)  |
| C9A  | -1400.4 (11) | 4508 (2)    | -1441.8 (10) | 40.8 (4)  |
| C8A  | -1754.4 (12) | 4215 (2)    | -853.2 (11)  | 44.1 (5)  |
| C7A  | -1496.3 (11) | 4944 (2)    | -257.1 (10)  | 42.4 (5)  |
| C13A | 1165.2 (11)  | 8615 (2)    | -923.0 (9)   | 36.3 (4)  |
| C4A  | -954.6 (12)  | 6572 (3)    | 1011.7 (10)  | 46.5 (5)  |
| C14A | 1042.1 (11)  | 8901 (2)    | -247.4 (9)   | 38.6 (4)  |
| C1A  | 247.7 (12)   | 8615 (2)    | 1009.4 (9)   | 43.2 (5)  |
| C16A | 1800.4 (11)  | 9204 (2)    | -1279.5 (10) | 39.0 (4)  |
| C2A  | -100.5 (13)  | 8431 (3)    | 1584.7 (10)  | 48.3 (5)  |
| C21A | 1960.1 (11)  | 8568 (3)    | -1891.8 (10) | 44.4 (5)  |
| C20A | 2580.6 (12)  | 9088 (3)    | -2214.6 (12) | 52.7 (6)  |
| C3A  | -711.5 (13)  | 7376 (3)    | 1591.9 (10)  | 51.2 (6)  |
| C17A | 2270.6 (12)  | 10426 (3)   | -1001.5 (11) | 47.9 (5)  |
| C19A | 3048.3 (13)  | 10269 (3)   | -1934.9 (13) | 59.1 (7)  |
| C18A | 2883.6 (13)  | 10946 (3)   | -1328.5 (13) | 58.1 (7)  |
| O1   | 4667.9 (11)  | 6358 (2)    | 2516.1 (8)   | 33.9 (5)  |
| O1A  | 344 (3)      | 6359 (6)    | -2533 (2)    | 56.0 (13) |

**Table S18 Anisotropic Displacement Parameters ( $\text{\AA}^2 \times 10^3$ ) for 11. The Anisotropic displacement factor exponent takes the form:  $-2\pi^2[h^2a^{*2}U_{11}+\dots+2hka \times b \times U_{12}]$**

| Atom | $U_{11}$  | $U_{22}$  | $U_{33}$  | $U_{23}$ | $U_{13}$ | $U_{12}$  |
|------|-----------|-----------|-----------|----------|----------|-----------|
| C11  | 29.3 (8)  | 28.1 (10) | 40.2 (9)  | -0.5 (7) | -3.6 (7) | -7.5 (7)  |
| N2   | 38.6 (8)  | 32.6 (9)  | 34.1 (7)  | -1.2 (6) | -2.9 (6) | -10.2 (7) |
| N1   | 33.7 (8)  | 28.7 (9)  | 38.1 (7)  | 2.4 (6)  | -4.3 (6) | -2.7 (6)  |
| C6   | 30.4 (9)  | 33.0 (11) | 43.1 (9)  | -5.4 (8) | -1.9 (7) | -7.5 (8)  |
| C15  | 36.2 (9)  | 28.2 (10) | 34.1 (8)  | -0.7 (7) | -3.7 (7) | -5.5 (7)  |
| C7   | 34.8 (10) | 42.2 (12) | 48.7 (10) | -7.4 (9) | -1.1 (8) | -1.4 (9)  |
| C1   | 48.6 (11) | 35.8 (11) | 37.2 (9)  | 2.3 (8)  | -7.1 (8) | -10.4 (9) |
| C5   | 33.2 (9)  | 33.4 (11) | 41.7 (9)  | -3.5 (8) | -1.4 (7) | -9.9 (8)  |
| C12  | 32.2 (9)  | 28.3 (10) | 35.2 (8)  | -0.2 (7) | -1.5 (7) | -5.3 (7)  |
| C8   | 32.9 (9)  | 38.6 (12) | 60.5 (12) | -7.8 (9) | -2.8 (9) | 2.3 (9)   |
| C14  | 39.2 (10) | 28.4 (10) | 37.8 (9)  | 2.1 (7)  | -8.1 (7) | -1.1 (8)  |

|      |          |          |          |           |           |           |
|------|----------|----------|----------|-----------|-----------|-----------|
| C10  | 33.1(9)  | 31(1)    | 44.7(9)  | 1.7(8)    | -3.9(7)   | -5.2(8)   |
| C4   | 37.5(10) | 51.2(13) | 45.4(10) | -5.3(9)   | 4.6(8)    | -12.0(9)  |
| C16  | 32.0(9)  | 29.4(10) | 40.8(9)  | -4.0(7)   | -7.3(7)   | -2.9(7)   |
| C9   | 35.3(10) | 31.5(11) | 54.9(11) | 4.8(9)    | -10.2(8)  | -4.1(8)   |
| C21  | 40.3(10) | 35.1(11) | 48.3(10) | -5.6(9)   | -8.3(8)   | 2.8(9)    |
| C13  | 31.9(9)  | 26.9(10) | 41.6(9)  | -1.4(7)   | -3.9(7)   | -2.5(7)   |
| C2   | 54.3(12) | 51.9(14) | 34.8(9)  | 2.7(9)    | -3.5(8)   | -19.2(11) |
| C19  | 33.2(10) | 59.1(15) | 60.6(13) | -25.7(11) | -4.2(9)   | 2.1(10)   |
| C20  | 40.9(11) | 44.6(14) | 60.0(12) | -13(1)    | -12.8(9)  | 8.3(10)   |
| C3   | 46.2(11) | 63.7(15) | 39.7(10) | -1.5(10)  | 5.5(9)    | -16.7(11) |
| C17  | 31.7(9)  | 42.4(12) | 43.7(9)  | -3.4(9)   | -2.8(8)   | -0.3(8)   |
| C18  | 35.1(10) | 55.8(15) | 48.1(10) | -11.2(10) | 0.6(8)    | -4.0(9)   |
| N2A  | 41.3(8)  | 28.7(9)  | 38.1(8)  | -2.3(6)   | -8.3(6)   | 8.5(7)    |
| N1A  | 35.3(8)  | 26.8(9)  | 41.6(8)  | -1.5(6)   | -4.2(6)   | 1.2(6)    |
| C6A  | 33.3(9)  | 29.1(10) | 41.8(9)  | 1.0(7)    | -6.2(7)   | 7.6(7)    |
| C12A | 35.4(9)  | 24.1(10) | 39.5(9)  | -2.0(7)   | -7.6(7)   | 5.0(7)    |
| C5A  | 35.7(9)  | 35.9(11) | 41.7(9)  | 2.7(8)    | -2.3(8)   | 13.5(8)   |
| C11A | 32.6(9)  | 25(1)    | 41.2(9)  | 2.1(7)    | -4.2(7)   | 7.1(7)    |
| C10A | 34.9(9)  | 30.2(10) | 41.6(9)  | -1.2(8)   | -4.4(7)   | 3.2(8)    |
| C15A | 40.5(10) | 28.5(10) | 38.0(9)  | 1.6(7)    | -6.4(8)   | 6.6(8)    |
| C9A  | 37.8(10) | 32.7(11) | 49.1(10) | -2.2(8)   | -9.1(8)   | 3.4(8)    |
| C8A  | 35(1)    | 36.6(12) | 58.3(12) | 3.2(9)    | -8.0(9)   | -1.2(8)   |
| C7A  | 36.1(10) | 41.3(12) | 48.5(10) | 7.6(9)    | -1.4(8)   | 5.3(9)    |
| C13A | 37.4(10) | 26(1)    | 42.5(9)  | -0.8(8)   | -11.1(8)  | 3.5(8)    |
| C4A  | 40.9(11) | 48.6(13) | 49.4(11) | -2.9(9)   | 0.9(9)    | 11.1(9)   |
| C14A | 41.7(10) | 26.3(10) | 44.2(10) | -0.1(8)   | -12.8(8)  | 2.0(8)    |
| C1A  | 52.2(12) | 35.8(11) | 38.8(9)  | -1.7(8)   | -8.8(8)   | 11.2(9)   |
| C16A | 34.0(9)  | 30.3(11) | 49.7(10) | 6.9(8)    | -11.2(8)  | 2.1(8)    |
| C2A  | 57.1(13) | 46.0(13) | 39.3(10) | -5.8(9)   | -8.0(9)   | 17.9(11)  |
| C21A | 35.4(10) | 42.4(12) | 53.7(11) | 2.7(10)   | -4.3(8)   | -0.4(9)   |
| C20A | 37.5(11) | 59.3(16) | 60.0(12) | 12.5(11)  | -0.8(9)   | 3.2(10)   |
| C3A  | 50.3(12) | 59.9(15) | 43.4(10) | 0.5(10)   | 4.5(9)    | 19.6(11)  |
| C17A | 44.5(11) | 36.5(12) | 58.0(12) | 7.8(9)    | -18.0(9)  | -5.1(9)   |
| C19A | 37.8(11) | 62.9(17) | 73.6(15) | 29.7(13)  | -8.8(10)  | -7.2(11)  |
| C18A | 46.5(12) | 45.5(15) | 76.8(15) | 20.5(12)  | -21.1(11) | -14.2(10) |
| O1   | 35.9(10) | 42.7(12) | 23.0(8)  | 4.2(8)    | 2.1(7)    | 0.4(9)    |
| O1A  | 53(3)    | 64(3)    | 49(2)    | -1(2)     | -7(2)     | -4(2)     |

**Table S19 Bond Lengths for 11.**

| Atom | Atom | Length/Å | Atom | Atom | Length/Å |
|------|------|----------|------|------|----------|
| C11  | C6   | 1.418(3) | N2A  | C5A  | 1.387(3) |
| C11  | C12  | 1.427(3) | N2A  | C15A | 1.396(2) |
| C11  | C10  | 1.411(3) | N2A  | C1A  | 1.374(2) |
| N2   | C15  | 1.390(2) | N1A  | C12A | 1.355(2) |
| N2   | C1   | 1.379(2) | N1A  | C13A | 1.380(2) |



|     |     |           |      |      |           |
|-----|-----|-----------|------|------|-----------|
| N2  | C5  | 1.383 (3) | C6A  | C5A  | 1.447 (3) |
| N1  | C12 | 1.359 (2) | C6A  | C11A | 1.417 (3) |
| N1  | C13 | 1.377 (2) | C6A  | C7A  | 1.414 (3) |
| C6  | C7  | 1.409 (3) | C12A | C11A | 1.424 (3) |
| C6  | C5  | 1.448 (3) | C12A | C15A | 1.411 (2) |
| C15 | C12 | 1.412 (2) | C5A  | C4A  | 1.405 (3) |
| C15 | C14 | 1.396 (3) | C11A | C10A | 1.414 (2) |
| C7  | C8  | 1.372 (3) | C10A | C9A  | 1.371 (3) |
| C1  | C2  | 1.358 (3) | C15A | C14A | 1.390 (3) |
| C5  | C4  | 1.409 (3) | C9A  | C8A  | 1.398 (3) |
| C8  | C9  | 1.399 (3) | C8A  | C7A  | 1.371 (3) |
| C14 | C13 | 1.401 (2) | C13A | C14A | 1.400 (3) |
| C10 | C9  | 1.372 (3) | C13A | C16A | 1.465 (3) |
| C4  | C3  | 1.361 (3) | C4A  | C3A  | 1.370 (3) |
| C16 | C21 | 1.402 (3) | C1A  | C2A  | 1.356 (3) |
| C16 | C13 | 1.468 (3) | C16A | C21A | 1.384 (3) |
| C16 | C17 | 1.385 (3) | C16A | C17A | 1.405 (3) |
| C21 | C20 | 1.388 (3) | C2A  | C3A  | 1.398 (3) |
| C2  | C3  | 1.395 (3) | C21A | C20A | 1.388 (3) |
| C19 | C20 | 1.386 (3) | C20A | C19A | 1.378 (3) |
| C19 | C18 | 1.387 (3) | C17A | C18A | 1.382 (3) |
| C17 | C18 | 1.390 (3) | C19A | C18A | 1.390 (4) |

**Table S20 Bond Angles for 11.**

| Atom | Atom | Atom | Angle/°     | Atom | Atom | Atom | Angle/°     |
|------|------|------|-------------|------|------|------|-------------|
| C6   | C11  | C12  | 117.53 (16) | C5A  | N2A  | C15A | 120.20 (16) |
| C10  | C11  | C6   | 119.51 (18) | C1A  | N2A  | C5A  | 120.79 (18) |
| C10  | C11  | C12  | 122.94 (17) | C1A  | N2A  | C15A | 119.01 (18) |
| C1   | N2   | C15  | 118.86 (17) | C12A | N1A  | C13A | 104.88 (15) |
| C1   | N2   | C5   | 120.66 (17) | C11A | C6A  | C5A  | 121.08 (18) |
| C5   | N2   | C15  | 120.48 (16) | C7A  | C6A  | C5A  | 120.75 (18) |
| C12  | N1   | C13  | 105.13 (15) | C7A  | C6A  | C11A | 118.17 (17) |
| C11  | C6   | C5   | 120.94 (18) | N1A  | C12A | C11A | 128.74 (16) |
| C7   | C6   | C11  | 118.43 (18) | N1A  | C12A | C15A | 110.55 (17) |
| C7   | C6   | C5   | 120.62 (18) | C15A | C12A | C11A | 120.68 (18) |
| N2   | C15  | C12  | 121.18 (17) | N2A  | C5A  | C6A  | 119.36 (17) |
| N2   | C15  | C14  | 131.47 (17) | N2A  | C5A  | C4A  | 117.11 (18) |
| C14  | C15  | C12  | 107.26 (16) | C4A  | C5A  | C6A  | 123.5 (2)   |
| C8   | C7   | C6   | 121.15 (19) | C6A  | C11A | C12A | 117.53 (17) |
| C2   | C1   | N2   | 121.4 (2)   | C10A | C11A | C6A  | 119.52 (18) |
| N2   | C5   | C6   | 119.32 (17) | C10A | C11A | C12A | 122.93 (17) |
| N2   | C5   | C4   | 117.05 (18) | C9A  | C10A | C11A | 120.49 (18) |
| C4   | C5   | C6   | 123.63 (19) | N2A  | C15A | C12A | 121.06 (18) |
| N1   | C12  | C11  | 128.95 (16) | C14A | C15A | N2A  | 131.18 (18) |
| N1   | C12  | C15  | 110.60 (17) | C14A | C15A | C12A | 107.71 (17) |

|     |     |     |             |      |      |      |             |
|-----|-----|-----|-------------|------|------|------|-------------|
| C15 | C12 | C11 | 120.42 (16) | C10A | C9A  | C8A  | 120.35 (18) |
| C7  | C8  | C9  | 120.07 (19) | C7A  | C8A  | C9A  | 120.24 (19) |
| C15 | C14 | C13 | 104.80 (16) | C8A  | C7A  | C6A  | 121.21 (19) |
| C9  | C10 | C11 | 120.27 (18) | N1A  | C13A | C14A | 112.41 (17) |
| C3  | C4  | C5  | 122.1 (2)   | N1A  | C13A | C16A | 120.73 (17) |
| C21 | C16 | C13 | 120.36 (18) | C14A | C13A | C16A | 126.83 (18) |
| C17 | C16 | C21 | 118.14 (19) | C3A  | C4A  | C5A  | 122.0 (2)   |
| C17 | C16 | C13 | 121.49 (18) | C15A | C14A | C13A | 104.45 (17) |
| C10 | C9  | C8  | 120.56 (19) | C2A  | C1A  | N2A  | 121.5 (2)   |
| C20 | C21 | C16 | 120.8 (2)   | C21A | C16A | C13A | 121.29 (18) |
| N1  | C13 | C14 | 112.20 (16) | C21A | C16A | C17A | 118.2 (2)   |
| N1  | C13 | C16 | 121.29 (16) | C17A | C16A | C13A | 120.53 (19) |
| C14 | C13 | C16 | 126.47 (17) | C1A  | C2A  | C3A  | 119.5 (2)   |
| C1  | C2  | C3  | 119.3 (2)   | C16A | C21A | C20A | 121.1 (2)   |
| C20 | C19 | C18 | 119.2 (2)   | C19A | C20A | C21A | 120.6 (2)   |
| C19 | C20 | C21 | 120.4 (2)   | C4A  | C3A  | C2A  | 119.1 (2)   |
| C4  | C3  | C2  | 119.4 (2)   | C18A | C17A | C16A | 120.4 (2)   |
| C16 | C17 | C18 | 121.1 (2)   | C20A | C19A | C18A | 119.0 (2)   |
| C19 | C18 | C17 | 120.3 (2)   | C17A | C18A | C19A | 120.8 (2)   |

**Table S21 Torsion Angles for 11.**

| A   | B   | C   | D   | Angle/°      |
|-----|-----|-----|-----|--------------|
| C11 | C6  | C7  | C8  | -0.5 (3)     |
| C11 | C6  | C5  | N2  | 2.2 (3)      |
| C11 | C6  | C5  | C4  | -178.23 (18) |
| C11 | C10 | C9  | C8  | -0.7 (3)     |
| N2  | C15 | C12 | C11 | 1.6 (3)      |
| N2  | C15 | C12 | N1  | -176.84 (16) |
| N2  | C15 | C14 | C13 | 176.12 (19)  |
| N2  | C1  | C2  | C3  | 1.4 (3)      |
| N2  | C5  | C4  | C3  | 2.6 (3)      |
| C6  | C11 | C12 | N1  | 175.23 (17)  |
| C6  | C11 | C12 | C15 | -2.9 (3)     |
| C6  | C11 | C10 | C9  | 0.2 (3)      |
| C6  | C7  | C8  | C9  | 0.0 (3)      |
| C6  | C5  | C4  | C3  | -177.03 (19) |
| C15 | N2  | C1  | C2  | -178.74 (18) |
| C15 | N2  | C5  | C6  | -3.6 (3)     |
| C15 | N2  | C5  | C4  | 176.81 (16)  |
| C15 | C14 | C13 | N1  | 0.5 (2)      |
| C15 | C14 | C13 | C16 | -177.26 (18) |
| C7  | C6  | C5  | N2  | -178.58 (17) |
| C7  | C6  | C5  | C4  | 1.0 (3)      |
| C7  | C8  | C9  | C10 | 0.6 (3)      |
| C1  | N2  | C15 | C12 | -178.53 (17) |

|     |      |      |      |              |
|-----|------|------|------|--------------|
| C1  | N2   | C15  | C14  | 5.4 (3)      |
| C1  | N2   | C5   | C6   | 176.70 (16)  |
| C1  | N2   | C5   | C4   | -2.9 (3)     |
| C1  | C2   | C3   | C4   | -1.8 (3)     |
| C5  | N2   | C15  | C12  | 1.7 (3)      |
| C5  | N2   | C15  | C14  | -174.35 (19) |
| C5  | N2   | C1   | C2   | 1.0 (3)      |
| C5  | C6   | C7   | C8   | -179.76 (18) |
| C5  | C4   | C3   | C2   | -0.3 (3)     |
| C12 | C11  | C6   | C7   | -178.22 (17) |
| C12 | C11  | C6   | C5   | 1.1 (3)      |
| C12 | C11  | C10  | C9   | 178.71 (17)  |
| C12 | N1   | C13  | C14  | -0.5 (2)     |
| C12 | N1   | C13  | C16  | 177.44 (16)  |
| C12 | C15  | C14  | C13  | -0.4 (2)     |
| C14 | C15  | C12  | C11  | 178.54 (16)  |
| C14 | C15  | C12  | N1   | 0.1 (2)      |
| C10 | C11  | C6   | C7   | 0.4 (3)      |
| C10 | C11  | C6   | C5   | 179.68 (17)  |
| C10 | C11  | C12  | N1   | -3.3 (3)     |
| C10 | C11  | C12  | C15  | 178.51 (17)  |
| C16 | C21  | C20  | C19  | -0.2 (3)     |
| C16 | C17  | C18  | C19  | -0.6 (3)     |
| C21 | C16  | C13  | N1   | 167.03 (17)  |
| C21 | C16  | C13  | C14  | -15.3 (3)    |
| C21 | C16  | C17  | C18  | 1.3 (3)      |
| C13 | N1   | C12  | C11  | -178.04 (18) |
| C13 | N1   | C12  | C15  | 0.2 (2)      |
| C13 | C16  | C21  | C20  | 178.43 (18)  |
| C13 | C16  | C17  | C18  | -178.04 (18) |
| C20 | C19  | C18  | C17  | -0.5 (3)     |
| C17 | C16  | C21  | C20  | -0.9 (3)     |
| C17 | C16  | C13  | N1   | -13.6 (3)    |
| C17 | C16  | C13  | C14  | 164.01 (19)  |
| C18 | C19  | C20  | C21  | 0.9 (3)      |
| N2A | C5A  | C4A  | C3A  | 2.1 (3)      |
| N2A | C15A | C14A | C13A | 176.86 (19)  |
| N2A | C1A  | C2A  | C3A  | 1.1 (3)      |
| N1A | C12A | C11A | C6A  | 174.89 (17)  |
| N1A | C12A | C11A | C10A | -3.6 (3)     |
| N1A | C12A | C15A | N2A  | -177.39 (16) |
| N1A | C12A | C15A | C14A | 0.1 (2)      |
| N1A | C13A | C14A | C15A | 0.4 (2)      |
| N1A | C13A | C16A | C21A | -12.9 (3)    |
| N1A | C13A | C16A | C17A | 167.85 (17)  |
| C6A | C5A  | C4A  | C3A  | -177.37 (19) |
| C6A | C11A | C10A | C9A  | -0.7 (3)     |

|                  |              |
|------------------|--------------|
| C12AN1A C13AC14A | -0.3 (2)     |
| C12AN1A C13AC16A | 177.95 (16)  |
| C12AC11AC10AC9A  | 177.81 (18)  |
| C12AC15AC14AC13A | -0.3 (2)     |
| C5A N2A C15AC12A | 1.9 (3)      |
| C5A N2A C15AC14A | -174.93 (19) |
| C5A N2A C1A C2A  | 0.7 (3)      |
| C5A C6A C11AC12A | 2.5 (3)      |
| C5A C6A C11AC10A | -178.92 (17) |
| C5A C6A C7A C8A  | 179.16 (18)  |
| C5A C4A C3A C2A  | -0.4 (3)     |
| C11AC6A C5A N2A  | 0.0 (3)      |
| C11AC6A C5A C4A  | 179.43 (18)  |
| C11AC6A C7A C8A  | -1.3 (3)     |
| C11AC12AC15AN2A  | 0.8 (3)      |
| C11AC12AC15AC14A | 178.24 (17)  |
| C11AC10AC9A C8A  | -0.5 (3)     |
| C10AC9A C8A C7A  | 0.8 (3)      |
| C15AN2A C5A C6A  | -2.2 (3)     |
| C15AN2A C5A C4A  | 178.31 (17)  |
| C15AN2A C1A C2A  | -179.82 (18) |
| C15AC12AC11AC6A  | -2.9 (3)     |
| C15AC12AC11AC10A | 178.59 (17)  |
| C9A C8A C7A C6A  | 0.2 (3)      |
| C7A C6A C5A N2A  | 179.51 (17)  |
| C7A C6A C5A C4A  | -1.1 (3)     |
| C7A C6A C11AC12A | -177.01 (17) |
| C7A C6A C11AC10A | 1.6 (3)      |
| C13AN1A C12AC11A | -177.83 (18) |
| C13AN1A C12AC15A | 0.1 (2)      |
| C13AC16AC21AC20A | -177.46 (19) |
| C13AC16AC17AC18A | 177.99 (18)  |
| C14AC13AC16AC21A | 165.13 (19)  |
| C14AC13AC16AC17A | -14.2 (3)    |
| C1A N2A C5A C6A  | 177.23 (17)  |
| C1A N2A C5A C4A  | -2.2 (3)     |
| C1A N2A C15AC12A | -177.59 (17) |
| C1A N2A C15AC14A | 5.6 (3)      |
| C1A C2A C3A C4A  | -1.2 (3)     |
| C16AC13AC14AC15A | -177.77 (18) |
| C16AC21AC20AC19A | -0.8 (3)     |
| C16AC17AC18AC19A | -0.3 (3)     |
| C21AC16AC17AC18A | -1.3 (3)     |
| C21AC20AC19AC18A | -0.8 (3)     |
| C20AC19AC18AC17A | 1.4 (3)      |
| C17AC16AC21AC20A | 1.8 (3)      |

**Table S22 Hydrogen Atom Coordinates ( $\text{\AA}\times 10^4$ ) and Isotropic Displacement Parameters ( $\text{\AA}^2\times 10^3$ ) for **11**.**

| Atom | <i>x</i> | <i>y</i> | <i>z</i> | U(eq) |
|------|----------|----------|----------|-------|
| H7   | 6784     | 4763     | -206     | 51    |
| H1   | 4376     | 9308     | -1058    | 50    |
| H8   | 7223     | 3526     | 785      | 53    |
| H14  | 3716     | 9536     | -106     | 43    |
| H10  | 5595     | 5622     | 1751     | 44    |
| H4   | 6357     | 5795     | -1103    | 54    |
| H9   | 6635     | 3975     | 1767     | 50    |
| H21  | 2899     | 10900    | 560      | 50    |
| H2   | 4947     | 8970     | -2034    | 57    |
| H19  | 1581     | 10631    | 2100     | 62    |
| H20  | 1876     | 11797    | 1101     | 60    |
| H3   | 5934     | 7139     | -2063    | 60    |
| H17  | 3374     | 7717     | 2032     | 48    |
| H18  | 2342     | 8598     | 2566     | 56    |
| H10A | -552     | 5692     | -1820    | 43    |
| H9A  | -1582    | 4019     | -1846    | 49    |
| H8A  | -2167    | 3523     | -866     | 53    |
| H7A  | -1736    | 4737     | 131      | 51    |
| H4A  | -1359    | 5867     | 1018     | 56    |
| H14A | 1333     | 9526     | 66       | 46    |
| H1A  | 659      | 9305     | 1009     | 52    |
| H2A  | 66       | 9001     | 1972     | 58    |
| H21A | 1647     | 7779     | -2090    | 53    |
| H20A | 2681     | 8636     | -2623    | 63    |
| H3A  | -950     | 7223     | 1985     | 61    |
| H17A | 2169     | 10887    | -595     | 58    |
| H19A | 3468     | 10607    | -2149    | 71    |
| H18A | 3189     | 11759    | -1141    | 70    |
| H1B  | 4981     | 6885     | 2782     | 51    |
| H1C  | 4596     | 6821     | 2135     | 51    |
| H1AA | 433      | 6697     | -2131    | 84    |
| H1AB | 33       | 6977     | -2759    | 84    |

2,7-Diphenylpyrido[2,1-a]pyrrolo[3,2-c]isoquinoline (**13**)

Single crystals of **13** were growth from acetone/pentane. CCDC for **13** is **1412486**

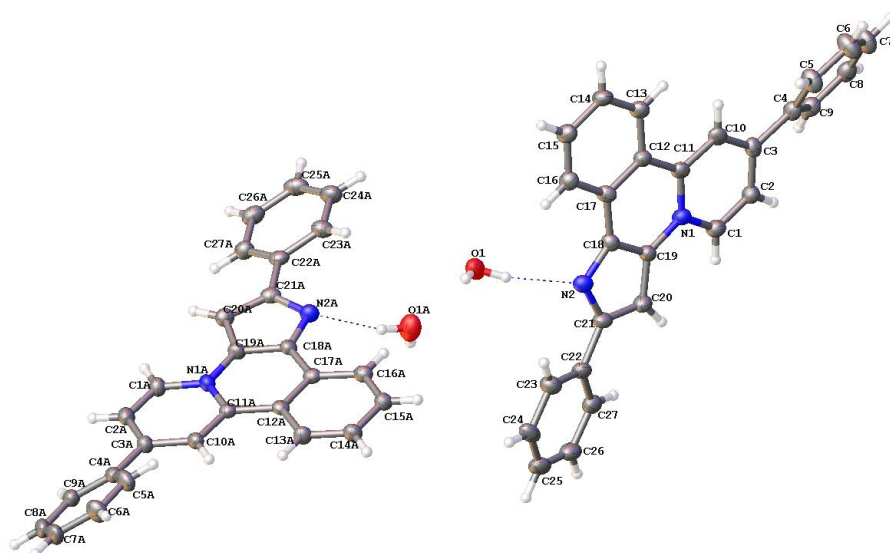

Molecular structure of compound **13**, displacement parameters are drawn at 50% probability level.

**Table S23 Crystal data and structure refinement for 13**

|                                                   |                                                                         |
|---------------------------------------------------|-------------------------------------------------------------------------|
| Formula                                           | 2(C <sub>27</sub> H <sub>18</sub> N <sub>2</sub> ), 2(H <sub>2</sub> O) |
| Crystal System                                    | Monoclinic                                                              |
| <i>a</i> (Å)                                      | 16.6795(12)                                                             |
| <i>b</i> (Å)                                      | 8.7264(8)                                                               |
| <i>c</i> (Å)                                      | 26.906(2)                                                               |
| $\beta$ (°)                                       | 101.297(7)                                                              |
| <i>V</i> (Å <sup>3</sup> )                        | 3840.4(5)                                                               |
| Molecular weight                                  | 776.90                                                                  |
| Space group                                       | <i>P</i> 2/ <i>c</i>                                                    |
| $\mu$ (mm <sup>-1</sup> )                         | 0.644                                                                   |
| Temperature (K)                                   | 100(2)                                                                  |
| <i>Z</i>                                          | 4                                                                       |
| <i>D</i> <sub>calc</sub> (g/cm <sup>3</sup> )     | 1.344                                                                   |
| Crystal size (mm <sup>3</sup> )                   | 0.25×0.18×0.14                                                          |
| Radiation                                         | CuK $\alpha$                                                            |
| Total reflections                                 | 30214                                                                   |
| Unique reflections                                | 7285                                                                    |
| Angle range 2 $\theta$ (°)                        | 6.7-139.992                                                             |
| F(000)                                            | 1632.0                                                                  |
| Index ranges                                      | -20 ≤ <i>h</i> ≤ 19, -10 ≤ <i>k</i> ≤ 10, -32 ≤ <i>l</i> ≤ 32           |
| Reflections with $ F_o  \geq 4\sigma_F$           | 2956                                                                    |
| <i>R</i> <sub>int</sub>                           | 0.1615                                                                  |
| <i>R</i> <sub><math>\sigma</math></sub>           | 0.1578                                                                  |
| <i>R</i> <sub>1</sub> ( $ F_o  \geq 4\sigma_F$ )  | 0.0723                                                                  |
| <i>wR</i> <sub>2</sub> ( $ F_o  \geq 4\sigma_F$ ) | 0.1604                                                                  |
| <i>R</i> <sub>1</sub> (all data)                  | 0.1812                                                                  |

$wR_2$  (all data) 0.2400  
 $S$  1.010  
 $\rho_{\min}, \rho_{\max}, e/\text{\AA}^3$  0.34/-0.30  
 $R_1 = \Sigma||F_o| - |F_c||/\Sigma|F_o|$ ;  $wR_2 = \{\Sigma[w(F_o^2 - F_c^2)^2]/\Sigma[w(F_o^2)^2]\}^{1/2}$ ;  
 $w = 1/[\sigma^2(F_o^2) + (aP)^2 + bP]$ , where  $P = (F_o^2 + 2F_c^2)/3$ ;  $s = \{\Sigma[w(F_o^2 - F_c^2)]/(n - p)\}^{1/2}$   
 where  $n$  is the number of reflections and  $p$  is the number of refinement parameters.

**Table S24 Fractional Atomic Coordinates ( $\times 10^4$ ) and Equivalent Isotropic Displacement Parameters ( $\text{\AA}^2 \times 10^3$ ) for 13.  $U_{eq}$  is defined as 1/3 of the trace of the orthogonalised  $U_{ij}$  tensor.**

| Atom              | $x$      | $y$      | $z$         | $U(eq)$   |
|-------------------|----------|----------|-------------|-----------|
| N <sup>(1)</sup>  | 2628 (2) | 3210 (5) | 7767.9 (15) | 25.8 (9)  |
| N <sup>(2)</sup>  | 3085 (2) | 3018 (5) | 6516.4 (15) | 26.8 (9)  |
| C <sup>(1)</sup>  | 2942 (3) | 4025 (6) | 8203.2 (18) | 29.8 (11) |
| C <sup>(2)</sup>  | 2646 (3) | 3809 (6) | 8636.8 (17) | 27.4 (11) |
| C <sup>(3)</sup>  | 2029 (3) | 2705 (6) | 8651.1 (17) | 27.1 (10) |
| C <sup>(4)</sup>  | 1731 (3) | 2358 (7) | 9123.2 (17) | 29.0 (11) |
| C <sup>(5)</sup>  | 1519 (4) | 861 (7)  | 9220.9 (19) | 37.0 (13) |
| C <sup>(6)</sup>  | 1239 (4) | 528 (8)  | 9667 (2)    | 44.8 (15) |
| C <sup>(7)</sup>  | 1161 (4) | 1689 (7) | 10006 (2)   | 41.8 (14) |
| C <sup>(8)</sup>  | 1378 (3) | 3181 (7) | 9909.9 (19) | 33.4 (12) |
| C <sup>(9)</sup>  | 1674 (3) | 3514 (6) | 9475.3 (18) | 29.6 (11) |
| C <sup>(10)</sup> | 1709 (3) | 1951 (6) | 8210.1 (18) | 27.0 (11) |
| C <sup>(11)</sup> | 1987 (3) | 2192 (6) | 7752.1 (18) | 25 (1)    |
| C <sup>(12)</sup> | 1643 (3) | 1424 (6) | 7286.7 (18) | 26.2 (10) |
| C <sup>(13)</sup> | 961 (3)  | 415 (6)  | 7258.9 (18) | 28.6 (11) |
| C <sup>(14)</sup> | 615 (3)  | -279 (7) | 6813.7 (19) | 31.7 (12) |
| C <sup>(15)</sup> | 931 (3)  | -8 (7)   | 6370.8 (18) | 32.7 (12) |
| C <sup>(16)</sup> | 1590 (3) | 933 (6)  | 6384.0 (18) | 29.2 (11) |
| C <sup>(17)</sup> | 1955 (3) | 1672 (6) | 6837.8 (18) | 25.9 (10) |
| C <sup>(18)</sup> | 2643 (3) | 2667 (6) | 6873.8 (17) | 26 (1)    |
| C <sup>(19)</sup> | 2964 (3) | 3434 (6) | 7333.6 (17) | 27.4 (11) |
| C <sup>(20)</sup> | 3638 (3) | 4312 (6) | 7256.1 (18) | 29.6 (11) |
| C <sup>(21)</sup> | 3681 (3) | 4005 (6) | 6748.1 (19) | 29.9 (11) |
| C <sup>(22)</sup> | 4277 (3) | 4636 (7) | 6468.2 (19) | 31.0 (12) |
| C <sup>(23)</sup> | 4377 (3) | 3963 (7) | 6016 (2)    | 34.0 (12) |
| C <sup>(24)</sup> | 4938 (3) | 4567 (7) | 5738 (2)    | 37.8 (13) |
| C <sup>(25)</sup> | 5396 (3) | 5856 (7) | 5918 (2)    | 41.5 (14) |
| C <sup>(26)</sup> | 5296 (3) | 6526 (7) | 6369 (2)    | 40.8 (14) |
| C <sup>(27)</sup> | 4747 (3) | 5925 (7) | 6650 (2)    | 34.1 (12) |
| N <sup>(1A)</sup> | 2389 (2) | 2465 (5) | 2194.6 (14) | 25.9 (9)  |
| N <sup>(2A)</sup> | 1944 (2) | 2301 (5) | 3447.4 (15) | 27.2 (9)  |
| C <sup>(1A)</sup> | 2076 (3) | 3238 (6) | 1756.9 (17) | 27.5 (11) |
| C <sup>(2A)</sup> | 2363 (3) | 3037 (6) | 1319.7 (18) | 30.3 (11) |
| C <sup>(3A)</sup> | 3006 (3) | 1987 (6) | 1307.5 (17) | 27.0 (11) |
| C <sup>(4A)</sup> | 3320 (3) | 1645 (6) | 842.7 (17)  | 26.5 (11) |
| C <sup>(5A)</sup> | 3617 (4) | 204 (7)  | 773.8 (18)  | 37.8 (13) |
| C <sup>(6A)</sup> | 3947 (4) | -110 (7) | 347.9 (19)  | 39.2 (14) |

|                    |          |           |             |           |
|--------------------|----------|-----------|-------------|-----------|
| C <sup>(7A)</sup>  | 3947 (3) | 1020 (8)  | -18.0 (19)  | 42.1 (16) |
| C <sup>(8A)</sup>  | 3646 (3) | 2458 (8)  | 49.0 (18)   | 38.5 (14) |
| C <sup>(9A)</sup>  | 3321 (3) | 2779 (7)  | 479.0 (17)  | 32.1 (12) |
| C <sup>(10A)</sup> | 3328 (3) | 1243 (6)  | 1757.5 (17) | 26.6 (11) |
| C <sup>(11A)</sup> | 3036 (3) | 1460 (6)  | 2211.7 (17) | 23.9 (10) |
| C <sup>(12A)</sup> | 3383 (3) | 689 (6)   | 2678.6 (17) | 22.3 (9)  |
| C <sup>(13A)</sup> | 4042 (3) | -358 (6)  | 2701.4 (17) | 27.7 (11) |
| C <sup>(14A)</sup> | 4376 (3) | -1080 (7) | 3146.4 (18) | 30.4 (12) |
| C <sup>(15A)</sup> | 4055 (3) | -837 (6)  | 3588.6 (18) | 28.7 (11) |
| C <sup>(16A)</sup> | 3409 (3) | 151 (6)   | 3574.5 (17) | 27.6 (11) |
| C <sup>(17A)</sup> | 3060 (3) | 921 (6)   | 3127.5 (17) | 22.7 (10) |
| C <sup>(18A)</sup> | 2380 (3) | 1928 (6)  | 3085.6 (17) | 23.1 (10) |
| C <sup>(19A)</sup> | 2051 (3) | 2693 (6)  | 2623.8 (17) | 25.6 (10) |
| C <sup>(20A)</sup> | 1376 (3) | 3550 (6)  | 2699.6 (18) | 27.2 (10) |
| C <sup>(21A)</sup> | 1339 (3) | 3274 (6)  | 3211.1 (18) | 25.1 (10) |
| C <sup>(22A)</sup> | 745 (3)  | 3945 (6)  | 3486.1 (18) | 27.7 (11) |
| C <sup>(23A)</sup> | 617 (3)  | 3298 (7)  | 3941.0 (19) | 31.8 (12) |
| C <sup>(24A)</sup> | 75 (3)   | 3950 (7)  | 4213 (2)    | 36.9 (13) |
| C <sup>(25A)</sup> | -376 (3) | 5242 (7)  | 4028 (2)    | 35.3 (12) |
| C <sup>(26A)</sup> | -252 (3) | 5882 (7)  | 3578 (2)    | 35.0 (12) |
| C <sup>(27A)</sup> | 295 (3)  | 5234 (6)  | 3304.2 (18) | 30.5 (11) |
| O <sup>(1)</sup>   | 2150 (2) | 3540 (6)  | 5483.3 (15) | 45.4 (11) |
| O <sup>(1A)</sup>  | 2746 (3) | 2680 (5)  | 4523.6 (15) | 47.1 (11) |

**Table S25 Anisotropic Displacement Parameters ( $\text{\AA}^2 \times 10^3$ ) for 13. The Anisotropic displacement factor exponent takes the form:  $-2\pi^2[h^2a^{*2}U_{11}+2hka^*b^*U_{12}+\dots]$ .**

| Atom              | U <sub>11</sub> | U <sub>22</sub> | U <sub>33</sub> | U <sub>23</sub> | U <sub>13</sub> | U <sub>12</sub> |
|-------------------|-----------------|-----------------|-----------------|-----------------|-----------------|-----------------|
| N <sup>(1)</sup>  | 21.8 (19)       | 28 (2)          | 27.7 (19)       | -3.2 (17)       | 6.0 (15)        | 0.1 (18)        |
| N <sup>(2)</sup>  | 25 (2)          | 25 (2)          | 31 (2)          | -2.0 (18)       | 8.8 (15)        | 2.3 (19)        |
| C <sup>(1)</sup>  | 24 (2)          | 34 (3)          | 31 (2)          | -1 (2)          | 5.7 (18)        | -1 (2)          |
| C <sup>(2)</sup>  | 26 (2)          | 30 (3)          | 26 (2)          | -2 (2)          | 4.8 (18)        | 1 (2)           |
| C <sup>(3)</sup>  | 31 (2)          | 27 (3)          | 24 (2)          | 3 (2)           | 7.5 (18)        | 7 (2)           |
| C <sup>(4)</sup>  | 28 (2)          | 36 (3)          | 24 (2)          | -6 (2)          | 7.7 (18)        | 4 (2)           |
| C <sup>(5)</sup>  | 52 (3)          | 34 (3)          | 29 (3)          | -4 (2)          | 15 (2)          | 2 (3)           |
| C <sup>(6)</sup>  | 65 (4)          | 39 (4)          | 36 (3)          | -1 (3)          | 24 (3)          | -3 (3)          |
| C <sup>(7)</sup>  | 54 (4)          | 46 (4)          | 30 (3)          | -2 (3)          | 18 (2)          | 3 (3)           |
| C <sup>(8)</sup>  | 28 (3)          | 43 (4)          | 29 (2)          | -4 (2)          | 5.8 (19)        | 7 (3)           |
| C <sup>(9)</sup>  | 29 (2)          | 29 (3)          | 31 (2)          | -4 (2)          | 6.6 (19)        | 3 (2)           |
| C <sup>(10)</sup> | 23 (2)          | 29 (3)          | 30 (2)          | 1 (2)           | 10.1 (18)       | 9 (2)           |
| C <sup>(11)</sup> | 21 (2)          | 26 (3)          | 29 (2)          | 0 (2)           | 8.3 (17)        | 4 (2)           |
| C <sup>(12)</sup> | 22 (2)          | 29 (3)          | 28 (2)          | 0 (2)           | 6.1 (17)        | 1 (2)           |
| C <sup>(13)</sup> | 25 (2)          | 34 (3)          | 29 (2)          | -3 (2)          | 10.8 (17)       | 2 (2)           |
| C <sup>(14)</sup> | 23 (2)          | 38 (3)          | 35 (3)          | -1 (2)          | 8.2 (18)        | -4 (2)          |
| C <sup>(15)</sup> | 28 (3)          | 42 (3)          | 29 (2)          | -8 (2)          | 7.4 (19)        | -1 (2)          |
| C <sup>(16)</sup> | 28 (2)          | 32 (3)          | 28 (2)          | -5 (2)          | 7.7 (18)        | 1 (2)           |



|                    |        |        |           |           |           |           |
|--------------------|--------|--------|-----------|-----------|-----------|-----------|
| C <sup>(17)</sup>  | 26 (2) | 25 (3) | 30 (2)    | -4 (2)    | 12.2 (18) | 1 (2)     |
| C <sup>(18)</sup>  | 26 (2) | 27 (3) | 26 (2)    | -1 (2)    | 9.6 (17)  | 3 (2)     |
| C <sup>(19)</sup>  | 24 (2) | 35 (3) | 24 (2)    | 2 (2)     | 7.6 (17)  | -2 (2)    |
| C <sup>(20)</sup>  | 26 (2) | 32 (3) | 31 (2)    | 2 (2)     | 4.1 (18)  | -4 (2)    |
| C <sup>(21)</sup>  | 23 (2) | 32 (3) | 36 (3)    | 5 (2)     | 7.6 (19)  | -4 (2)    |
| C <sup>(22)</sup>  | 22 (2) | 39 (3) | 33 (2)    | 4 (2)     | 7.9 (18)  | 1 (2)     |
| C <sup>(23)</sup>  | 31 (3) | 36 (3) | 37 (3)    | 3 (2)     | 13 (2)    | 1 (3)     |
| C <sup>(24)</sup>  | 32 (3) | 46 (4) | 41 (3)    | 14 (3)    | 19 (2)    | 11 (3)    |
| C <sup>(25)</sup>  | 24 (2) | 53 (4) | 49 (3)    | 13 (3)    | 10 (2)    | 3 (3)     |
| C <sup>(26)</sup>  | 28 (3) | 44 (4) | 49 (3)    | 13 (3)    | 5 (2)     | -6 (3)    |
| C <sup>(27)</sup>  | 26 (2) | 38 (3) | 38 (3)    | 7 (2)     | 4.1 (19)  | 3 (2)     |
| N <sup>(1A)</sup>  | 25 (2) | 33 (3) | 20.1 (18) | 2.8 (17)  | 5.7 (14)  | -1.5 (19) |
| N <sup>(2A)</sup>  | 25 (2) | 30 (2) | 27.3 (19) | -1.7 (18) | 8.6 (15)  | 2.5 (19)  |
| C <sup>(1A)</sup>  | 29 (2) | 30 (3) | 23 (2)    | 3 (2)     | 4.8 (17)  | 2 (2)     |
| C <sup>(2A)</sup>  | 29 (2) | 35 (3) | 27 (2)    | 8 (2)     | 3.7 (18)  | -3 (2)    |
| C <sup>(3A)</sup>  | 26 (2) | 32 (3) | 23 (2)    | 3 (2)     | 5.7 (17)  | 0 (2)     |
| C <sup>(4A)</sup>  | 23 (2) | 36 (3) | 21 (2)    | 4 (2)     | 3.5 (16)  | -5 (2)    |
| C <sup>(5A)</sup>  | 45 (3) | 48 (4) | 22 (2)    | 2 (2)     | 12 (2)    | -5 (3)    |
| C <sup>(6A)</sup>  | 46 (3) | 46 (4) | 30 (3)    | -2 (2)    | 18 (2)    | 4 (3)     |
| C <sup>(7A)</sup>  | 35 (3) | 71 (5) | 22 (2)    | 9 (3)     | 10 (2)    | 2 (3)     |
| C <sup>(8A)</sup>  | 32 (3) | 61 (4) | 21 (2)    | 12 (3)    | 0.6 (19)  | -5 (3)    |
| C <sup>(9A)</sup>  | 24 (2) | 48 (4) | 24 (2)    | 6 (2)     | 4.4 (18)  | -2 (2)    |
| C <sup>(10A)</sup> | 23 (2) | 36 (3) | 21 (2)    | 2 (2)     | 5.2 (17)  | -2 (2)    |
| C <sup>(11A)</sup> | 20 (2) | 25 (3) | 27 (2)    | 1 (2)     | 4.7 (16)  | -3 (2)    |
| C <sup>(12A)</sup> | 21 (2) | 20 (2) | 26 (2)    | 1.2 (19)  | 6.2 (16)  | -4 (2)    |
| C <sup>(13A)</sup> | 26 (2) | 32 (3) | 27 (2)    | 1 (2)     | 9.3 (17)  | 6 (2)     |
| C <sup>(14A)</sup> | 27 (2) | 38 (3) | 28 (2)    | 2 (2)     | 9.8 (19)  | 3 (2)     |
| C <sup>(15A)</sup> | 26 (2) | 32 (3) | 28 (2)    | 5 (2)     | 6.6 (18)  | 0 (2)     |
| C <sup>(16A)</sup> | 25 (2) | 32 (3) | 27 (2)    | -3 (2)    | 8.2 (17)  | -3 (2)    |
| C <sup>(17A)</sup> | 21 (2) | 22 (3) | 25 (2)    | -2.0 (19) | 5.0 (17)  | -3 (2)    |
| C <sup>(18A)</sup> | 21 (2) | 23 (3) | 25 (2)    | 4.2 (19)  | 6.8 (16)  | -1 (2)    |
| C <sup>(19A)</sup> | 24 (2) | 30 (3) | 24 (2)    | 1 (2)     | 8.9 (17)  | 2 (2)     |
| C <sup>(20A)</sup> | 27 (2) | 24 (3) | 30 (2)    | 1 (2)     | 5.8 (18)  | 2 (2)     |
| C <sup>(21A)</sup> | 23 (2) | 21 (2) | 32 (2)    | -4 (2)    | 8.1 (17)  | -3 (2)    |
| C <sup>(22A)</sup> | 21 (2) | 31 (3) | 32 (2)    | -3 (2)    | 6.3 (18)  | -6 (2)    |
| C <sup>(23A)</sup> | 29 (3) | 33 (3) | 36 (3)    | -1 (2)    | 13 (2)    | -2 (2)    |
| C <sup>(24A)</sup> | 29 (3) | 50 (4) | 35 (3)    | -2 (3)    | 12 (2)    | -1 (3)    |
| C <sup>(25A)</sup> | 28 (2) | 40 (3) | 42 (3)    | -12 (3)   | 15 (2)    | -3 (3)    |
| C <sup>(26A)</sup> | 25 (2) | 36 (3) | 43 (3)    | -4 (2)    | 5 (2)     | 2 (2)     |
| C <sup>(27A)</sup> | 26 (2) | 37 (3) | 29 (2)    | -3 (2)    | 6.4 (18)  | 2 (2)     |
| O <sup>(1)</sup>   | 34 (2) | 62 (3) | 41 (2)    | 22 (2)    | 9.9 (16)  | 11 (2)    |
| O <sup>(1A)</sup>  | 49 (2) | 59 (3) | 33.0 (19) | -5.3 (19) | 8.2 (17)  | 16 (2)    |

**Table S26 Bond Lengths for 13.**

**Atom Atom Length/Å Atom Atom Length/Å**

|                   |                   |           |                    |                    |           |
|-------------------|-------------------|-----------|--------------------|--------------------|-----------|
| N <sup>(1)</sup>  | C <sup>(1)</sup>  | 1.383 (6) | N <sup>(1A)</sup>  | C <sup>(1A)</sup>  | 1.369 (6) |
| N <sup>(1)</sup>  | C <sup>(11)</sup> | 1.384 (6) | N <sup>(1A)</sup>  | C <sup>(11A)</sup> | 1.385 (6) |
| N <sup>(1)</sup>  | C <sup>(19)</sup> | 1.405 (6) | N <sup>(1A)</sup>  | C <sup>(19A)</sup> | 1.395 (6) |
| N <sup>(2)</sup>  | C <sup>(18)</sup> | 1.356 (6) | N <sup>(2A)</sup>  | C <sup>(18A)</sup> | 1.363 (6) |
| N <sup>(2)</sup>  | C <sup>(21)</sup> | 1.370 (7) | N <sup>(2A)</sup>  | C <sup>(21A)</sup> | 1.376 (6) |
| C <sup>(1)</sup>  | C <sup>(2)</sup>  | 1.366 (7) | C <sup>(1A)</sup>  | C <sup>(2A)</sup>  | 1.366 (7) |
| C <sup>(2)</sup>  | C <sup>(3)</sup>  | 1.415 (7) | C <sup>(2A)</sup>  | C <sup>(3A)</sup>  | 1.416 (7) |
| C <sup>(3)</sup>  | C <sup>(4)</sup>  | 1.483 (7) | C <sup>(3A)</sup>  | C <sup>(4A)</sup>  | 1.477 (6) |
| C <sup>(3)</sup>  | C <sup>(10)</sup> | 1.370 (7) | C <sup>(3A)</sup>  | C <sup>(10A)</sup> | 1.386 (7) |
| C <sup>(4)</sup>  | C <sup>(5)</sup>  | 1.392 (8) | C <sup>(4A)</sup>  | C <sup>(5A)</sup>  | 1.378 (8) |
| C <sup>(4)</sup>  | C <sup>(9)</sup>  | 1.400 (7) | C <sup>(4A)</sup>  | C <sup>(9A)</sup>  | 1.392 (7) |
| C <sup>(5)</sup>  | C <sup>(6)</sup>  | 1.401 (7) | C <sup>(5A)</sup>  | C <sup>(6A)</sup>  | 1.392 (7) |
| C <sup>(6)</sup>  | C <sup>(7)</sup>  | 1.386 (8) | C <sup>(6A)</sup>  | C <sup>(7A)</sup>  | 1.394 (8) |
| C <sup>(7)</sup>  | C <sup>(8)</sup>  | 1.389 (8) | C <sup>(7A)</sup>  | C <sup>(8A)</sup>  | 1.376 (9) |
| C <sup>(8)</sup>  | C <sup>(9)</sup>  | 1.386 (7) | C <sup>(8A)</sup>  | C <sup>(9A)</sup>  | 1.399 (7) |
| C <sup>(10)</sup> | C <sup>(11)</sup> | 1.415 (7) | C <sup>(10A)</sup> | C <sup>(11A)</sup> | 1.414 (6) |
| C <sup>(11)</sup> | C <sup>(12)</sup> | 1.437 (7) | C <sup>(11A)</sup> | C <sup>(12A)</sup> | 1.442 (6) |
| C <sup>(12)</sup> | C <sup>(13)</sup> | 1.429 (7) | C <sup>(12A)</sup> | C <sup>(13A)</sup> | 1.422 (7) |
| C <sup>(12)</sup> | C <sup>(17)</sup> | 1.422 (7) | C <sup>(12A)</sup> | C <sup>(17A)</sup> | 1.430 (6) |
| C <sup>(13)</sup> | C <sup>(14)</sup> | 1.365 (7) | C <sup>(13A)</sup> | C <sup>(14A)</sup> | 1.371 (7) |
| C <sup>(14)</sup> | C <sup>(15)</sup> | 1.413 (7) | C <sup>(14A)</sup> | C <sup>(15A)</sup> | 1.413 (7) |
| C <sup>(15)</sup> | C <sup>(16)</sup> | 1.367 (7) | C <sup>(15A)</sup> | C <sup>(16A)</sup> | 1.375 (7) |
| C <sup>(16)</sup> | C <sup>(17)</sup> | 1.409 (7) | C <sup>(16A)</sup> | C <sup>(17A)</sup> | 1.401 (7) |
| C <sup>(17)</sup> | C <sup>(18)</sup> | 1.427 (7) | C <sup>(17A)</sup> | C <sup>(18A)</sup> | 1.422 (7) |
| C <sup>(18)</sup> | C <sup>(19)</sup> | 1.416 (7) | C <sup>(18A)</sup> | C <sup>(19A)</sup> | 1.422 (6) |
| C <sup>(19)</sup> | C <sup>(20)</sup> | 1.411 (7) | C <sup>(19A)</sup> | C <sup>(20A)</sup> | 1.399 (7) |
| C <sup>(20)</sup> | C <sup>(21)</sup> | 1.408 (7) | C <sup>(20A)</sup> | C <sup>(21A)</sup> | 1.410 (7) |
| C <sup>(21)</sup> | C <sup>(22)</sup> | 1.467 (7) | C <sup>(21A)</sup> | C <sup>(22A)</sup> | 1.469 (6) |
| C <sup>(22)</sup> | C <sup>(23)</sup> | 1.390 (7) | C <sup>(22A)</sup> | C <sup>(23A)</sup> | 1.402 (7) |
| C <sup>(22)</sup> | C <sup>(27)</sup> | 1.403 (8) | C <sup>(22A)</sup> | C <sup>(27A)</sup> | 1.387 (7) |
| C <sup>(23)</sup> | C <sup>(24)</sup> | 1.409 (7) | C <sup>(23A)</sup> | C <sup>(24A)</sup> | 1.390 (7) |
| C <sup>(24)</sup> | C <sup>(25)</sup> | 1.392 (9) | C <sup>(24A)</sup> | C <sup>(25A)</sup> | 1.391 (8) |
| C <sup>(25)</sup> | C <sup>(26)</sup> | 1.388 (9) | C <sup>(25A)</sup> | C <sup>(26A)</sup> | 1.387 (8) |
| C <sup>(26)</sup> | C <sup>(27)</sup> | 1.397 (7) | C <sup>(26A)</sup> | C <sup>(27A)</sup> | 1.399 (7) |

**Table S27 Bond Angles for 13.**

| Atom              | Atom             | Atom              | Angle/°   | Atom               | Atom              | Atom               | Angle/°   |
|-------------------|------------------|-------------------|-----------|--------------------|-------------------|--------------------|-----------|
| C <sup>(1)</sup>  | N <sup>(1)</sup> | C <sup>(11)</sup> | 121.2 (4) | C <sup>(1A)</sup>  | N <sup>(1A)</sup> | C <sup>(11A)</sup> | 120.3 (4) |
| C <sup>(1)</sup>  | N <sup>(1)</sup> | C <sup>(19)</sup> | 119.1 (4) | C <sup>(1A)</sup>  | N <sup>(1A)</sup> | C <sup>(19A)</sup> | 119.6 (4) |
| C <sup>(11)</sup> | N <sup>(1)</sup> | C <sup>(19)</sup> | 119.7 (4) | C <sup>(11A)</sup> | N <sup>(1A)</sup> | C <sup>(19A)</sup> | 120.1 (4) |
| C <sup>(18)</sup> | N <sup>(2)</sup> | C <sup>(21)</sup> | 105.5 (4) | C <sup>(18A)</sup> | N <sup>(2A)</sup> | C <sup>(21A)</sup> | 105.2 (4) |
| C <sup>(2)</sup>  | C <sup>(1)</sup> | N <sup>(1)</sup>  | 120.7 (5) | C <sup>(2A)</sup>  | C <sup>(1A)</sup> | N <sup>(1A)</sup>  | 122.6 (5) |
| C <sup>(1)</sup>  | C <sup>(2)</sup> | C <sup>(3)</sup>  | 120.3 (5) | C <sup>(1A)</sup>  | C <sup>(2A)</sup> | C <sup>(3A)</sup>  | 119.9 (5) |
| C <sup>(2)</sup>  | C <sup>(3)</sup> | C <sup>(4)</sup>  | 122.0 (5) | C <sup>(2A)</sup>  | C <sup>(3A)</sup> | C <sup>(4A)</sup>  | 123.1 (4) |
| C <sup>(10)</sup> | C <sup>(3)</sup> | C <sup>(2)</sup>  | 117.7 (4) | C <sup>(10A)</sup> | C <sup>(3A)</sup> | C <sup>(2A)</sup>  | 116.6 (4) |

|                   |                   |                   |           |                    |                    |                    |           |
|-------------------|-------------------|-------------------|-----------|--------------------|--------------------|--------------------|-----------|
| C <sup>(10)</sup> | C <sup>(3)</sup>  | C <sup>(4)</sup>  | 120.3 (5) | C <sup>(10A)</sup> | C <sup>(3A)</sup>  | C <sup>(4A)</sup>  | 120.3 (5) |
| C <sup>(5)</sup>  | C <sup>(4)</sup>  | C <sup>(3)</sup>  | 119.6 (5) | C <sup>(5A)</sup>  | C <sup>(4A)</sup>  | C <sup>(3A)</sup>  | 119.7 (5) |
| C <sup>(5)</sup>  | C <sup>(4)</sup>  | C <sup>(9)</sup>  | 119.7 (5) | C <sup>(5A)</sup>  | C <sup>(4A)</sup>  | C <sup>(9A)</sup>  | 120.3 (5) |
| C <sup>(9)</sup>  | C <sup>(4)</sup>  | C <sup>(3)</sup>  | 120.8 (5) | C <sup>(9A)</sup>  | C <sup>(4A)</sup>  | C <sup>(3A)</sup>  | 120.1 (5) |
| C <sup>(4)</sup>  | C <sup>(5)</sup>  | C <sup>(6)</sup>  | 119.7 (5) | C <sup>(4A)</sup>  | C <sup>(5A)</sup>  | C <sup>(6A)</sup>  | 120.1 (5) |
| C <sup>(7)</sup>  | C <sup>(6)</sup>  | C <sup>(5)</sup>  | 120.1 (6) | C <sup>(5A)</sup>  | C <sup>(6A)</sup>  | C <sup>(7A)</sup>  | 119.8 (6) |
| C <sup>(6)</sup>  | C <sup>(7)</sup>  | C <sup>(8)</sup>  | 120.1 (5) | C <sup>(8A)</sup>  | C <sup>(7A)</sup>  | C <sup>(6A)</sup>  | 120.1 (5) |
| C <sup>(9)</sup>  | C <sup>(8)</sup>  | C <sup>(7)</sup>  | 120.1 (5) | C <sup>(7A)</sup>  | C <sup>(8A)</sup>  | C <sup>(9A)</sup>  | 120.1 (5) |
| C <sup>(8)</sup>  | C <sup>(9)</sup>  | C <sup>(4)</sup>  | 120.2 (5) | C <sup>(4A)</sup>  | C <sup>(9A)</sup>  | C <sup>(8A)</sup>  | 119.6 (6) |
| C <sup>(3)</sup>  | C <sup>(10)</sup> | C <sup>(11)</sup> | 122.9 (5) | C <sup>(3A)</sup>  | C <sup>(10A)</sup> | C <sup>(11A)</sup> | 123.6 (5) |
| N <sup>(1)</sup>  | C <sup>(11)</sup> | C <sup>(10)</sup> | 116.9 (4) | N <sup>(1A)</sup>  | C <sup>(11A)</sup> | C <sup>(10A)</sup> | 117.0 (4) |
| N <sup>(1)</sup>  | C <sup>(11)</sup> | C <sup>(12)</sup> | 120.0 (4) | N <sup>(1A)</sup>  | C <sup>(11A)</sup> | C <sup>(12A)</sup> | 120.1 (4) |
| C <sup>(10)</sup> | C <sup>(11)</sup> | C <sup>(12)</sup> | 123.1 (5) | C <sup>(10A)</sup> | C <sup>(11A)</sup> | C <sup>(12A)</sup> | 122.9 (5) |
| C <sup>(13)</sup> | C <sup>(12)</sup> | C <sup>(11)</sup> | 120.7 (4) | C <sup>(13A)</sup> | C <sup>(12A)</sup> | C <sup>(11A)</sup> | 120.8 (4) |
| C <sup>(17)</sup> | C <sup>(12)</sup> | C <sup>(11)</sup> | 121.3 (5) | C <sup>(13A)</sup> | C <sup>(12A)</sup> | C <sup>(17A)</sup> | 118.1 (4) |
| C <sup>(17)</sup> | C <sup>(12)</sup> | C <sup>(13)</sup> | 118.0 (5) | C <sup>(17A)</sup> | C <sup>(12A)</sup> | C <sup>(11A)</sup> | 121.1 (4) |
| C <sup>(14)</sup> | C <sup>(13)</sup> | C <sup>(12)</sup> | 121.0 (4) | C <sup>(14A)</sup> | C <sup>(13A)</sup> | C <sup>(12A)</sup> | 120.8 (4) |
| C <sup>(13)</sup> | C <sup>(14)</sup> | C <sup>(15)</sup> | 120.2 (5) | C <sup>(13A)</sup> | C <sup>(14A)</sup> | C <sup>(15A)</sup> | 120.7 (5) |
| C <sup>(16)</sup> | C <sup>(15)</sup> | C <sup>(14)</sup> | 120.6 (5) | C <sup>(16A)</sup> | C <sup>(15A)</sup> | C <sup>(14A)</sup> | 119.7 (5) |
| C <sup>(15)</sup> | C <sup>(16)</sup> | C <sup>(17)</sup> | 120.4 (4) | C <sup>(15A)</sup> | C <sup>(16A)</sup> | C <sup>(17A)</sup> | 121.1 (4) |
| C <sup>(12)</sup> | C <sup>(17)</sup> | C <sup>(18)</sup> | 117.3 (4) | C <sup>(16A)</sup> | C <sup>(17A)</sup> | C <sup>(12A)</sup> | 119.7 (5) |
| C <sup>(16)</sup> | C <sup>(17)</sup> | C <sup>(12)</sup> | 119.9 (5) | C <sup>(16A)</sup> | C <sup>(17A)</sup> | C <sup>(18A)</sup> | 123.7 (4) |
| C <sup>(16)</sup> | C <sup>(17)</sup> | C <sup>(18)</sup> | 122.9 (4) | C <sup>(18A)</sup> | C <sup>(17A)</sup> | C <sup>(12A)</sup> | 116.6 (4) |
| N <sup>(2)</sup>  | C <sup>(18)</sup> | C <sup>(17)</sup> | 129.1 (5) | N <sup>(2A)</sup>  | C <sup>(18A)</sup> | C <sup>(17A)</sup> | 128.3 (4) |
| N <sup>(2)</sup>  | C <sup>(18)</sup> | C <sup>(19)</sup> | 110.4 (5) | N <sup>(2A)</sup>  | C <sup>(18A)</sup> | C <sup>(19A)</sup> | 110.1 (4) |
| C <sup>(19)</sup> | C <sup>(18)</sup> | C <sup>(17)</sup> | 120.5 (4) | C <sup>(17A)</sup> | C <sup>(18A)</sup> | C <sup>(19A)</sup> | 121.6 (4) |
| N <sup>(1)</sup>  | C <sup>(19)</sup> | C <sup>(18)</sup> | 121.1 (5) | N <sup>(1A)</sup>  | C <sup>(19A)</sup> | C <sup>(18A)</sup> | 120.4 (4) |
| N <sup>(1)</sup>  | C <sup>(19)</sup> | C <sup>(20)</sup> | 131.2 (5) | N <sup>(1A)</sup>  | C <sup>(19A)</sup> | C <sup>(20A)</sup> | 131.6 (5) |
| C <sup>(20)</sup> | C <sup>(19)</sup> | C <sup>(18)</sup> | 107.7 (4) | C <sup>(20A)</sup> | C <sup>(19A)</sup> | C <sup>(18A)</sup> | 107.9 (4) |
| C <sup>(21)</sup> | C <sup>(20)</sup> | C <sup>(19)</sup> | 103.5 (4) | C <sup>(19A)</sup> | C <sup>(20A)</sup> | C <sup>(21A)</sup> | 104.0 (4) |
| N <sup>(2)</sup>  | C <sup>(21)</sup> | C <sup>(20)</sup> | 113.0 (4) | N <sup>(2A)</sup>  | C <sup>(21A)</sup> | C <sup>(20A)</sup> | 112.8 (4) |
| N <sup>(2)</sup>  | C <sup>(21)</sup> | C <sup>(22)</sup> | 120.5 (5) | N <sup>(2A)</sup>  | C <sup>(21A)</sup> | C <sup>(22A)</sup> | 121.3 (4) |
| C <sup>(20)</sup> | C <sup>(21)</sup> | C <sup>(22)</sup> | 126.5 (5) | C <sup>(20A)</sup> | C <sup>(21A)</sup> | C <sup>(22A)</sup> | 125.9 (5) |
| C <sup>(23)</sup> | C <sup>(22)</sup> | C <sup>(21)</sup> | 120.0 (5) | C <sup>(23A)</sup> | C <sup>(22A)</sup> | C <sup>(21A)</sup> | 120.9 (5) |
| C <sup>(23)</sup> | C <sup>(22)</sup> | C <sup>(27)</sup> | 119.2 (5) | C <sup>(27A)</sup> | C <sup>(22A)</sup> | C <sup>(21A)</sup> | 121.1 (5) |
| C <sup>(27)</sup> | C <sup>(22)</sup> | C <sup>(21)</sup> | 120.7 (5) | C <sup>(27A)</sup> | C <sup>(22A)</sup> | C <sup>(23A)</sup> | 118.1 (5) |
| C <sup>(22)</sup> | C <sup>(23)</sup> | C <sup>(24)</sup> | 120.8 (6) | C <sup>(24A)</sup> | C <sup>(23A)</sup> | C <sup>(22A)</sup> | 121.4 (5) |
| C <sup>(25)</sup> | C <sup>(24)</sup> | C <sup>(23)</sup> | 119.6 (6) | C <sup>(23A)</sup> | C <sup>(24A)</sup> | C <sup>(25A)</sup> | 120.4 (5) |
| C <sup>(26)</sup> | C <sup>(25)</sup> | C <sup>(24)</sup> | 119.5 (5) | C <sup>(26A)</sup> | C <sup>(25A)</sup> | C <sup>(24A)</sup> | 118.4 (5) |
| C <sup>(25)</sup> | C <sup>(26)</sup> | C <sup>(27)</sup> | 121.2 (6) | C <sup>(25A)</sup> | C <sup>(26A)</sup> | C <sup>(27A)</sup> | 121.4 (5) |
| C <sup>(26)</sup> | C <sup>(27)</sup> | C <sup>(22)</sup> | 119.6 (5) | C <sup>(22A)</sup> | C <sup>(27A)</sup> | C <sup>(26A)</sup> | 120.4 (5) |

**Table S28 Torsion Angles for 13.**

| A                | B                | C                | D                | Angle/° | A                 | B                 | C                 | D                 | Angle/° |
|------------------|------------------|------------------|------------------|---------|-------------------|-------------------|-------------------|-------------------|---------|
| N <sup>(1)</sup> | C <sup>(1)</sup> | C <sup>(2)</sup> | C <sup>(3)</sup> | 2.1 (8) | N <sup>(1A)</sup> | C <sup>(1A)</sup> | C <sup>(2A)</sup> | C <sup>(3A)</sup> | 0.4 (8) |

|                                       |            |                                           |            |
|---------------------------------------|------------|-------------------------------------------|------------|
| $N^{(1)} C^{(11)} C^{(12)} C^{(13)}$  | -177.6 (5) | $N^{(1A)} C^{(11A)} C^{(12A)} C^{(13A)}$  | 179.4 (5)  |
| $N^{(1)} C^{(11)} C^{(12)} C^{(17)}$  | 0.9 (8)    | $N^{(1A)} C^{(11A)} C^{(12A)} C^{(17A)}$  | 1.0 (7)    |
| $N^{(1)} C^{(19)} C^{(20)} C^{(21)}$  | 177.4 (6)  | $N^{(1A)} C^{(19A)} C^{(20A)} C^{(21A)}$  | 178.3 (6)  |
| $N^{(2)} C^{(18)} C^{(19)} N^{(1)}$   | -177.6 (5) | $N^{(2A)} C^{(18A)} C^{(19A)} N^{(1A)}$   | -178.8 (5) |
| $N^{(2)} C^{(18)} C^{(19)} C^{(20)}$  | 0.3 (6)    | $N^{(2A)} C^{(18A)} C^{(19A)} C^{(20A)}$  | -1.1 (6)   |
| $N^{(2)} C^{(21)} C^{(22)} C^{(23)}$  | -16.2 (8)  | $N^{(2A)} C^{(21A)} C^{(22A)} C^{(23A)}$  | -18.8 (8)  |
| $N^{(2)} C^{(21)} C^{(22)} C^{(27)}$  | 163.3 (5)  | $N^{(2A)} C^{(21A)} C^{(22A)} C^{(27A)}$  | 161.1 (5)  |
| $C^{(1)} N^{(1)} C^{(11)} C^{(10)}$   | -4.2 (7)   | $C^{(1A)} N^{(1A)} C^{(11A)} C^{(10A)}$   | -2.3 (7)   |
| $C^{(1)} N^{(1)} C^{(11)} C^{(12)}$   | 176.5 (5)  | $C^{(1A)} N^{(1A)} C^{(11A)} C^{(12A)}$   | 177.8 (5)  |
| $C^{(1)} N^{(1)} C^{(19)} C^{(18)}$   | -177.7 (5) | $C^{(1A)} N^{(1A)} C^{(19A)} C^{(18A)}$   | -178.5 (5) |
| $C^{(1)} N^{(1)} C^{(19)} C^{(20)}$   | 5.0 (9)    | $C^{(1A)} N^{(1A)} C^{(19A)} C^{(20A)}$   | 4.4 (9)    |
| $C^{(1)} C^{(2)} C^{(3)} C^{(4)}$     | 175.7 (5)  | $C^{(1A)} C^{(2A)} C^{(3A)} C^{(4A)}$     | 176.6 (5)  |
| $C^{(1)} C^{(2)} C^{(3)} C^{(10)}$    | -4.2 (8)   | $C^{(1A)} C^{(2A)} C^{(3A)} C^{(10A)}$    | -1.9 (8)   |
| $C^{(2)} C^{(3)} C^{(4)} C^{(5)}$     | -143.8 (5) | $C^{(2A)} C^{(3A)} C^{(4A)} C^{(5A)}$     | -148.1 (5) |
| $C^{(2)} C^{(3)} C^{(4)} C^{(9)}$     | 35.1 (8)   | $C^{(2A)} C^{(3A)} C^{(4A)} C^{(9A)}$     | 32.5 (8)   |
| $C^{(2)} C^{(3)} C^{(10)} C^{(11)}$   | 2.2 (8)    | $C^{(2A)} C^{(3A)} C^{(10A)} C^{(11A)}$   | 1.4 (8)    |
| $C^{(3)} C^{(4)} C^{(5)} C^{(6)}$     | 179.9 (5)  | $C^{(3A)} C^{(4A)} C^{(5A)} C^{(6A)}$     | -177.2 (5) |
| $C^{(3)} C^{(4)} C^{(9)} C^{(8)}$     | 178.6 (5)  | $C^{(3A)} C^{(4A)} C^{(9A)} C^{(8A)}$     | 177.8 (5)  |
| $C^{(3)} C^{(10)} C^{(11)} N^{(1)}$   | 1.9 (7)    | $C^{(3A)} C^{(10A)} C^{(11A)} N^{(1A)}$   | 0.7 (8)    |
| $C^{(3)} C^{(10)} C^{(11)} C^{(12)}$  | -178.8 (5) | $C^{(3A)} C^{(10A)} C^{(11A)} C^{(12A)}$  | -179.4 (5) |
| $C^{(4)} C^{(3)} C^{(10)} C^{(11)}$   | -177.7 (5) | $C^{(4A)} C^{(3A)} C^{(10A)} C^{(11A)}$   | -177.2 (5) |
| $C^{(4)} C^{(5)} C^{(6)} C^{(7)}$     | 0.9 (10)   | $C^{(4A)} C^{(5A)} C^{(6A)} C^{(7A)}$     | -2.4 (9)   |
| $C^{(5)} C^{(4)} C^{(9)} C^{(8)}$     | -2.5 (8)   | $C^{(5A)} C^{(4A)} C^{(9A)} C^{(8A)}$     | -1.6 (8)   |
| $C^{(5)} C^{(6)} C^{(7)} C^{(8)}$     | -1.4 (10)  | $C^{(5A)} C^{(6A)} C^{(7A)} C^{(8A)}$     | 2.0 (9)    |
| $C^{(6)} C^{(7)} C^{(8)} C^{(9)}$     | -0.1 (9)   | $C^{(6A)} C^{(7A)} C^{(8A)} C^{(9A)}$     | -1.5 (9)   |
| $C^{(7)} C^{(8)} C^{(9)} C^{(4)}$     | 2.1 (8)    | $C^{(7A)} C^{(8A)} C^{(9A)} C^{(4A)}$     | 1.3 (8)    |
| $C^{(9)} C^{(4)} C^{(5)} C^{(6)}$     | 1.0 (9)    | $C^{(9A)} C^{(4A)} C^{(5A)} C^{(6A)}$     | 2.2 (8)    |
| $C^{(10)} C^{(3)} C^{(4)} C^{(5)}$    | 36.2 (7)   | $C^{(10A)} C^{(3A)} C^{(4A)} C^{(5A)}$    | 30.4 (7)   |
| $C^{(10)} C^{(3)} C^{(4)} C^{(9)}$    | -145.0 (5) | $C^{(10A)} C^{(3A)} C^{(4A)} C^{(9A)}$    | -149.0 (5) |
| $C^{(10)} C^{(11)} C^{(12)} C^{(13)}$ | 3.1 (8)    | $C^{(10A)} C^{(11A)} C^{(12A)} C^{(13A)}$ | -0.6 (7)   |
| $C^{(10)} C^{(11)} C^{(12)} C^{(17)}$ | -178.4 (5) | $C^{(10A)} C^{(11A)} C^{(12A)} C^{(17A)}$ | -178.9 (5) |
| $C^{(11)} N^{(1)} C^{(1)} C^{(2)}$    | 2.3 (8)    | $C^{(11A)} N^{(1A)} C^{(1A)} C^{(2A)}$    | 1.8 (8)    |
| $C^{(11)} N^{(1)} C^{(19)} C^{(18)}$  | 1.8 (8)    | $C^{(11A)} N^{(1A)} C^{(19A)} C^{(18A)}$  | 1.6 (7)    |
| $C^{(11)} N^{(1)} C^{(19)} C^{(20)}$  | -175.6 (5) | $C^{(11A)} N^{(1A)} C^{(19A)} C^{(20A)}$  | -175.5 (5) |
| $C^{(11)} C^{(12)} C^{(13)} C^{(14)}$ | 177.9 (5)  | $C^{(11A)} C^{(12A)} C^{(13A)} C^{(14A)}$ | 179.4 (5)  |
| $C^{(11)} C^{(12)} C^{(17)} C^{(16)}$ | -178.3 (5) | $C^{(11A)} C^{(12A)} C^{(17A)} C^{(16A)}$ | 179.8 (5)  |
| $C^{(11)} C^{(12)} C^{(17)} C^{(18)}$ | 2.3 (8)    | $C^{(11A)} C^{(12A)} C^{(17A)} C^{(18A)}$ | 0.8 (7)    |
| $C^{(12)} C^{(13)} C^{(14)} C^{(15)}$ | 0.1 (8)    | $C^{(12A)} C^{(13A)} C^{(14A)} C^{(15A)}$ | 2.0 (8)    |
| $C^{(12)} C^{(17)} C^{(18)} N^{(2)}$  | 175.5 (5)  | $C^{(12A)} C^{(17A)} C^{(18A)} N^{(2A)}$  | 177.5 (5)  |
| $C^{(12)} C^{(17)} C^{(18)} C^{(19)}$ | -3.5 (8)   | $C^{(12A)} C^{(17A)} C^{(18A)} C^{(19A)}$ | -1.5 (7)   |
| $C^{(13)} C^{(12)} C^{(17)} C^{(16)}$ | 0.2 (8)    | $C^{(13A)} C^{(12A)} C^{(17A)} C^{(16A)}$ | 1.5 (7)    |
| $C^{(13)} C^{(12)} C^{(17)} C^{(18)}$ | -179.2 (5) | $C^{(13A)} C^{(12A)} C^{(17A)} C^{(18A)}$ | -177.5 (4) |
| $C^{(13)} C^{(14)} C^{(15)} C^{(16)}$ | 0.9 (9)    | $C^{(13A)} C^{(14A)} C^{(15A)} C^{(16A)}$ | -0.9 (8)   |
| $C^{(14)} C^{(15)} C^{(16)} C^{(17)}$ | -1.3 (9)   | $C^{(14A)} C^{(15A)} C^{(16A)} C^{(17A)}$ | 0.2 (8)    |
| $C^{(15)} C^{(16)} C^{(17)} C^{(12)}$ | 0.7 (8)    | $C^{(15A)} C^{(16A)} C^{(17A)} C^{(12A)}$ | -0.5 (8)   |
| $C^{(15)} C^{(16)} C^{(17)} C^{(18)}$ | -179.9 (5) | $C^{(15A)} C^{(16A)} C^{(17A)} C^{(18A)}$ | 178.5 (5)  |
| $C^{(16)} C^{(17)} C^{(18)} N^{(2)}$  | -3.8 (9)   | $C^{(16A)} C^{(17A)} C^{(18A)} N^{(2A)}$  | -1.5 (8)   |

|                                                                         |            |                                                                             |            |
|-------------------------------------------------------------------------|------------|-----------------------------------------------------------------------------|------------|
| C <sup>(16)</sup> C <sup>(17)</sup> C <sup>(18)</sup> C <sup>(19)</sup> | 177.2 (5)  | C <sup>(16A)</sup> C <sup>(17A)</sup> C <sup>(18A)</sup> C <sup>(19A)</sup> | 179.6 (5)  |
| C <sup>(17)</sup> C <sup>(12)</sup> C <sup>(13)</sup> C <sup>(14)</sup> | -0.6 (8)   | C <sup>(17A)</sup> C <sup>(12A)</sup> C <sup>(13A)</sup> C <sup>(14A)</sup> | -2.2 (8)   |
| C <sup>(17)</sup> C <sup>(18)</sup> C <sup>(19)</sup> N <sup>(1)</sup>  | 1.5 (8)    | C <sup>(17A)</sup> C <sup>(18A)</sup> C <sup>(19A)</sup> N <sup>(1A)</sup>  | 0.3 (8)    |
| C <sup>(17)</sup> C <sup>(18)</sup> C <sup>(19)</sup> C <sup>(20)</sup> | 179.4 (5)  | C <sup>(17A)</sup> C <sup>(18A)</sup> C <sup>(19A)</sup> C <sup>(20A)</sup> | 178.0 (5)  |
| C <sup>(18)</sup> N <sup>(2)</sup> C <sup>(21)</sup> C <sup>(20)</sup>  | -0.1 (6)   | C <sup>(18A)</sup> N <sup>(2A)</sup> C <sup>(21A)</sup> C <sup>(20A)</sup>  | -0.3 (6)   |
| C <sup>(18)</sup> N <sup>(2)</sup> C <sup>(21)</sup> C <sup>(22)</sup>  | -179.7 (5) | C <sup>(18A)</sup> N <sup>(2A)</sup> C <sup>(21A)</sup> C <sup>(22A)</sup>  | -179.1 (5) |
| C <sup>(18)</sup> C <sup>(19)</sup> C <sup>(20)</sup> C <sup>(21)</sup> | -0.3 (6)   | C <sup>(18A)</sup> C <sup>(19A)</sup> C <sup>(20A)</sup> C <sup>(21A)</sup> | 0.9 (6)    |
| C <sup>(19)</sup> N <sup>(1)</sup> C <sup>(1)</sup> C <sup>(2)</sup>    | -178.3 (5) | C <sup>(19A)</sup> N <sup>(1A)</sup> C <sup>(1A)</sup> C <sup>(2A)</sup>    | -178.1 (5) |
| C <sup>(19)</sup> N <sup>(1)</sup> C <sup>(11)</sup> C <sup>(10)</sup>  | 176.4 (5)  | C <sup>(19A)</sup> N <sup>(1A)</sup> C <sup>(11A)</sup> C <sup>(10A)</sup>  | 177.7 (5)  |
| C <sup>(19)</sup> N <sup>(1)</sup> C <sup>(11)</sup> C <sup>(12)</sup>  | -2.9 (7)   | C <sup>(19A)</sup> N <sup>(1A)</sup> C <sup>(11A)</sup> C <sup>(12A)</sup>  | -2.3 (7)   |
| C <sup>(19)</sup> C <sup>(20)</sup> C <sup>(21)</sup> N <sup>(2)</sup>  | 0.2 (6)    | C <sup>(19A)</sup> C <sup>(20A)</sup> C <sup>(21A)</sup> N <sup>(2A)</sup>  | -0.4 (6)   |
| C <sup>(19)</sup> C <sup>(20)</sup> C <sup>(21)</sup> C <sup>(22)</sup> | 179.8 (5)  | C <sup>(19A)</sup> C <sup>(20A)</sup> C <sup>(21A)</sup> C <sup>(22A)</sup> | 178.4 (5)  |
| C <sup>(20)</sup> C <sup>(21)</sup> C <sup>(22)</sup> C <sup>(23)</sup> | 164.2 (5)  | C <sup>(20A)</sup> C <sup>(21A)</sup> C <sup>(22A)</sup> C <sup>(23A)</sup> | 162.5 (5)  |
| C <sup>(20)</sup> C <sup>(21)</sup> C <sup>(22)</sup> C <sup>(27)</sup> | -16.2 (9)  | C <sup>(20A)</sup> C <sup>(21A)</sup> C <sup>(22A)</sup> C <sup>(27A)</sup> | -17.6 (8)  |
| C <sup>(21)</sup> N <sup>(2)</sup> C <sup>(18)</sup> C <sup>(17)</sup>  | -179.2 (5) | C <sup>(21A)</sup> N <sup>(2A)</sup> C <sup>(18A)</sup> C <sup>(17A)</sup>  | -178.2 (5) |
| C <sup>(21)</sup> N <sup>(2)</sup> C <sup>(18)</sup> C <sup>(19)</sup>  | -0.1 (6)   | C <sup>(21A)</sup> N <sup>(2A)</sup> C <sup>(18A)</sup> C <sup>(19A)</sup>  | 0.8 (6)    |
| C <sup>(21)</sup> C <sup>(22)</sup> C <sup>(23)</sup> C <sup>(24)</sup> | 179.0 (5)  | C <sup>(21A)</sup> C <sup>(22A)</sup> C <sup>(23A)</sup> C <sup>(24A)</sup> | 177.9 (5)  |
| C <sup>(21)</sup> C <sup>(22)</sup> C <sup>(27)</sup> C <sup>(26)</sup> | -178.4 (5) | C <sup>(21A)</sup> C <sup>(22A)</sup> C <sup>(27A)</sup> C <sup>(26A)</sup> | -178.3 (5) |
| C <sup>(22)</sup> C <sup>(23)</sup> C <sup>(24)</sup> C <sup>(25)</sup> | -0.2 (8)   | C <sup>(22A)</sup> C <sup>(23A)</sup> C <sup>(24A)</sup> C <sup>(25A)</sup> | 2.2 (8)    |
| C <sup>(23)</sup> C <sup>(22)</sup> C <sup>(27)</sup> C <sup>(26)</sup> | 1.1 (8)    | C <sup>(23A)</sup> C <sup>(22A)</sup> C <sup>(27A)</sup> C <sup>(26A)</sup> | 1.6 (8)    |
| C <sup>(23)</sup> C <sup>(24)</sup> C <sup>(25)</sup> C <sup>(26)</sup> | 0.3 (8)    | C <sup>(23A)</sup> C <sup>(24A)</sup> C <sup>(25A)</sup> C <sup>(26A)</sup> | -2.0 (8)   |
| C <sup>(24)</sup> C <sup>(25)</sup> C <sup>(26)</sup> C <sup>(27)</sup> | 0.4 (9)    | C <sup>(24A)</sup> C <sup>(25A)</sup> C <sup>(26A)</sup> C <sup>(27A)</sup> | 1.7 (8)    |
| C <sup>(25)</sup> C <sup>(26)</sup> C <sup>(27)</sup> C <sup>(22)</sup> | -1.1 (8)   | C <sup>(25A)</sup> C <sup>(26A)</sup> C <sup>(27A)</sup> C <sup>(22A)</sup> | -1.5 (8)   |
| C <sup>(27)</sup> C <sup>(22)</sup> C <sup>(23)</sup> C <sup>(24)</sup> | -0.5 (8)   | C <sup>(27A)</sup> C <sup>(22A)</sup> C <sup>(23A)</sup> C <sup>(24A)</sup> | -2.0 (8)   |

**Table S29 Hydrogen Atom Coordinates ( $\text{\AA}\times 10^4$ ) and Isotropic Displacement Parameters ( $\text{\AA}^2\times 10^3$ ) for 13.**

| Atom              | x    | y    | z     | U(eq) |
|-------------------|------|------|-------|-------|
| H <sup>(1)</sup>  | 3360 | 4730 | 8201  | 36    |
| H <sup>(2)</sup>  | 2850 | 4388 | 8924  | 33    |
| H <sup>(5)</sup>  | 1564 | 85   | 8991  | 44    |
| H <sup>(6)</sup>  | 1104 | -474 | 9736  | 54    |
| H <sup>(7)</sup>  | 963  | 1468 | 10298 | 50    |
| H <sup>(8)</sup>  | 1324 | 3958 | 10138 | 40    |
| H <sup>(9)</sup>  | 1835 | 4508 | 9418  | 36    |
| H <sup>(10)</sup> | 1290 | 1249 | 8212  | 32    |
| H <sup>(13)</sup> | 750  | 229  | 7548  | 34    |
| H <sup>(14)</sup> | 172  | -932 | 6802  | 38    |
| H <sup>(15)</sup> | 687  | -474 | 6068  | 39    |
| H <sup>(16)</sup> | 1798 | 1087 | 6092  | 35    |
| H <sup>(20)</sup> | 3975 | 4944 | 7486  | 36    |
| H <sup>(23)</sup> | 4070 | 3104 | 5896  | 41    |
| H <sup>(24)</sup> | 5001 | 4106 | 5437  | 45    |
| H <sup>(25)</sup> | 5765 | 6266 | 5736  | 50    |
| H <sup>(26)</sup> | 5600 | 7391 | 6487  | 49    |

|                    |      |       |      |    |
|--------------------|------|-------|------|----|
| H <sup>(27)</sup>  | 4694 | 6377  | 6954 | 41 |
| H <sup>(1A)</sup>  | 1651 | 3928  | 1757 | 33 |
| H <sup>(2A)</sup>  | 2137 | 3589  | 1030 | 36 |
| H <sup>(5A)</sup>  | 3598 | -560  | 1012 | 45 |
| H <sup>(6A)</sup>  | 4166 | -1072 | 307  | 47 |
| H <sup>(7A)</sup>  | 4152 | 802   | -308 | 51 |
| H <sup>(8A)</sup>  | 3659 | 3217  | -192 | 46 |
| H <sup>(9A)</sup>  | 3108 | 3744  | 522  | 38 |
| H <sup>(10A)</sup> | 3758 | 564   | 1761 | 32 |
| H <sup>(13A)</sup> | 4249 | -555  | 2411 | 33 |
| H <sup>(14A)</sup> | 4818 | -1737 | 3157 | 36 |
| H <sup>(15A)</sup> | 4280 | -1343 | 3888 | 34 |
| H <sup>(16A)</sup> | 3200 | 311   | 3866 | 33 |
| H <sup>(20A)</sup> | 1031 | 4159  | 2467 | 33 |
| H <sup>(23A)</sup> | 899  | 2414  | 4064 | 38 |
| H <sup>(24A)</sup> | 14   | 3521  | 4520 | 44 |
| H <sup>(25A)</sup> | -752 | 5665  | 4203 | 42 |
| H <sup>(26A)</sup> | -539 | 6761  | 3455 | 42 |
| H <sup>(27A)</sup> | 358  | 5671  | 2999 | 37 |
| H <sup>(1B)</sup>  | 2297 | 2920  | 5275 | 68 |
| H <sup>(1C)</sup>  | 2469 | 3456  | 5770 | 68 |
| H <sup>(1AA)</sup> | 2607 | 2599  | 4204 | 71 |
| H <sup>(1AB)</sup> | 2892 | 3597  | 4601 | 71 |

1-(2-(2-Bromophenyl)-4-phenyl-1*H*-pyrrol-3-yl)pyridin-1-ium bromide (**3a**), DMSO-*d*<sub>6</sub>

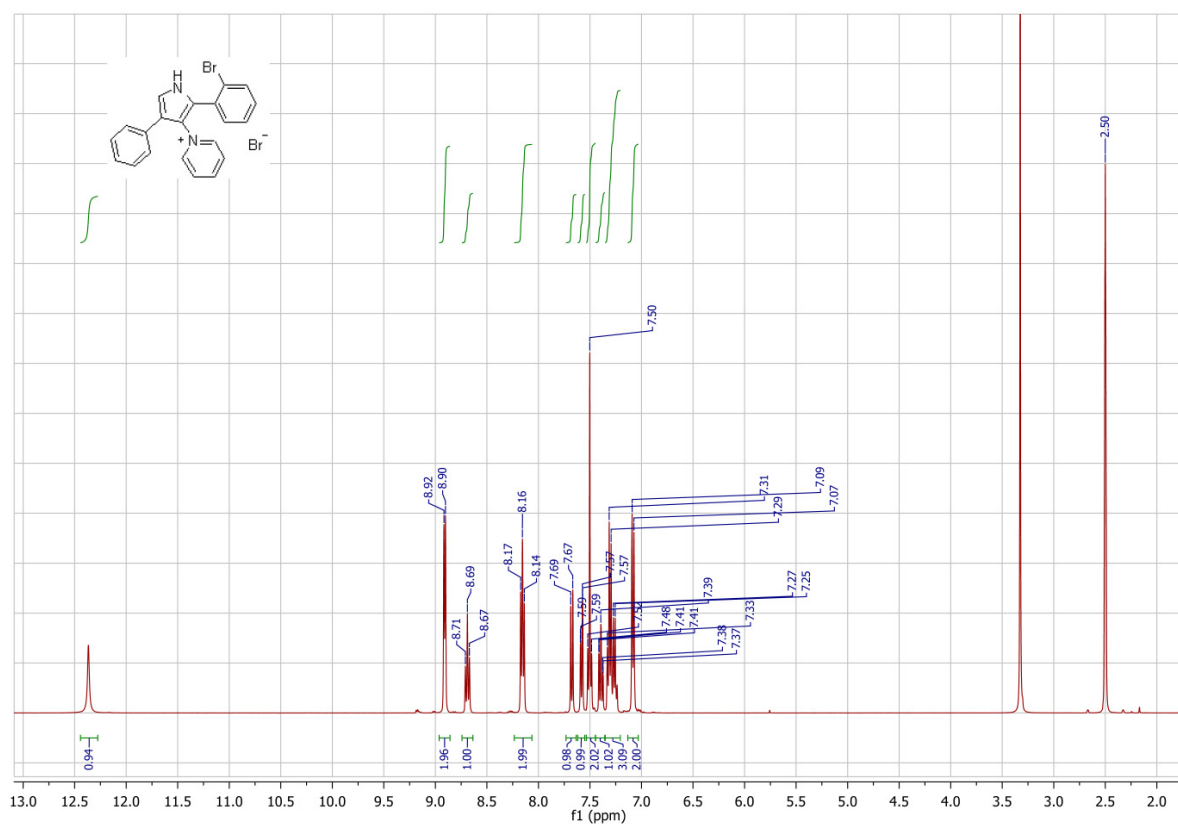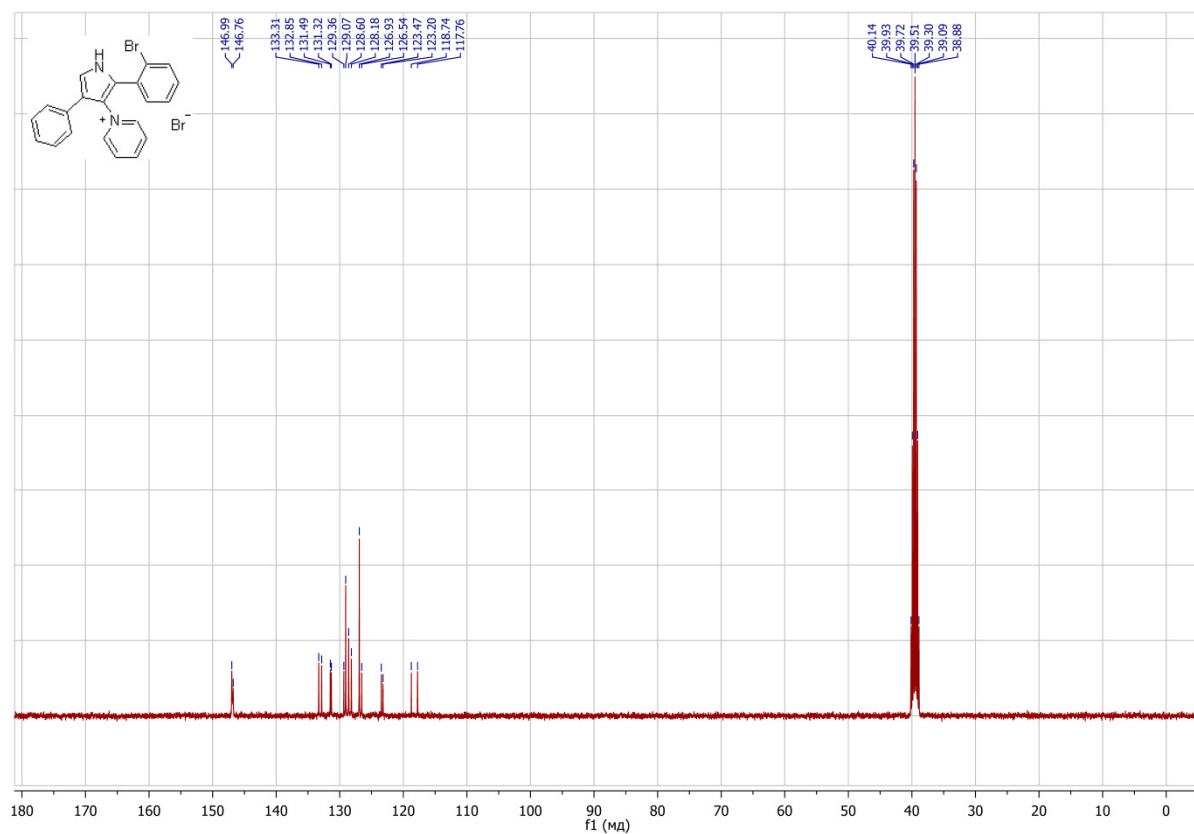

1-(4-(2-Bromophenyl)-2-phenyl-1*H*-pyrrol-3-yl)pyridin-1-ium bromide (**3b**), DMSO-*d*<sub>6</sub>

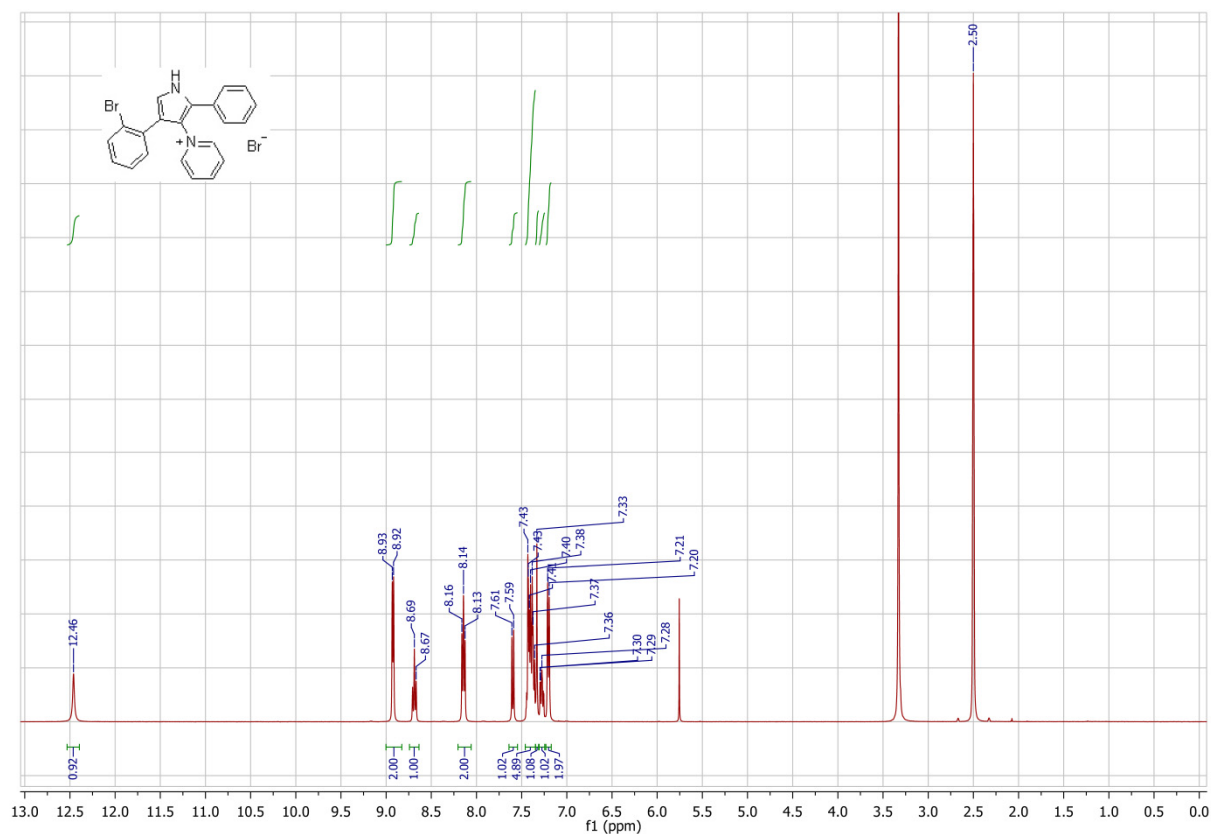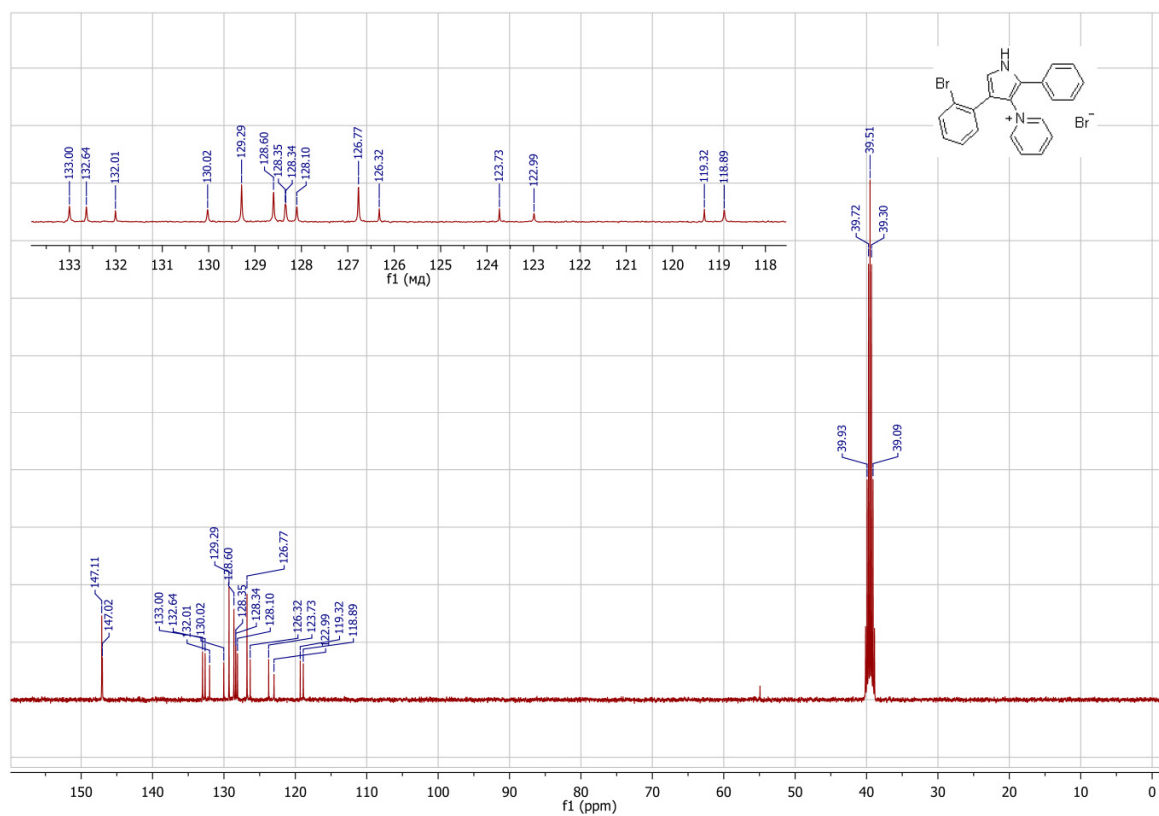



1-(2-(2-Bromophenyl)-4,5-diphenyl-1H-pyrrol-3-yl)pyridin-1-ium bromide (**3c**), DMSO-d<sub>6</sub>

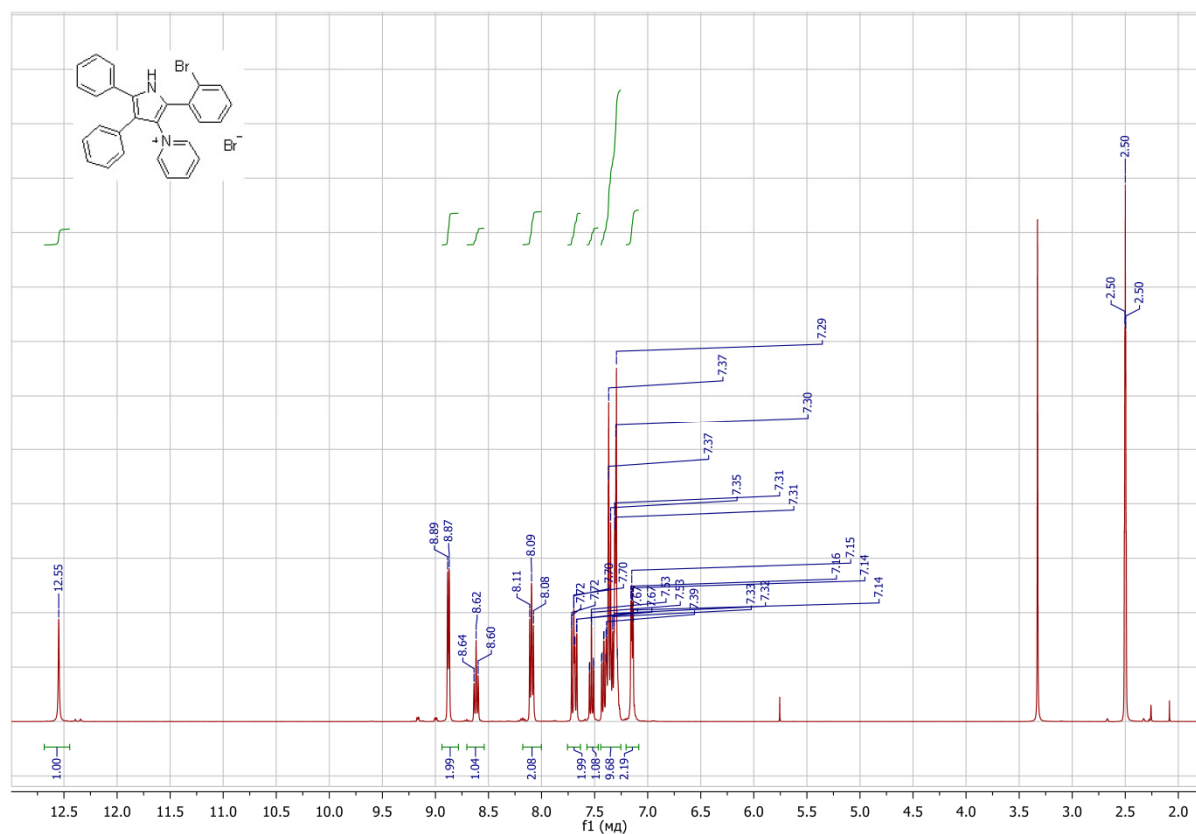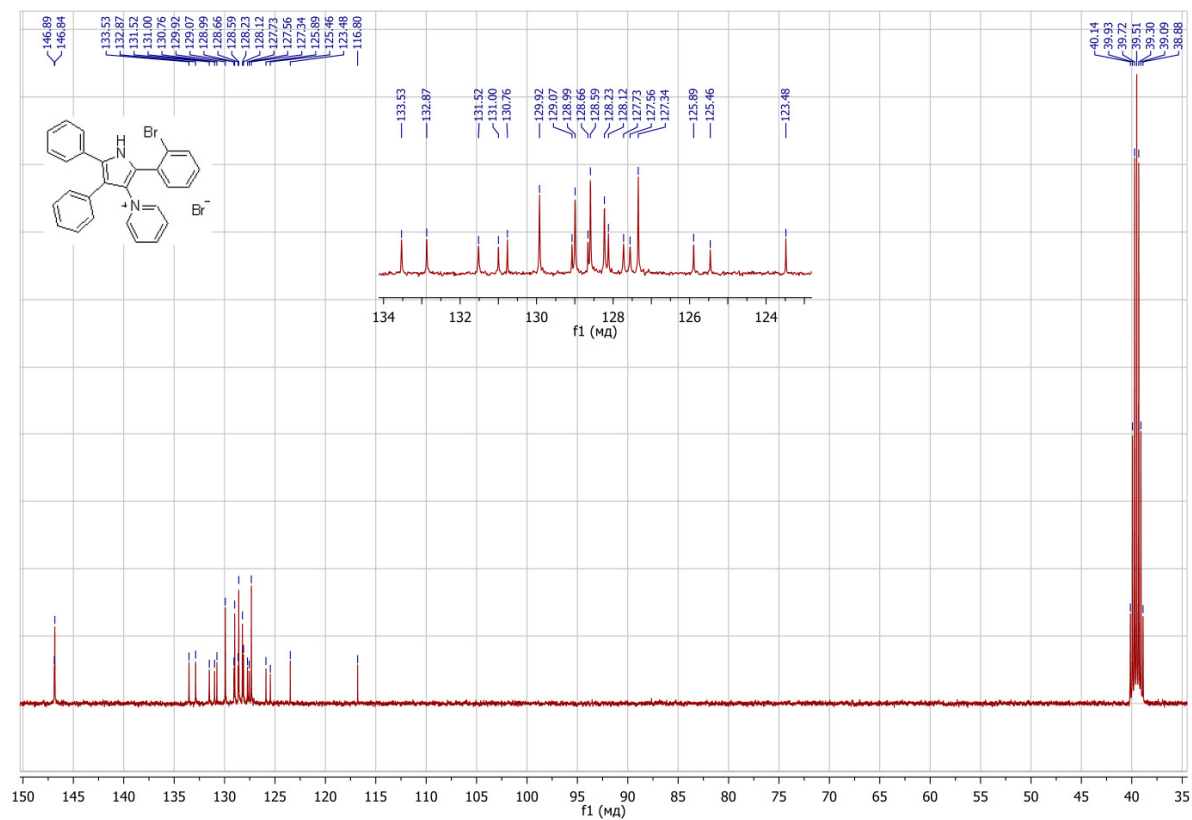

1-(2-(2-Bromophenyl)-4-phenyl-1H-pyrrol-3-yl)-4-phenylpyridin-1-ium bromide (**3d**), DMSO-d<sub>6</sub>

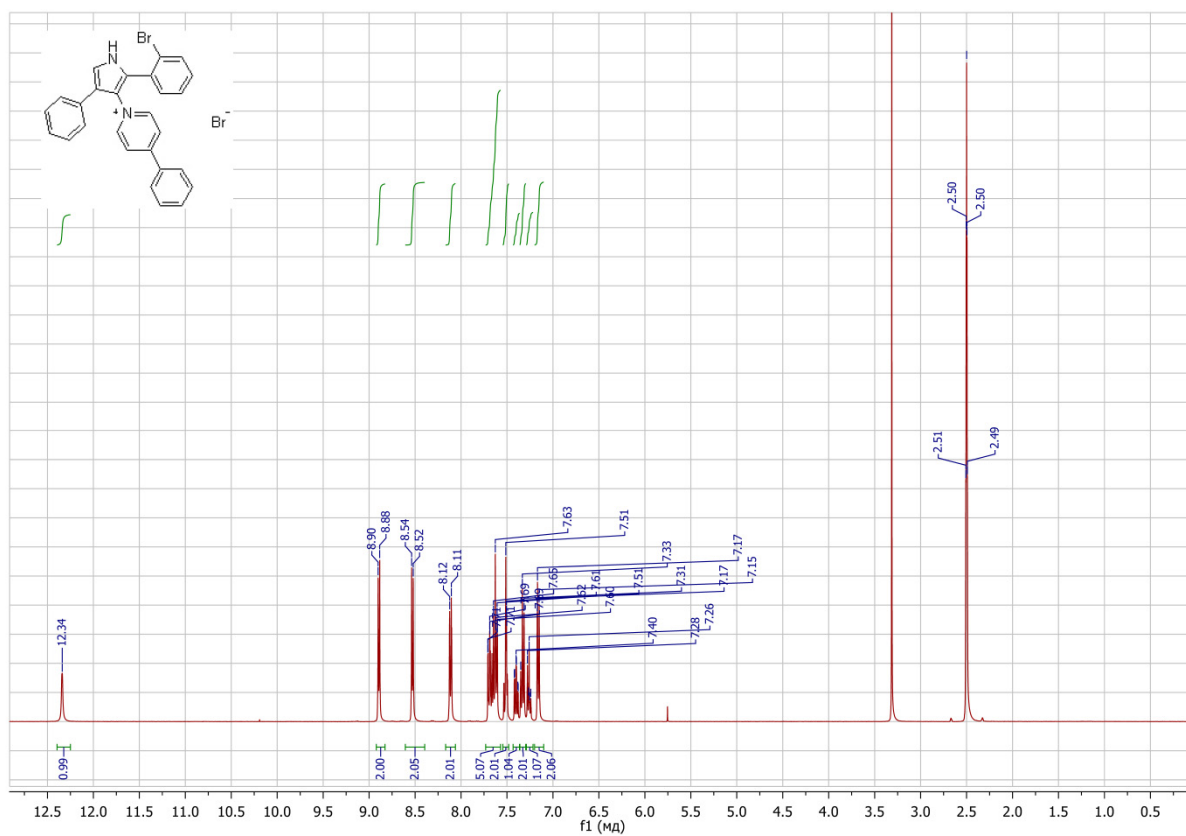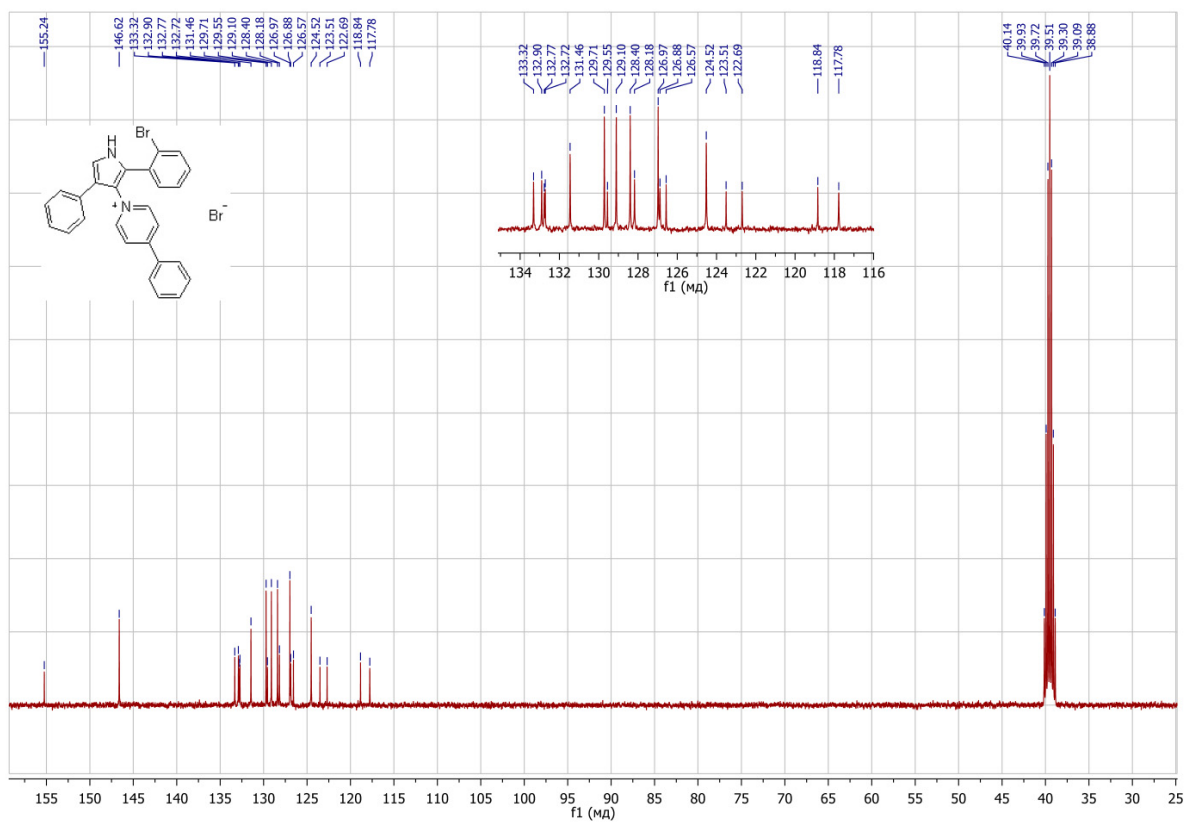

2-(2-Bromophenyl)-4-phenyl-3-(pyridin-1-ium-1-yl)pyrrol-1-ide (**4a**), DMSO-d<sub>6</sub>

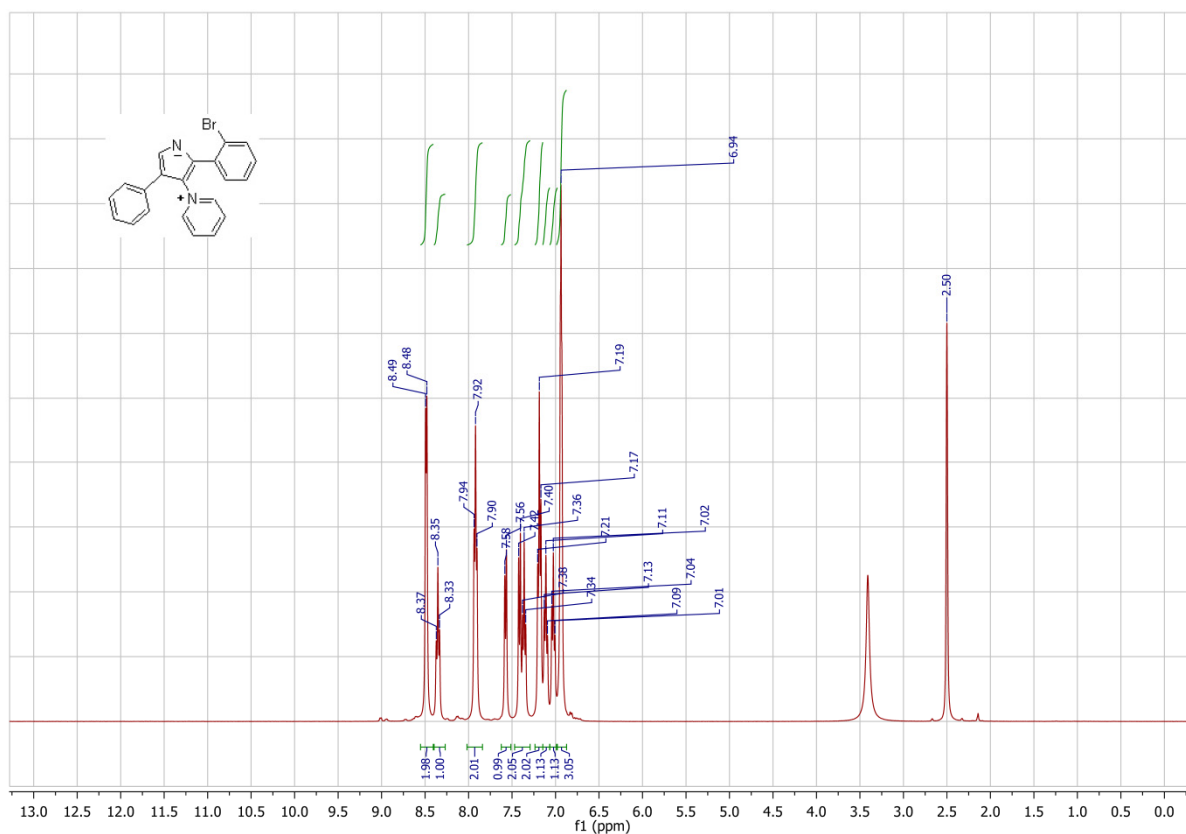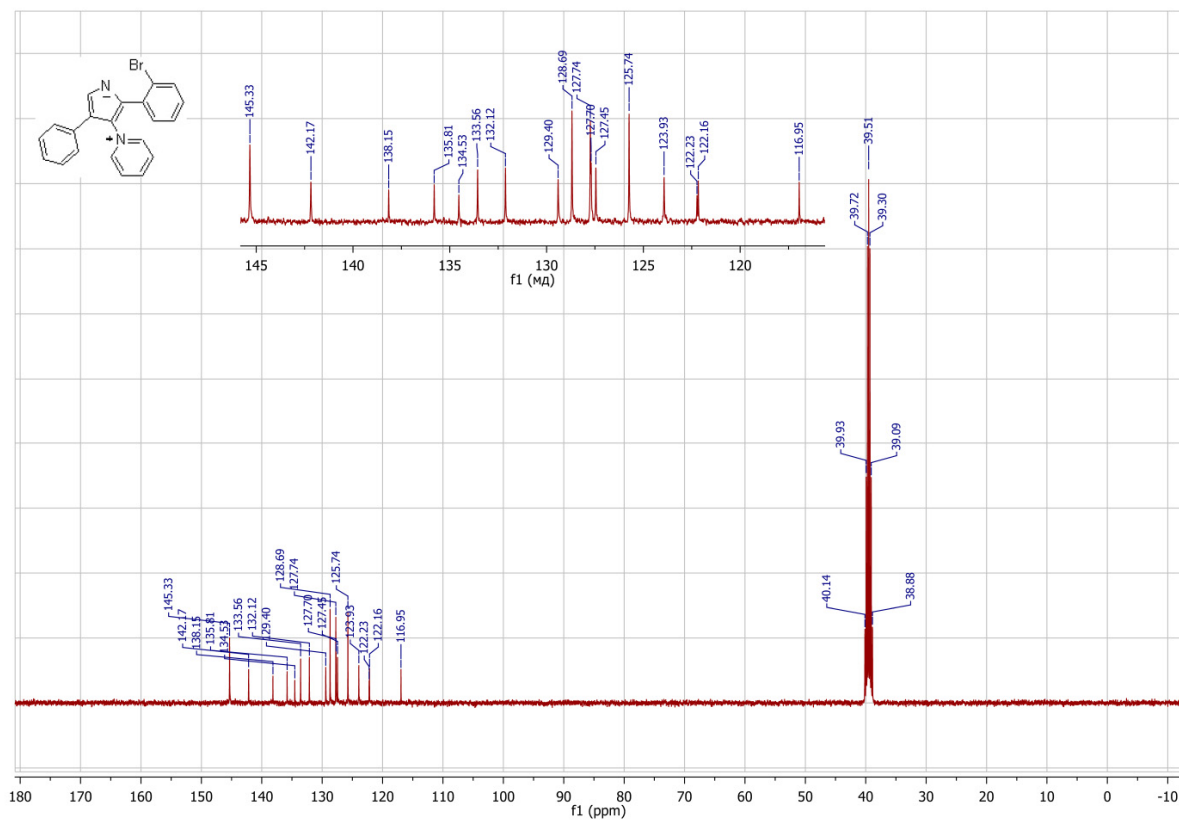

4-(2-Bromophenyl)-2-phenyl-3-(pyridin-1-ium-1-yl)pyrrol-1-ide (**4b**), DMSO-d<sub>6</sub>

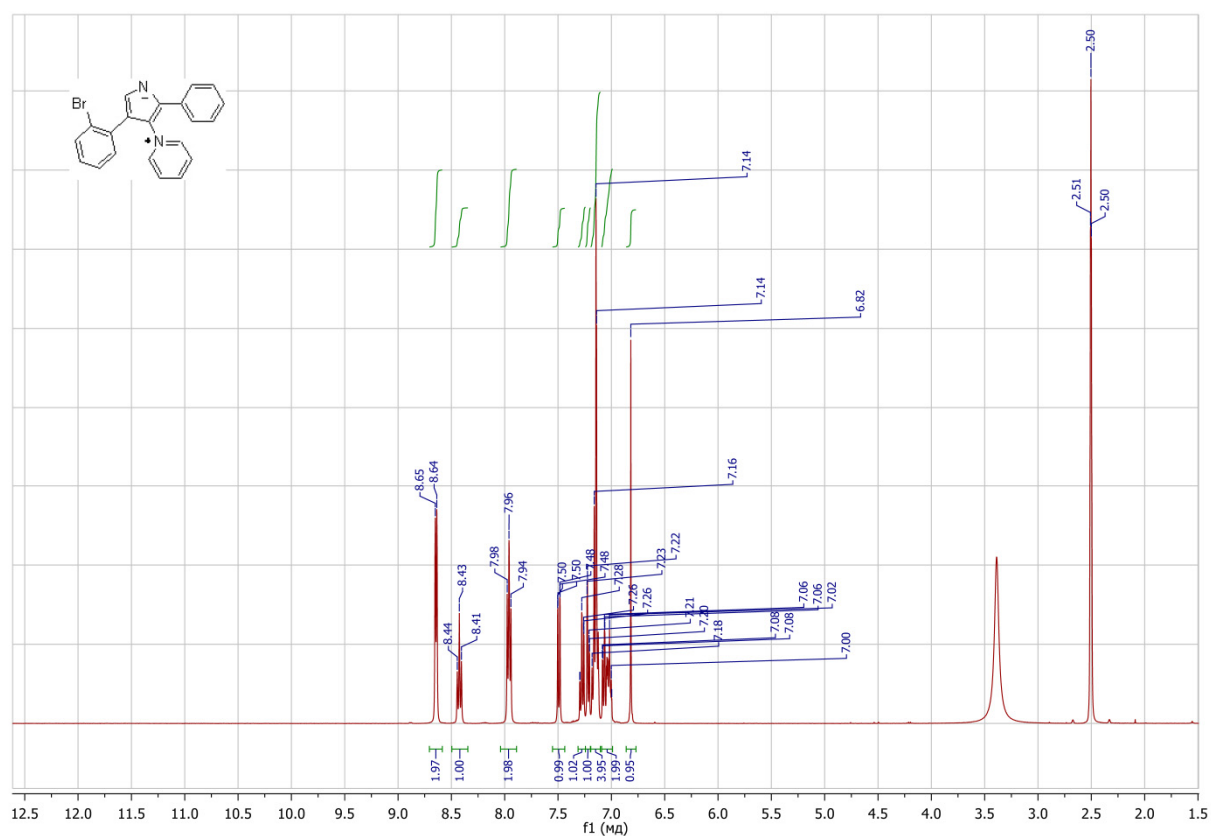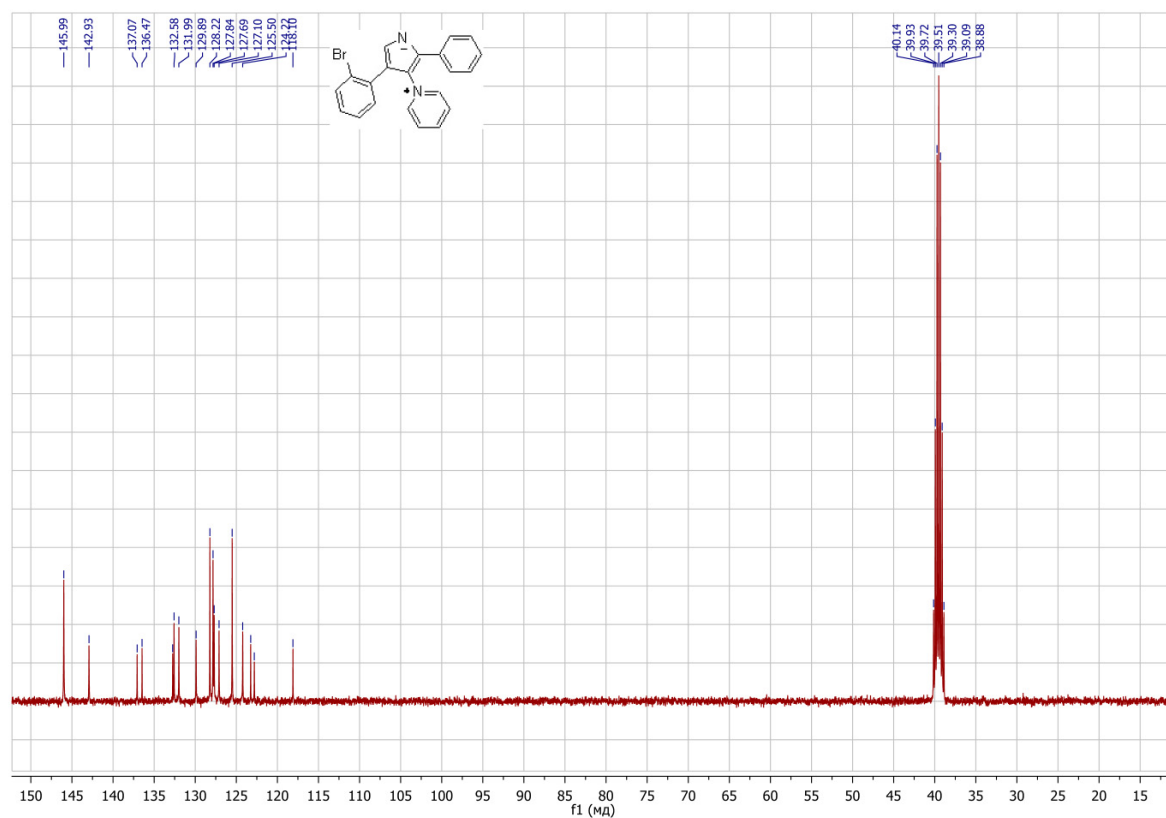

2-(2-Bromophenyl)-4,5-diphenyl-3-(pyridin-1-ium-1-yl)pyrrol-1-ide (**4c**), DMSO-d<sub>6</sub>

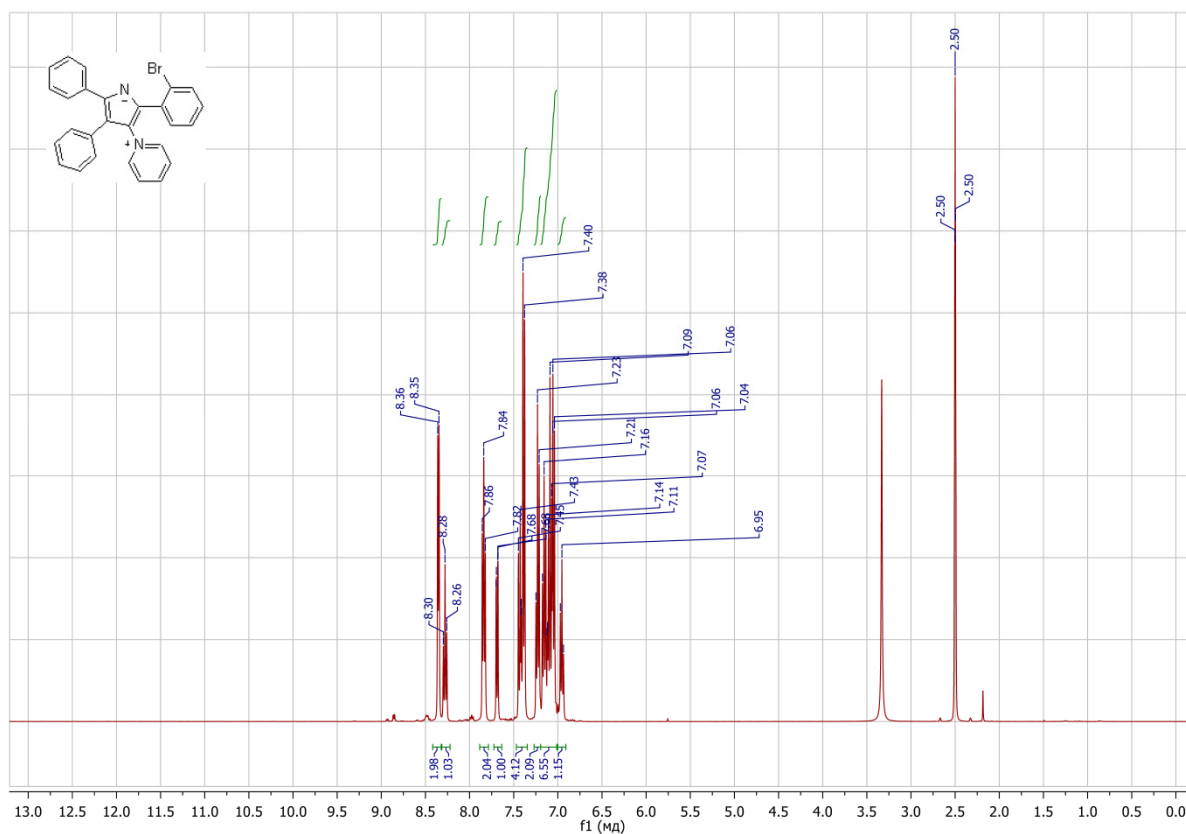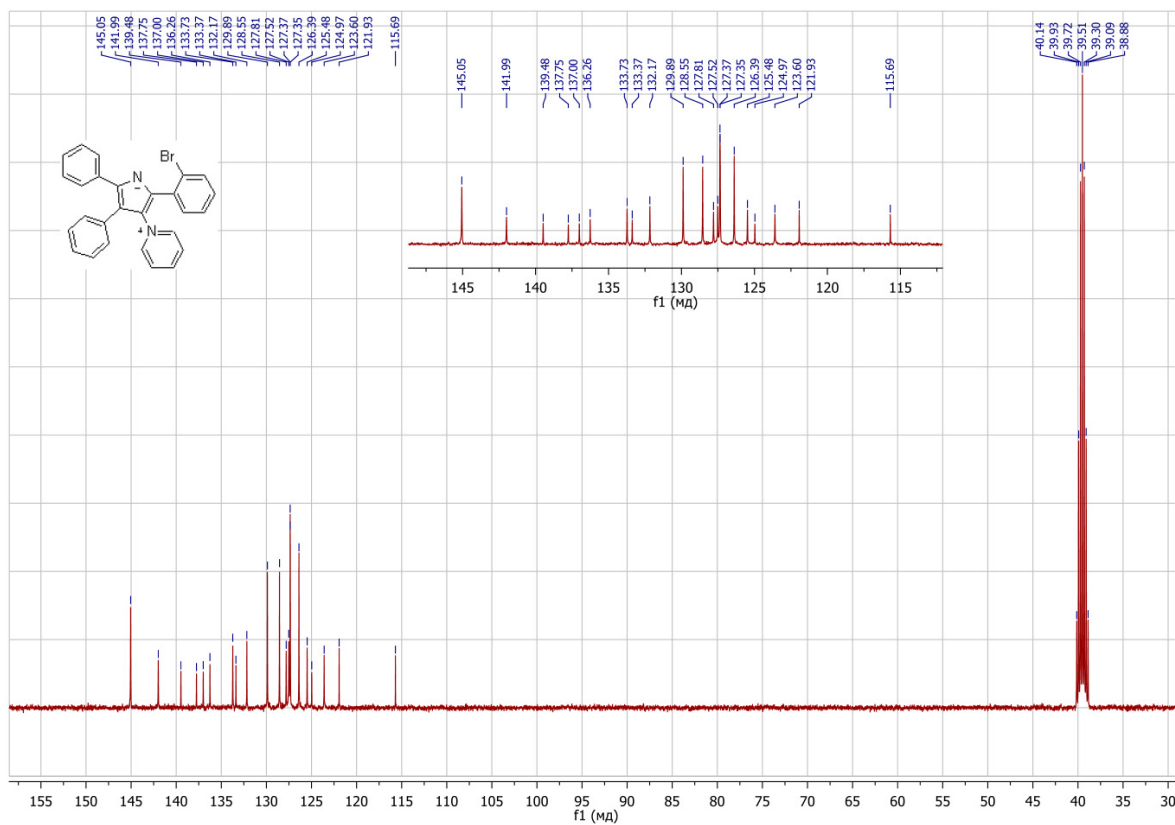

2-(2-Bromophenyl)-4-phenyl-3-(4-phenylpyridin-1-ium-1-yl)pyrrol-1-ide (**4d**), DMSO-d<sub>6</sub>

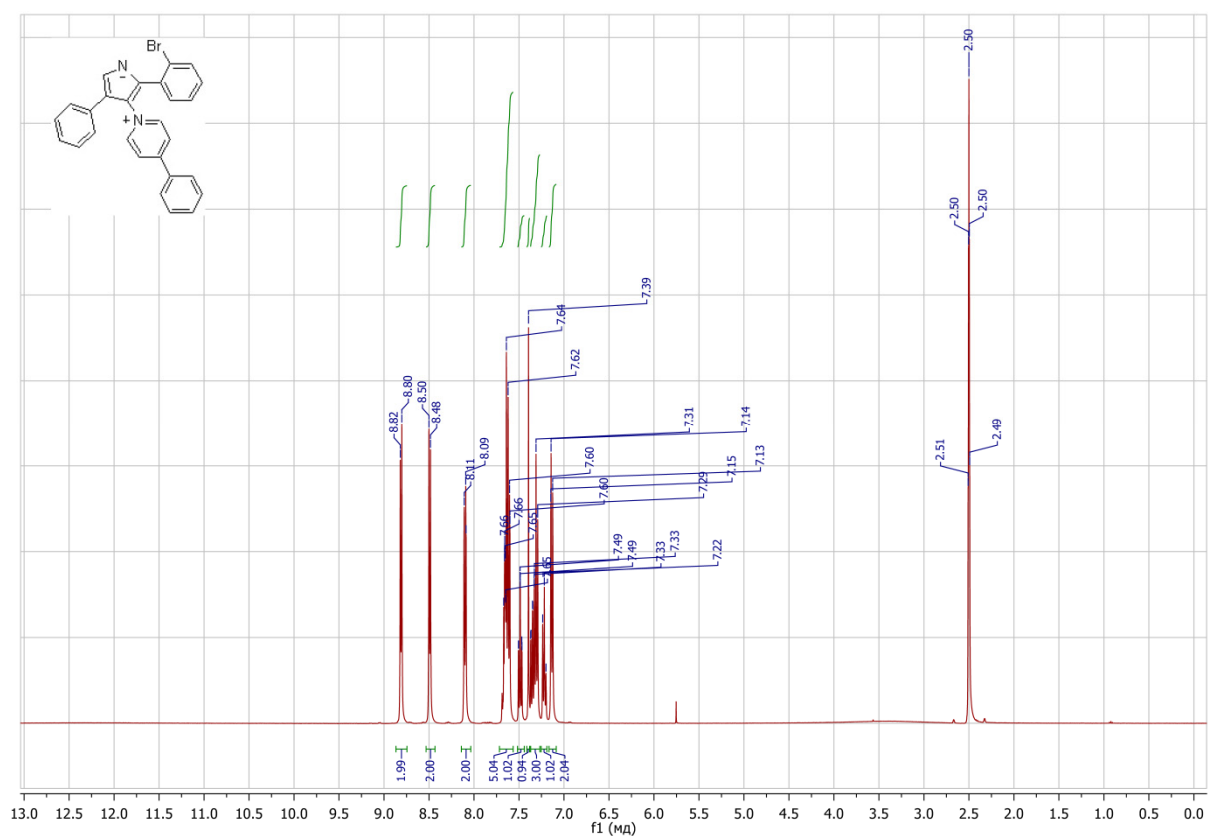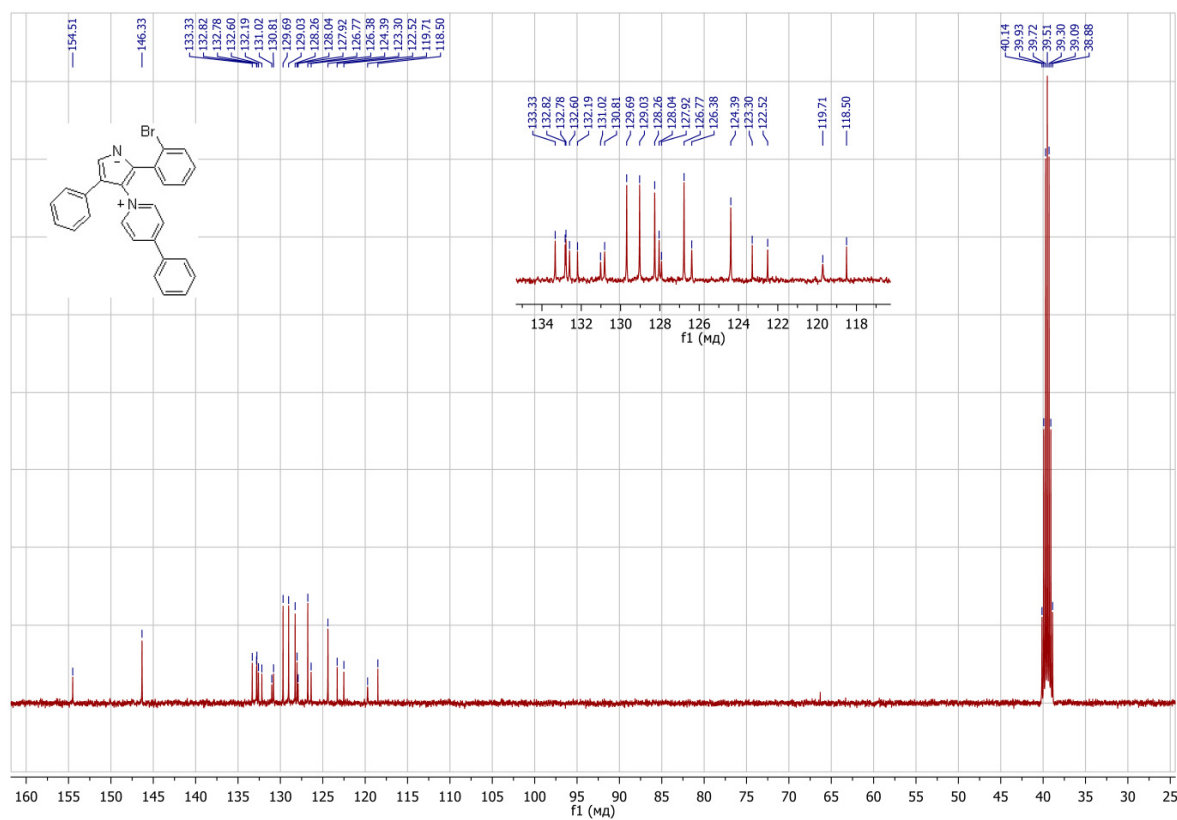

1-(2-(2-Bromophenyl)-1-methyl-4-phenyl-1*H*-pyrrol-3-yl)pyridin-1-ium iodide (**5a**), DMSO-d<sub>6</sub>

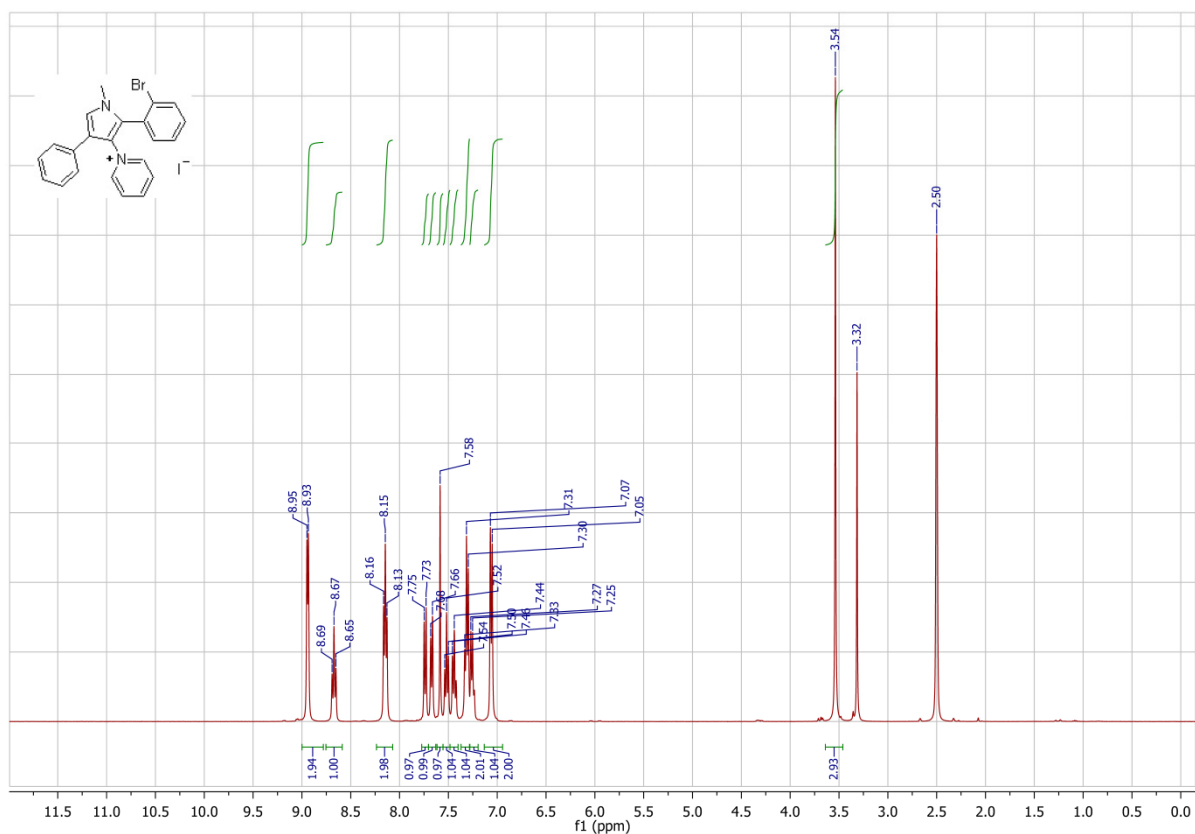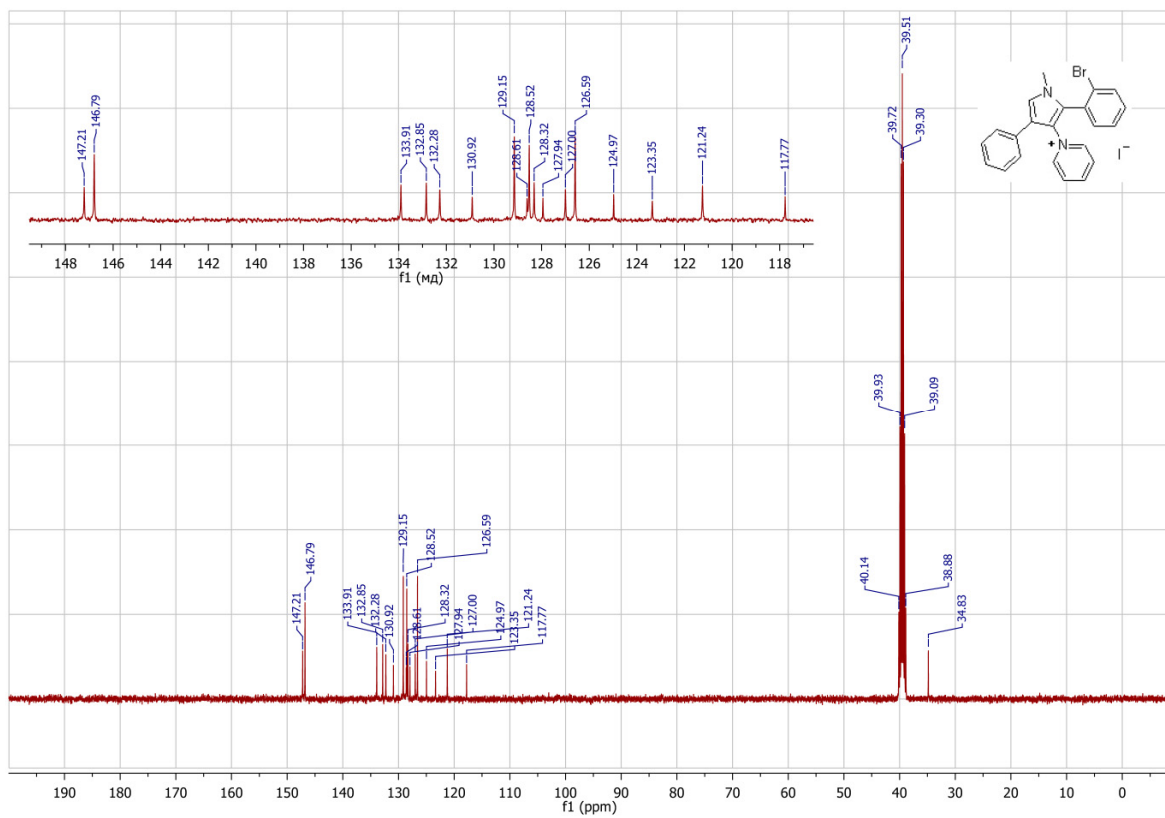

1-(4-(2-Bromophenyl)-1-methyl-2-phenyl-1H-pyrrol-3-yl)pyridin-1-ium iodide (**5b**),

$^1\text{H}$  NMR ( $\text{CDCl}_3$ ),  $^{13}\text{C}$  NMR ( $\text{DMSO-d}_6$ )

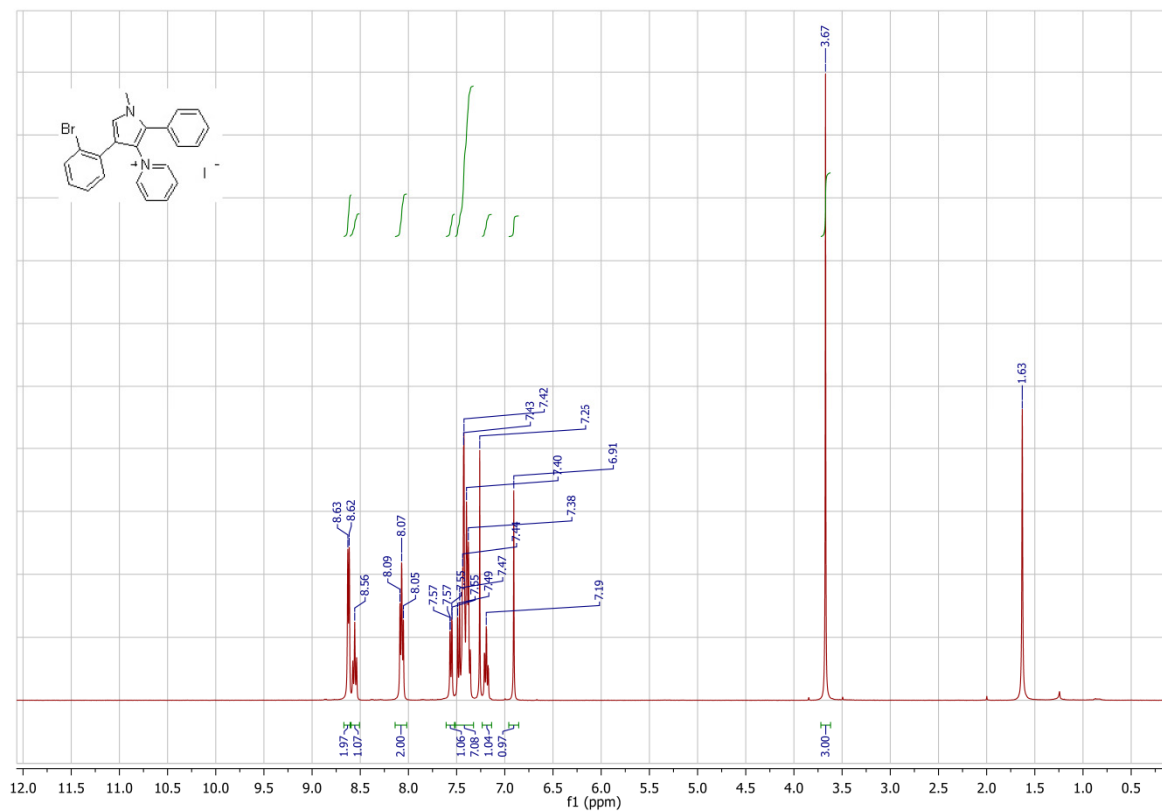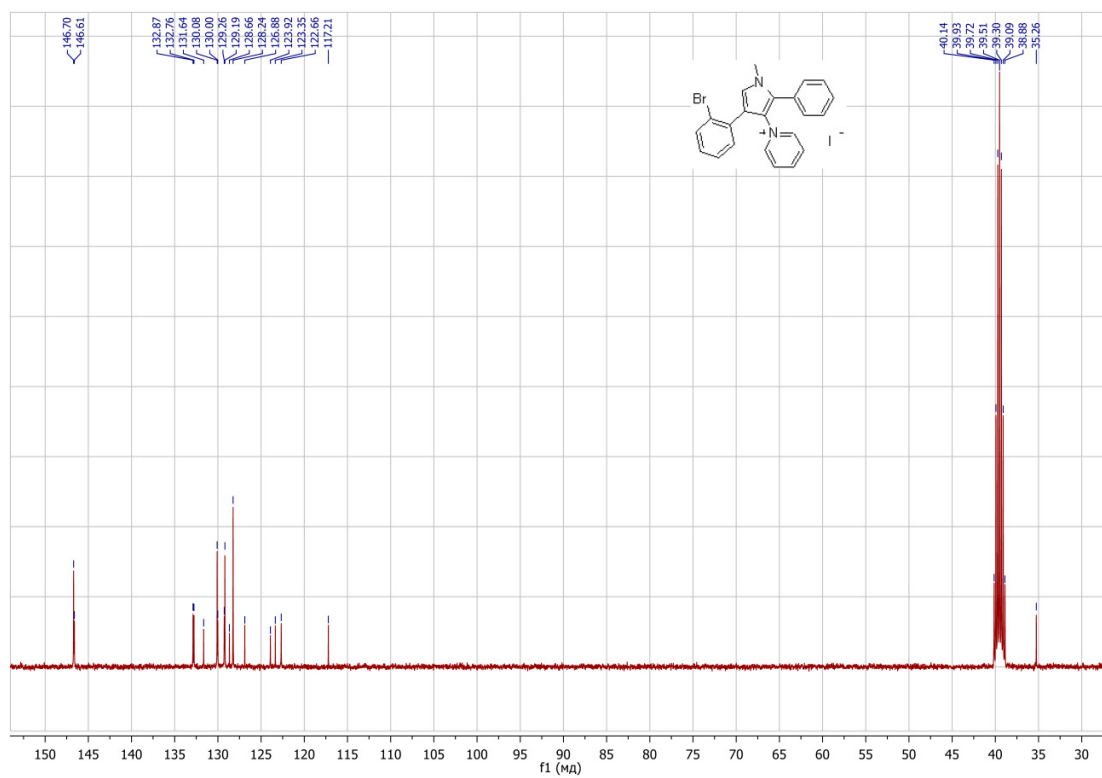



1-(1-Acetyl-2-(2-bromophenyl)-4-phenyl-1*H*-pyrrol-3-yl)pyridin-1-ium chloride (**6**), CDCl<sub>3</sub>

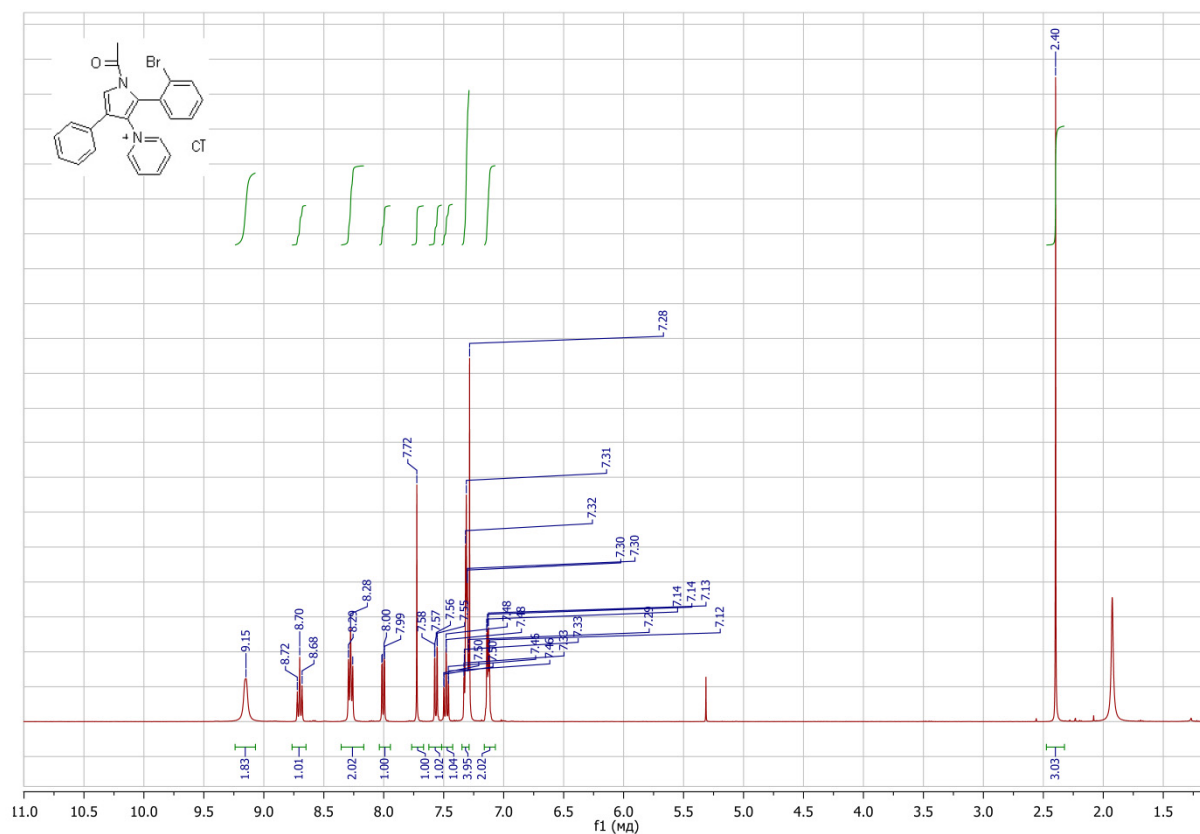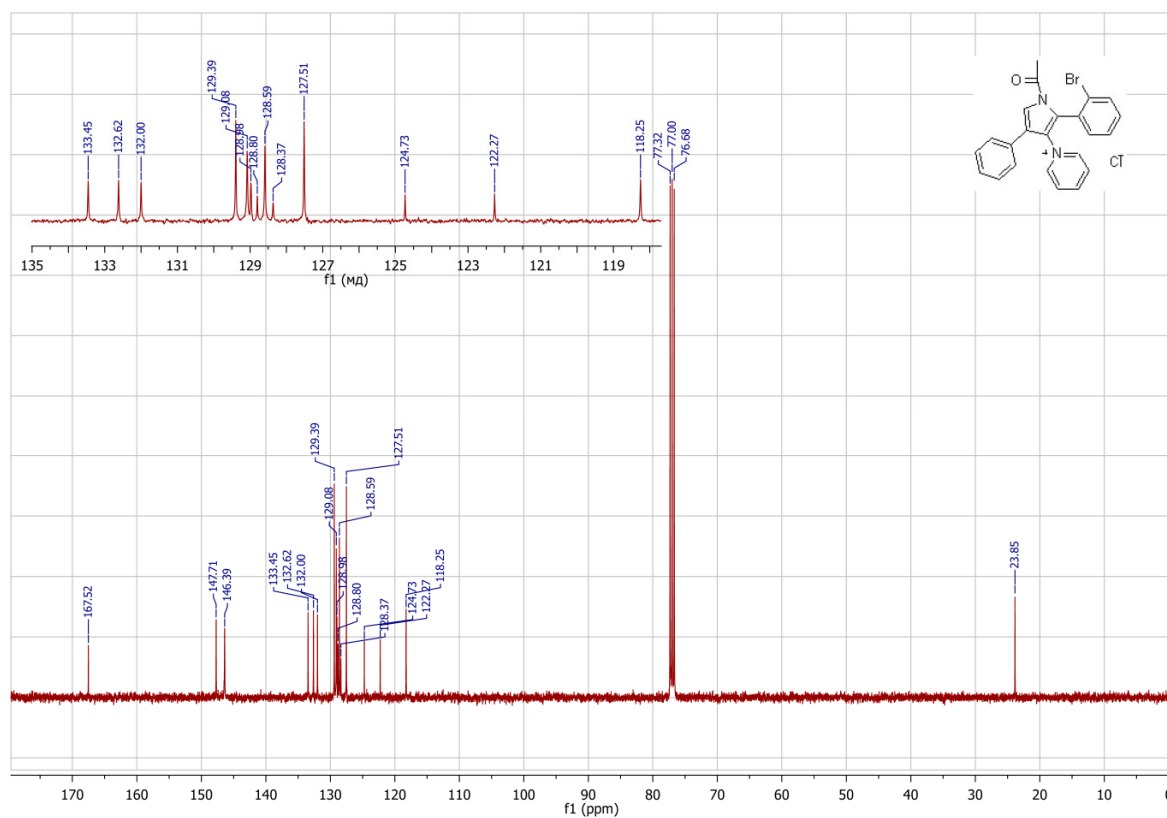

1-(1-Benzyl-2-(2-bromophenyl)-4-phenyl-1*H*-pyrrol-3-yl)pyridin-1-ium bromide (**7a**), DMSO-*d*<sub>6</sub>

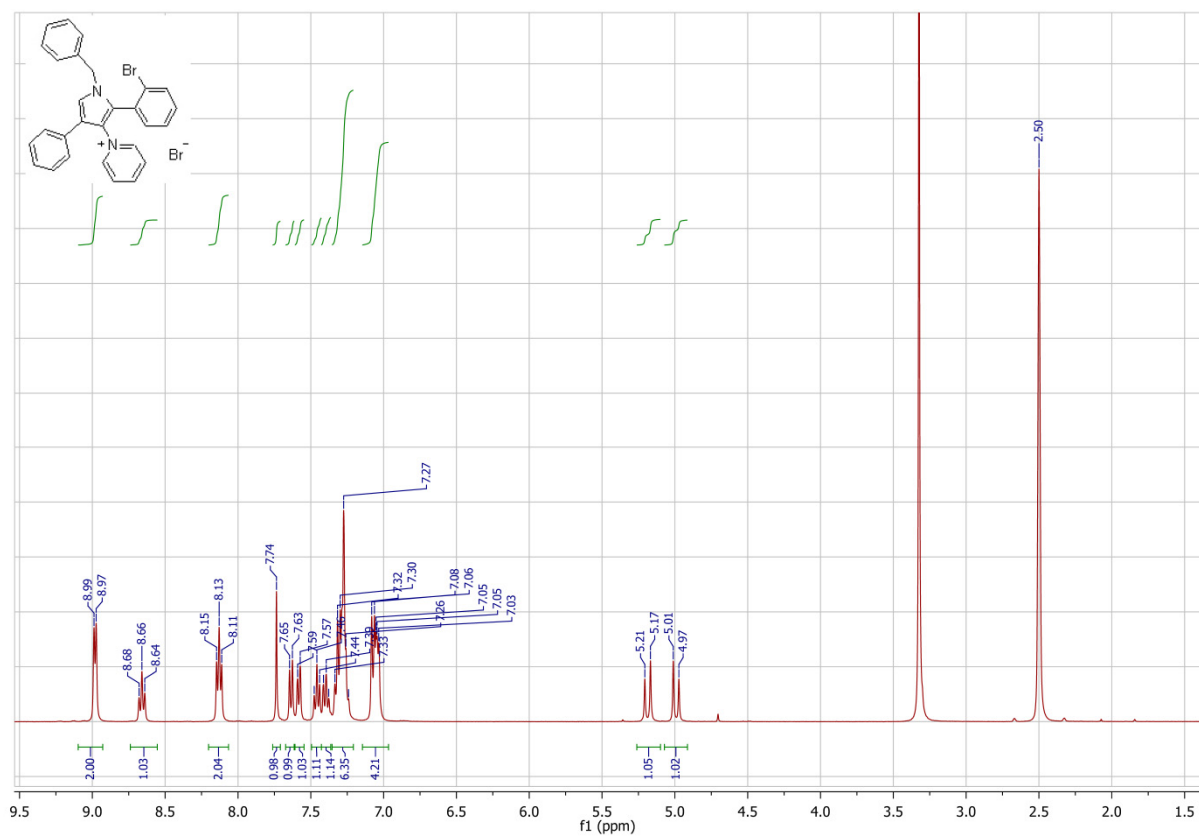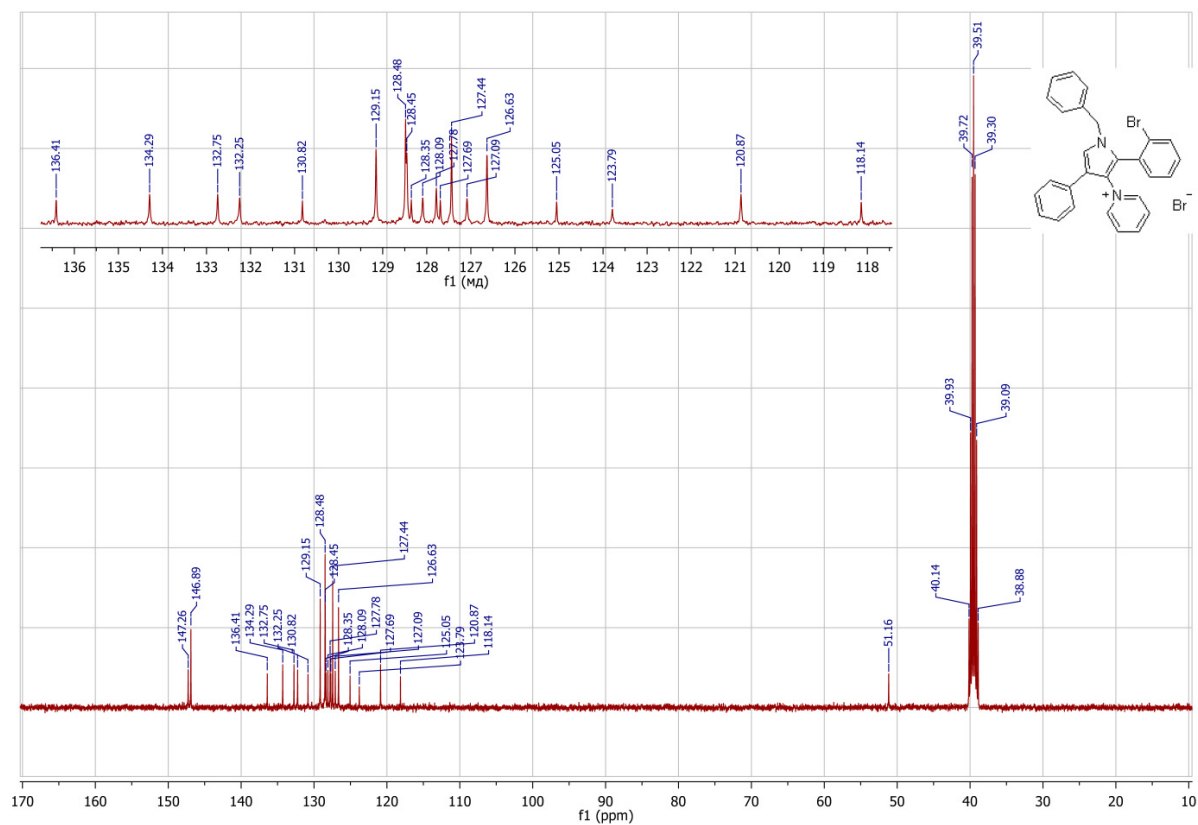

1-(1-Benzyl-2-(2-bromophenyl)-4,5-diphenyl-1*H*-pyrrol-3-yl)pyridin-1-ium bromide (**7b**), DMSO-*d*<sub>6</sub>

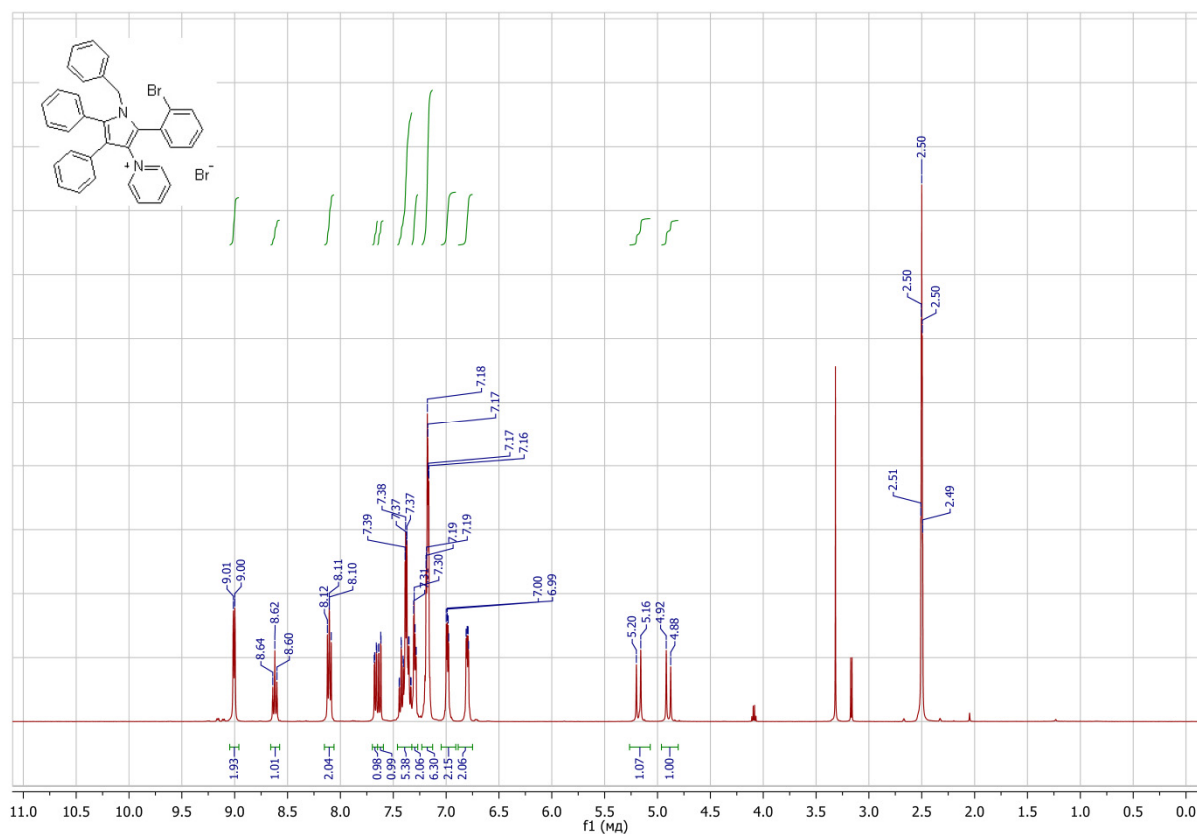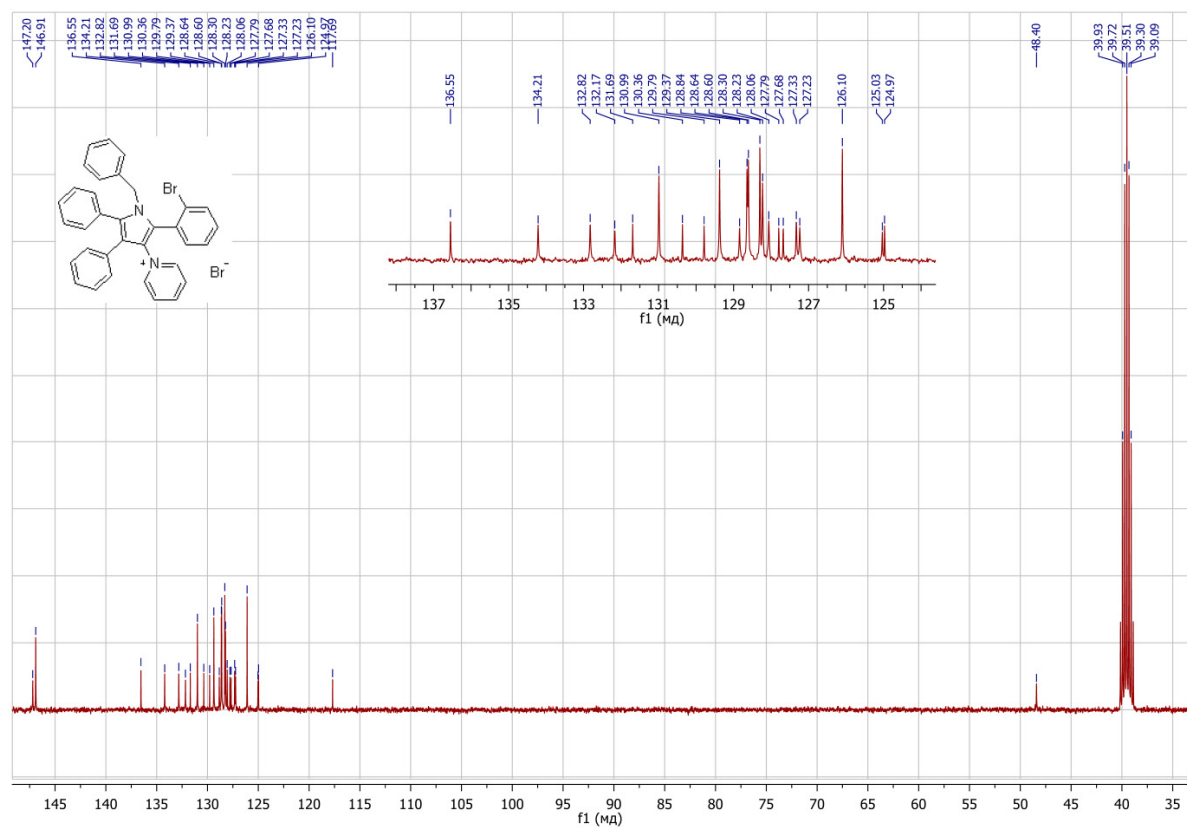

1-(1-Benzyl-2-(2-bromophenyl)-4-phenyl-1*H*-pyrrol-3-yl)-4-phenylpyridin-1-ium bromide (**7c**), DMSO-*d*<sub>6</sub>

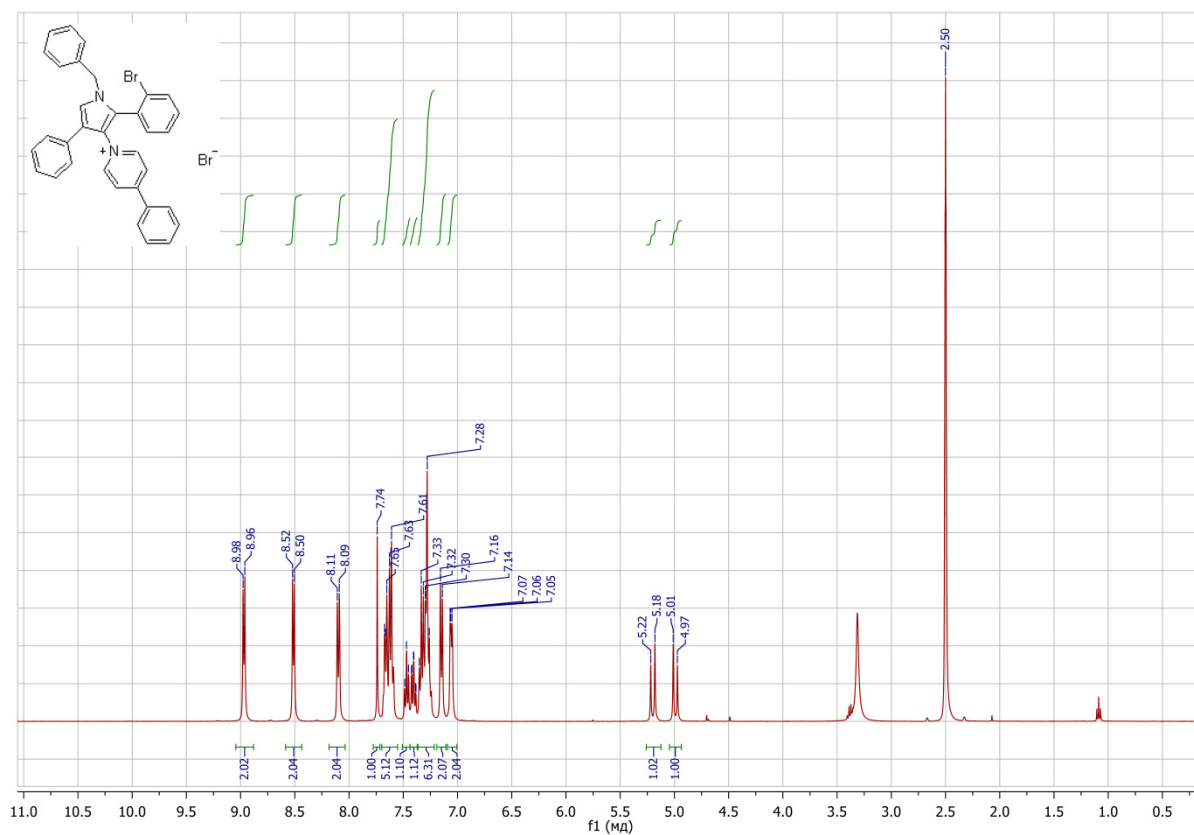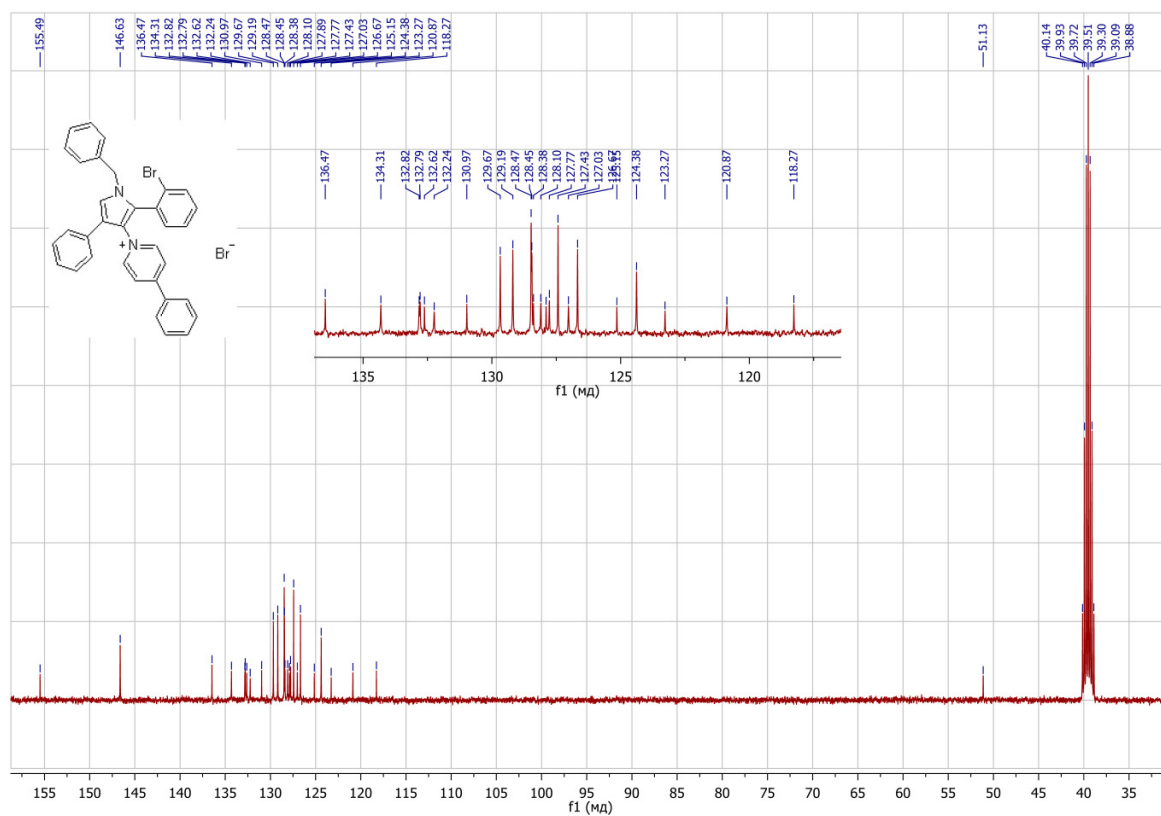

1-Methyl-3-phenyl-1*H*-pyrido[2,1-*a*]pyrrolo[3,2-*c*]isoquinolin-4-ium iodide (**8**), DMSO-*d*<sub>6</sub>

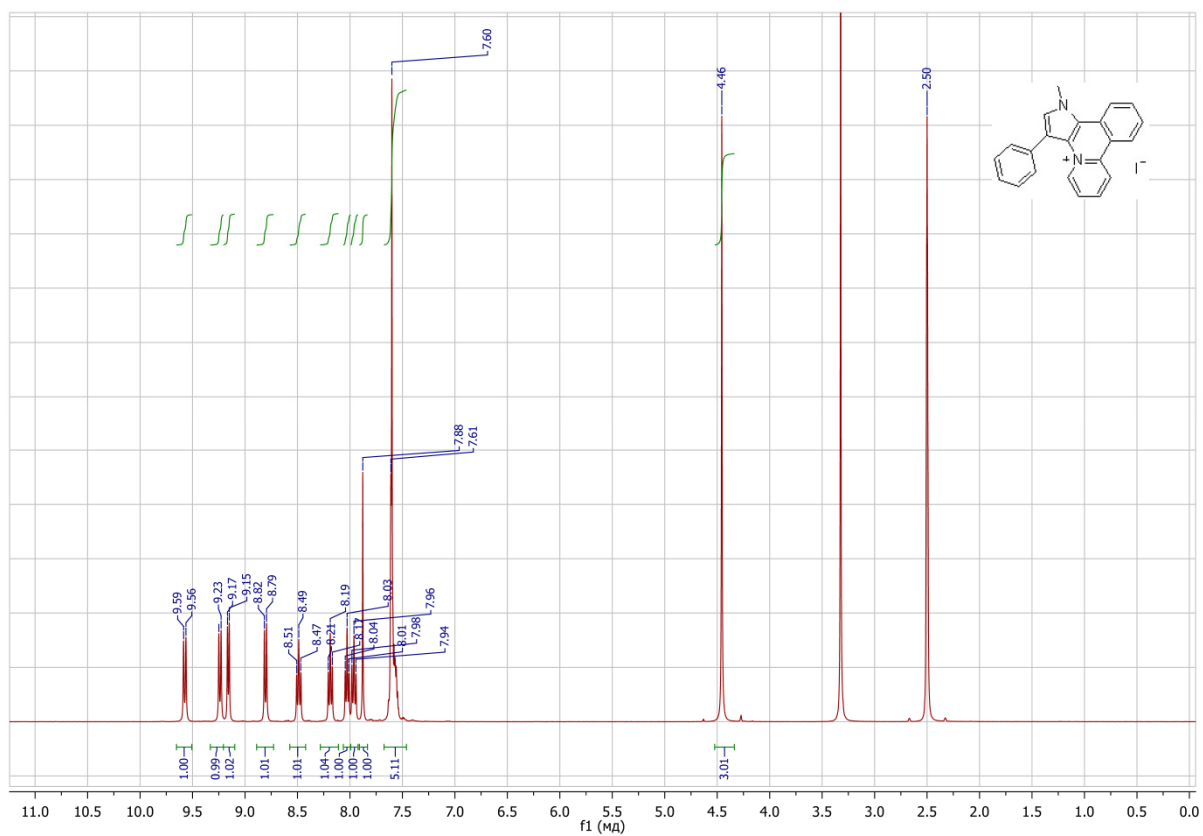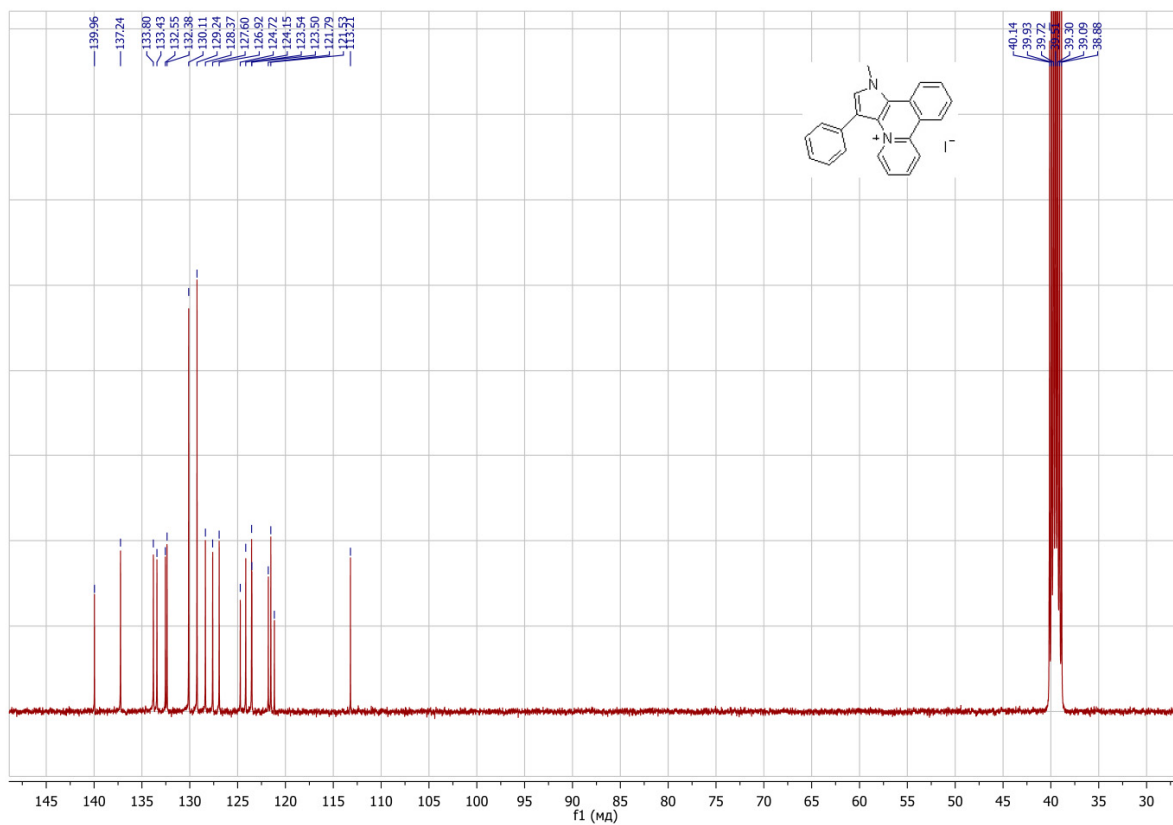

1-Benzyl-3-phenyl-1*H*-pyrido[2,1-*a*]pyrrolo[3,2-*c*]isoquinolin-4-ium bromide (**9a**), CDCl<sub>3</sub>

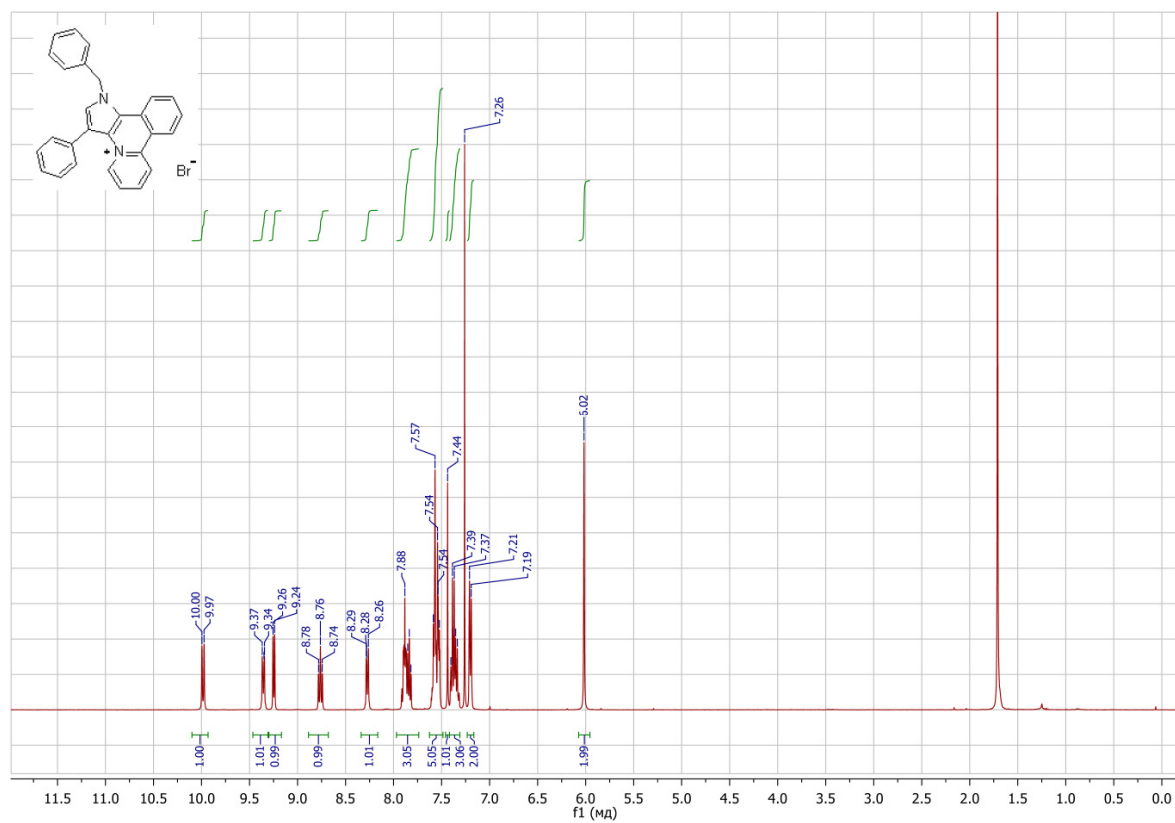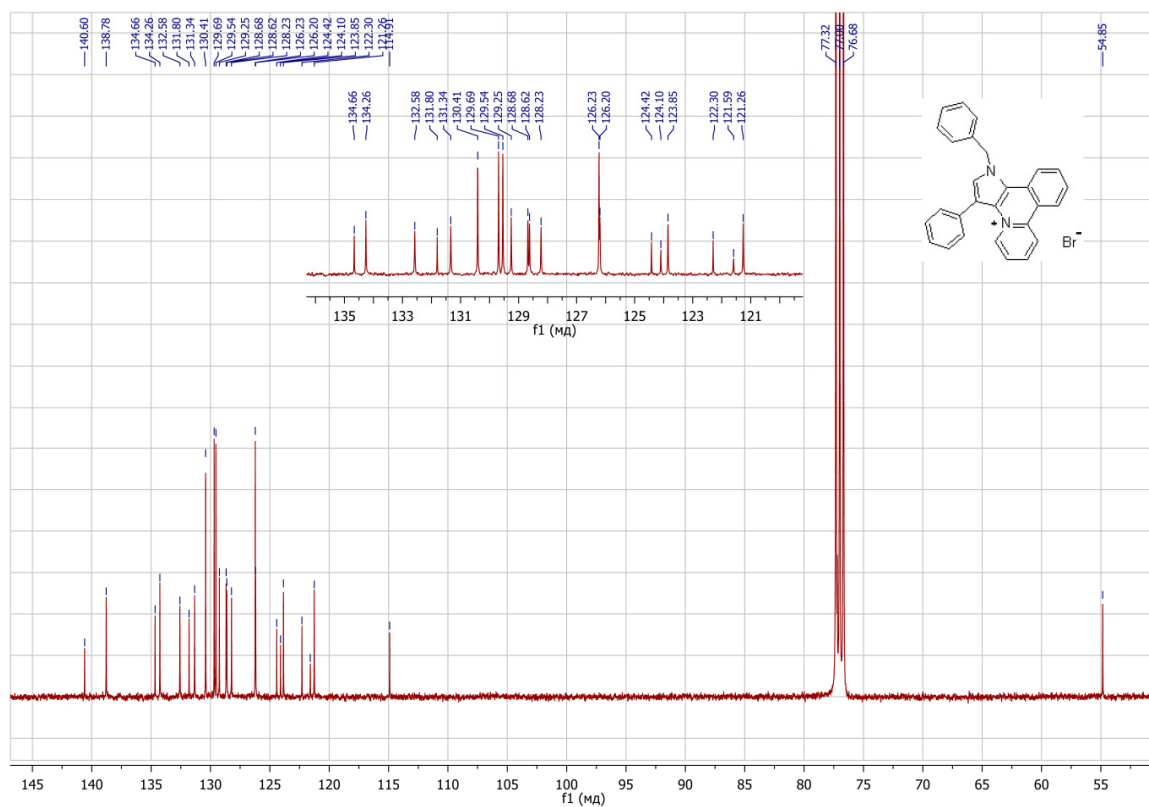

1-Benzyl-2,3-diphenyl-1*H*-pyrido[2,1-*a*]pyrrolo[3,2-*c*]isoquinolin-4-ium bromide (**9b**), DMSO-*d*<sub>6</sub>

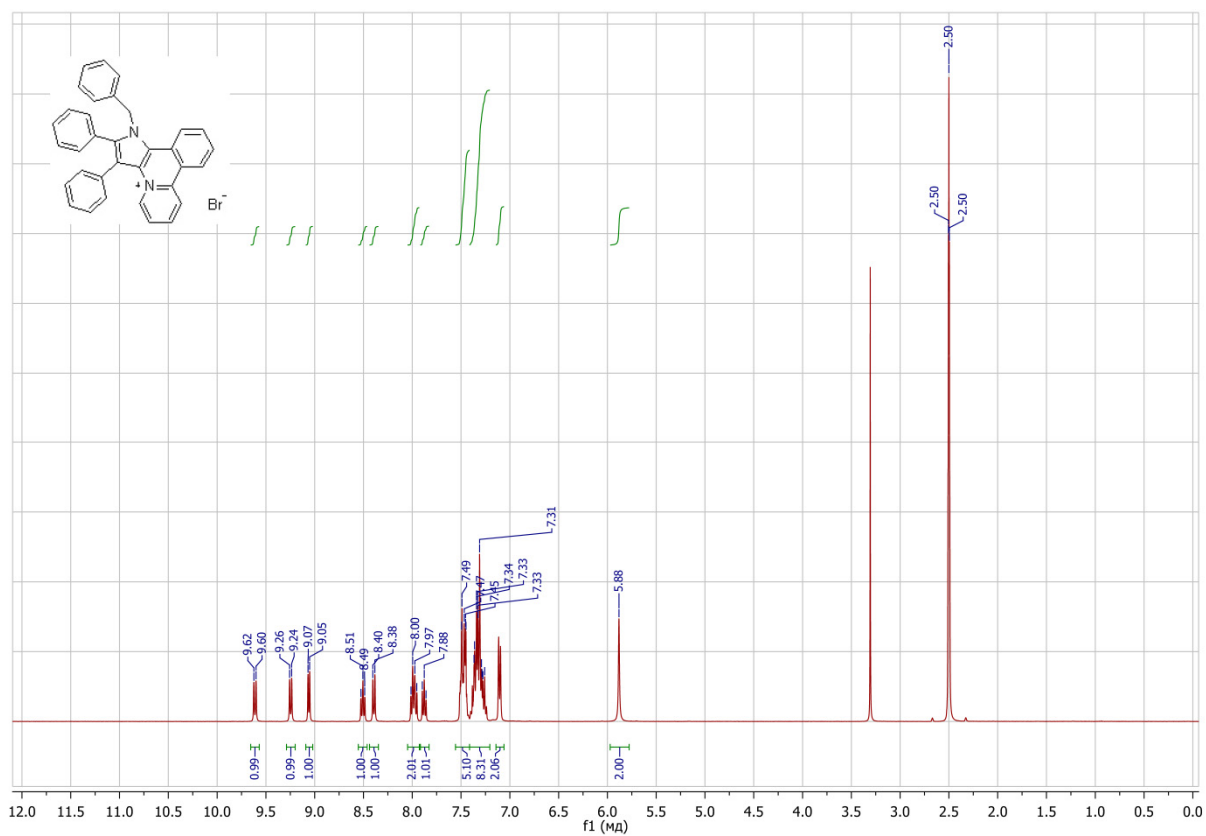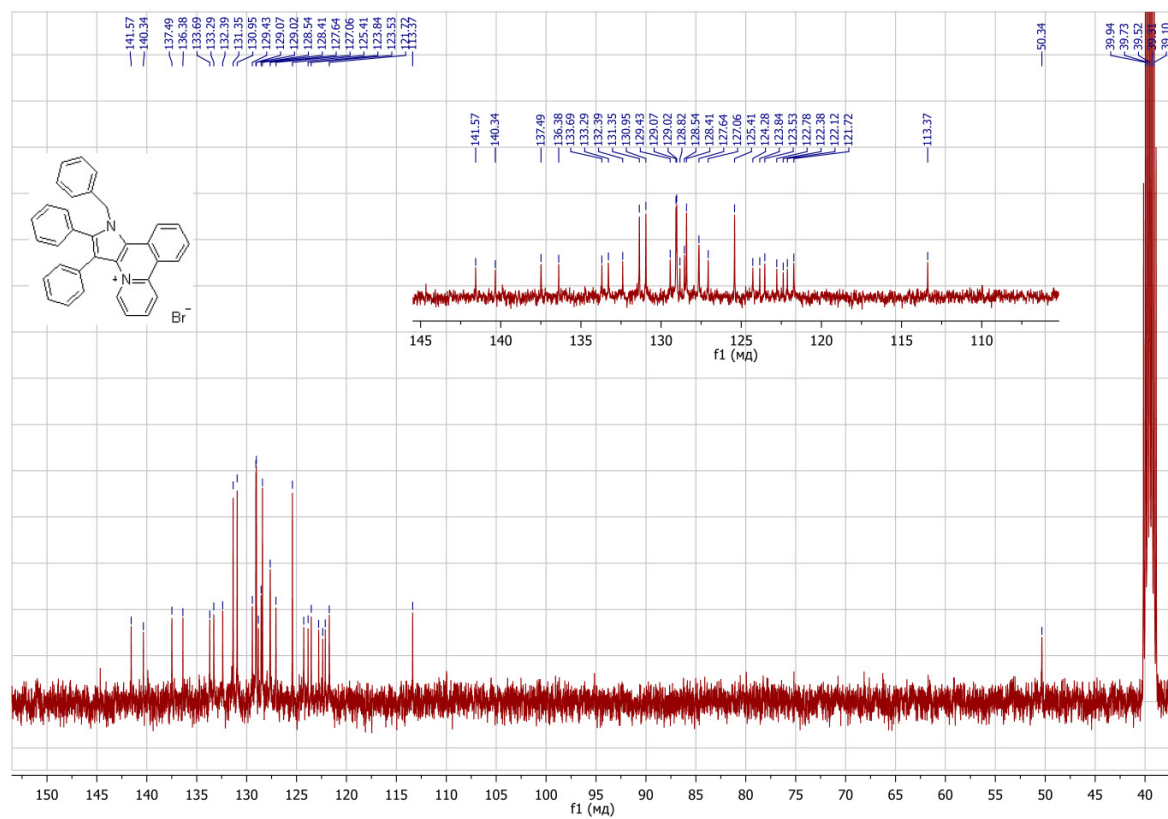

1-Benzyl-3,7-diphenyl-1*H*-pyrido[2,1-*a*]pyrrolo[3,2-*c*]isoquinolin-4-ium bromide (**9c**), DMSO-*d*<sub>6</sub>

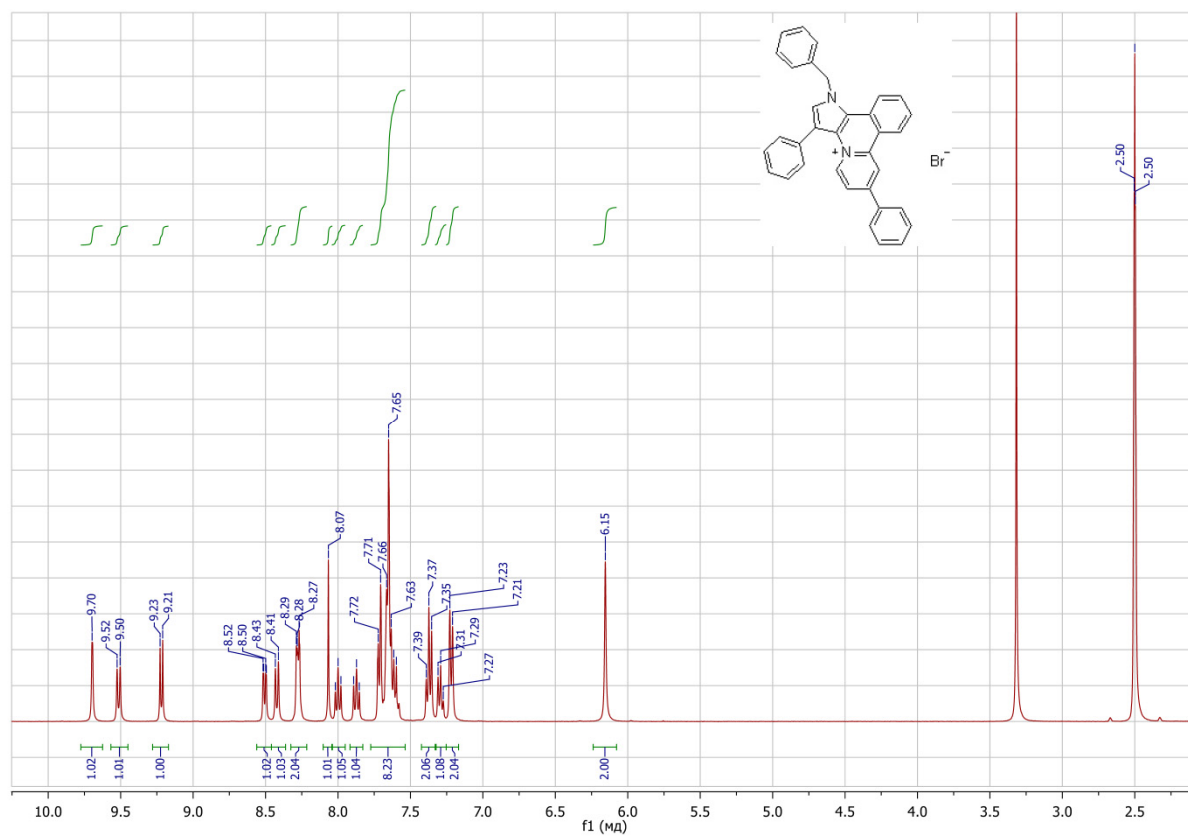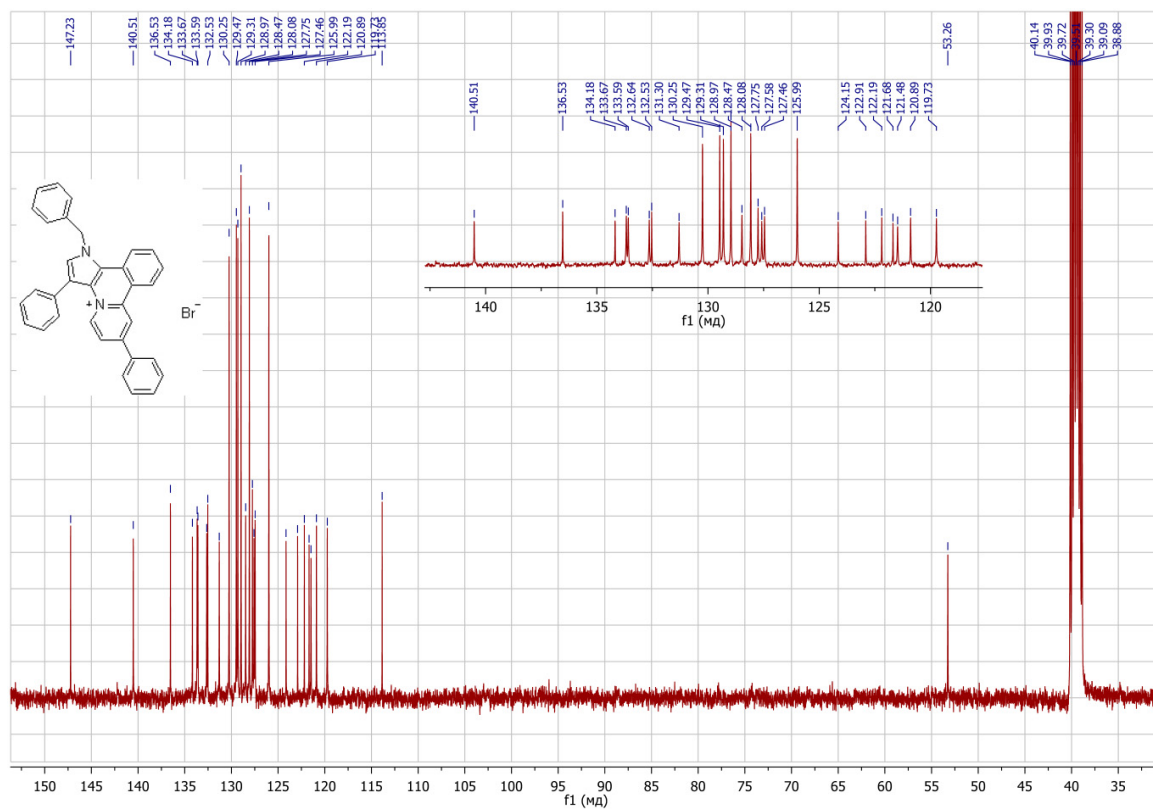



1-Benzyl-3-phenyl-5,6,7,8-tetrahydro-1*H*-pyrido[2,1-a]pyrrolo[3,2-c]isoquinolin-4-ium bromide (**10**), CDCl<sub>3</sub>

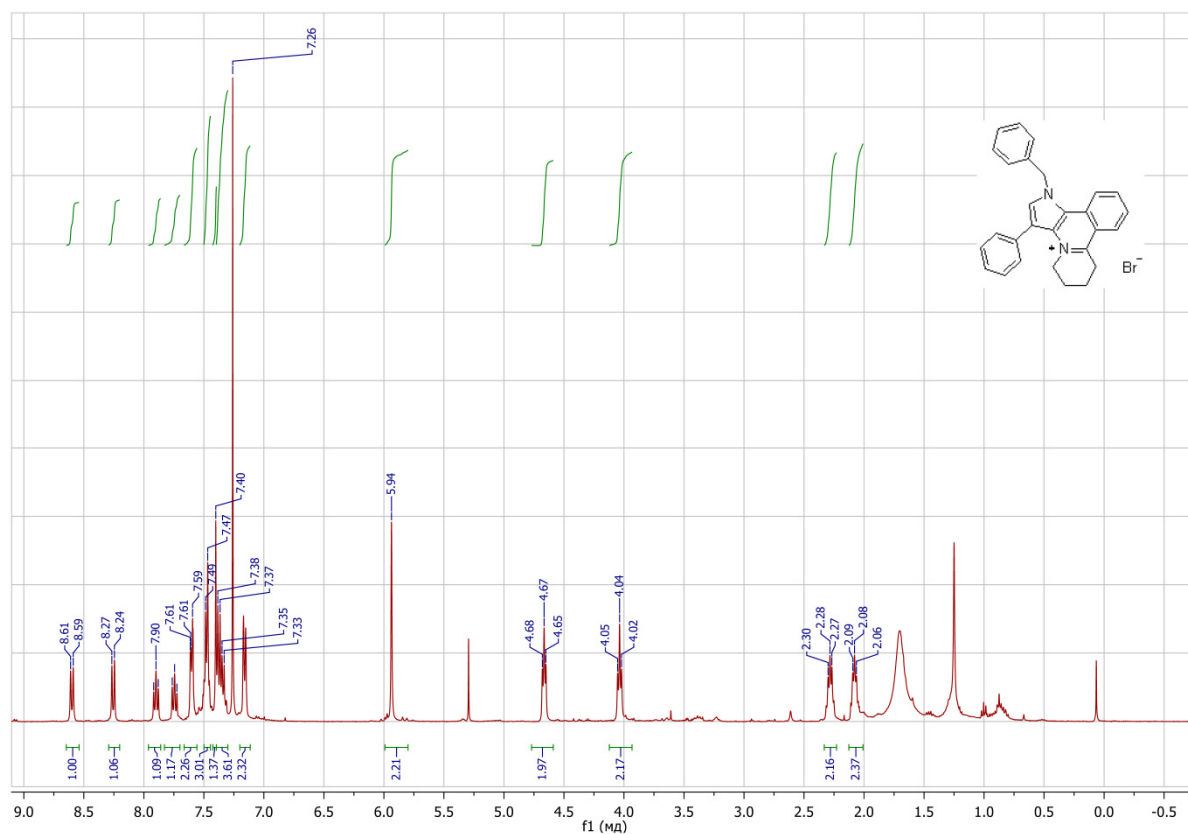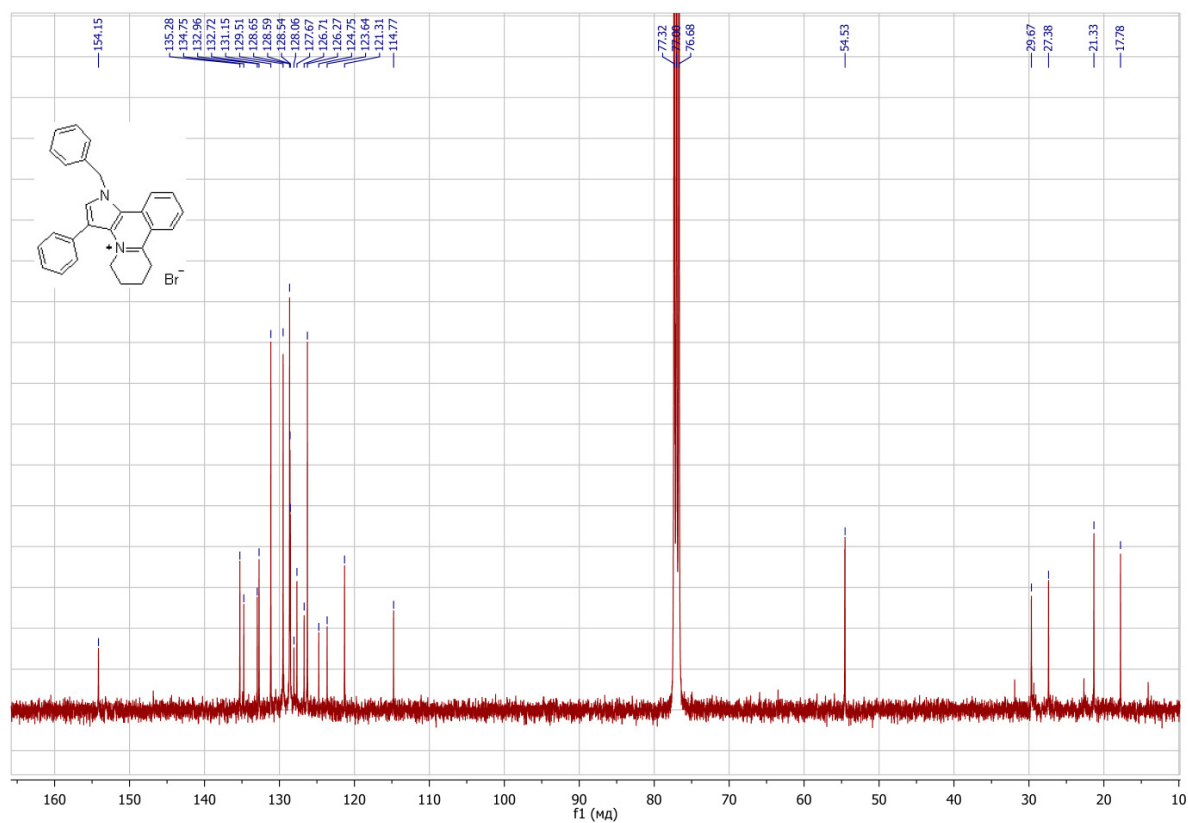

2-Phenylpyrido[2,1-a]pyrrolo[3,2-c]isoquinoline (**11**), CDCl<sub>3</sub>

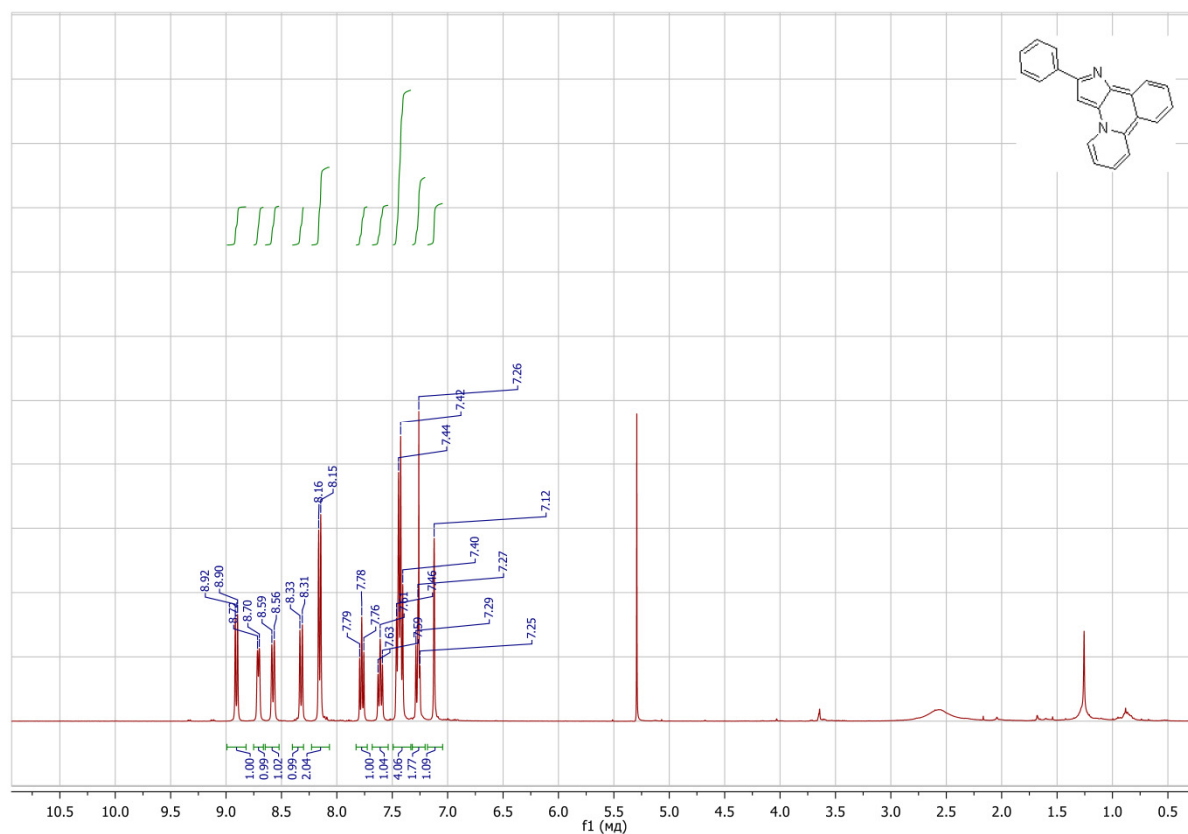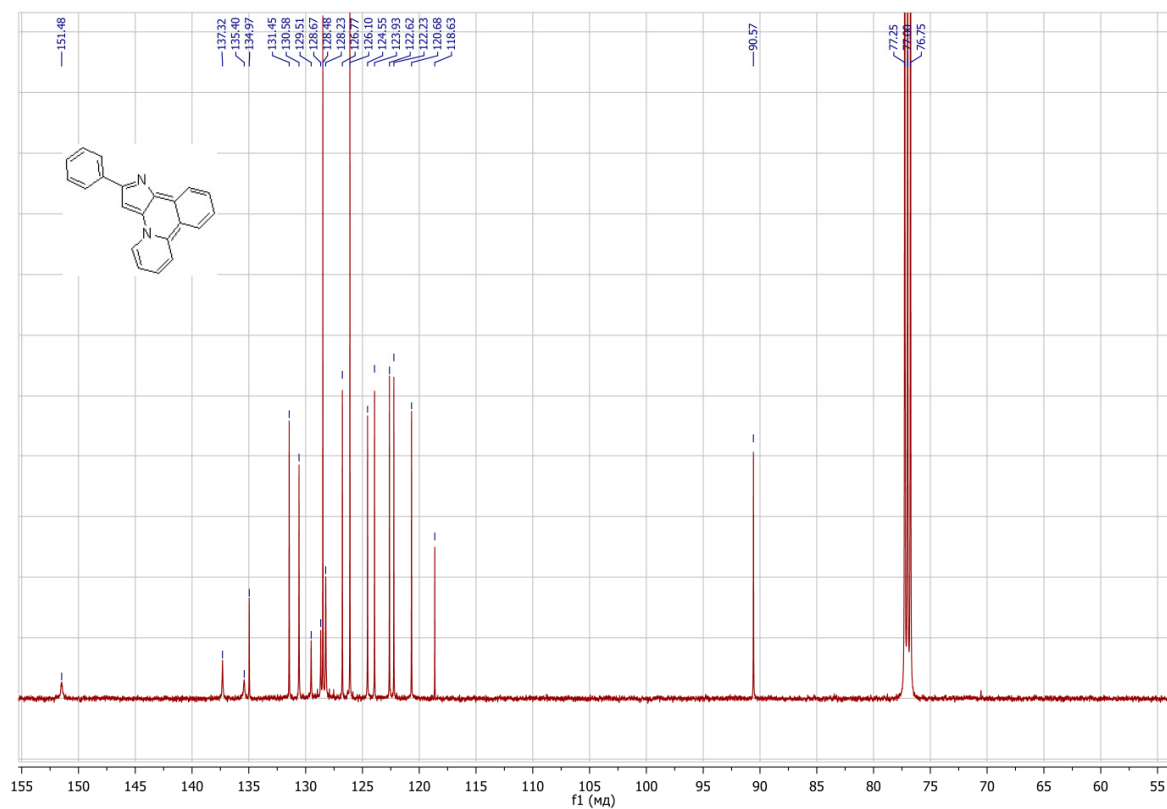

2,3-Diphenylpyrido[2,1-a]pyrrolo[3,2-c]isoquinoline (**12**), CDCl<sub>3</sub>

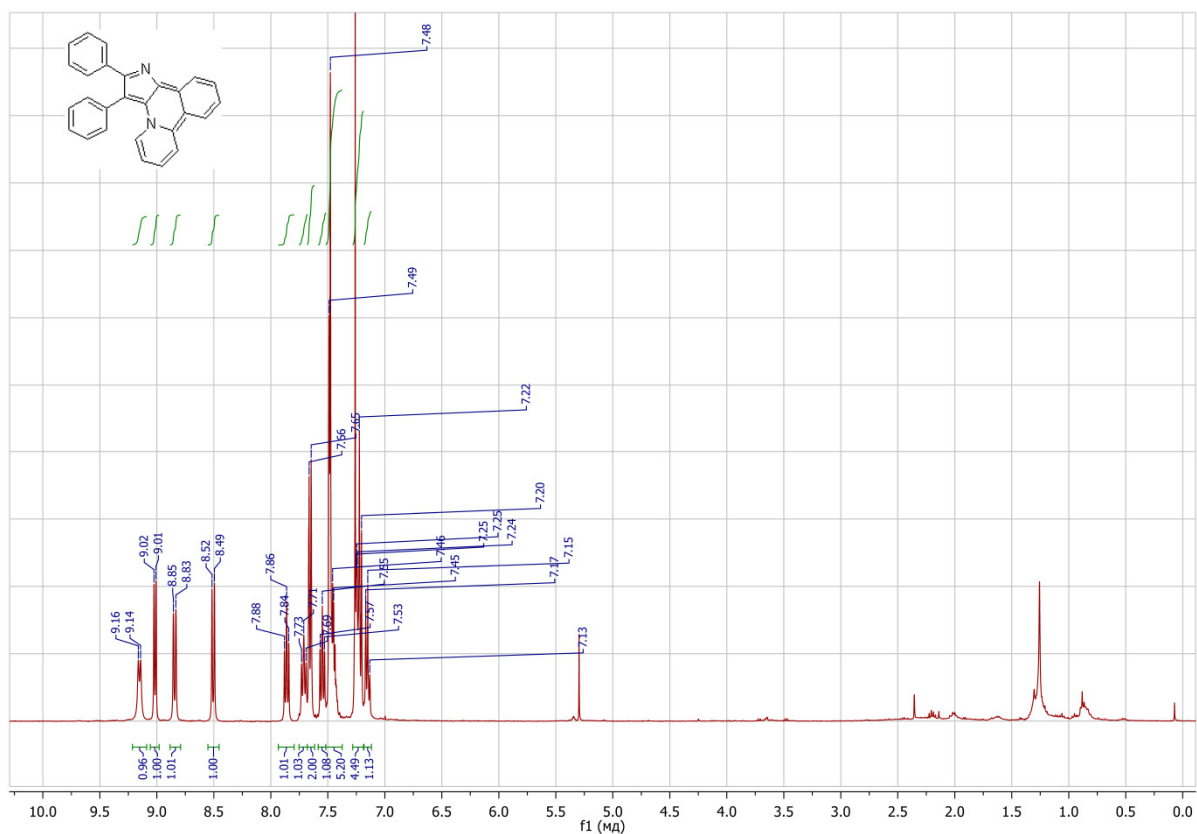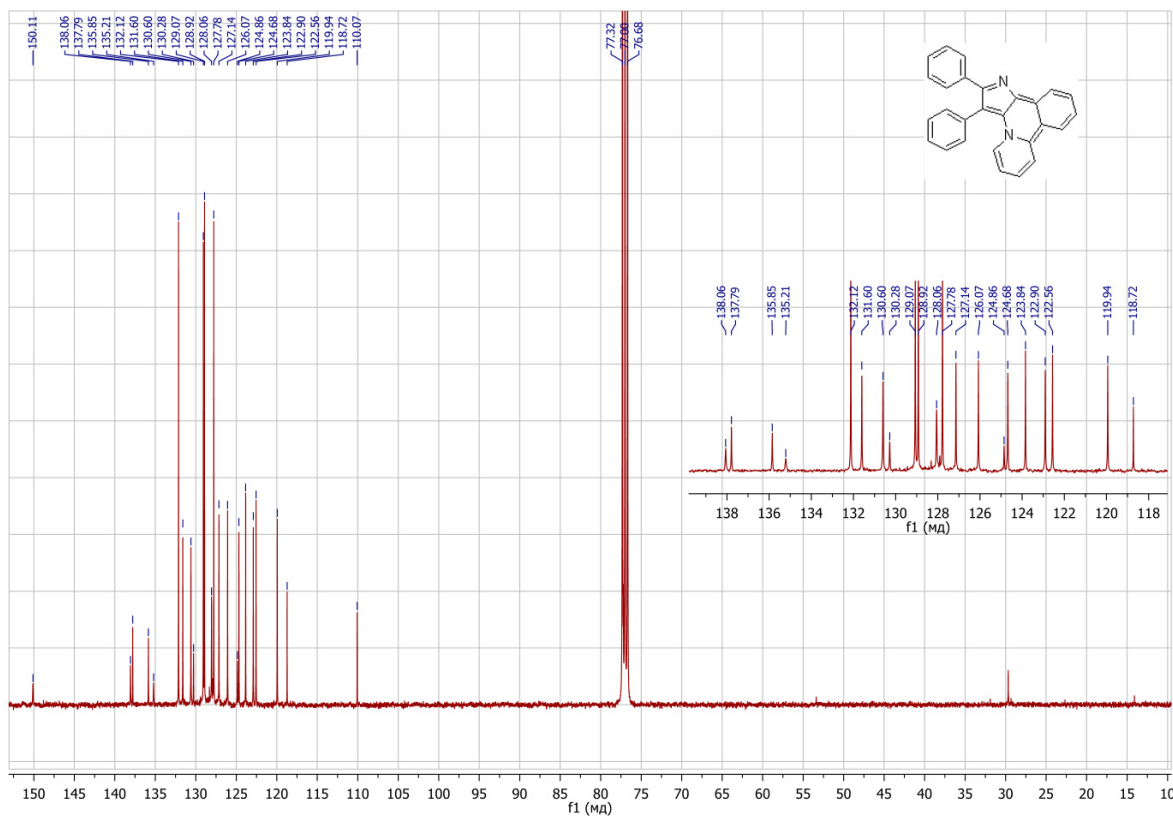

2,7-Diphenylpyrido[2,1-a]pyrrolo[3,2-c]isoquinoline (**13**), CDCl<sub>3</sub>

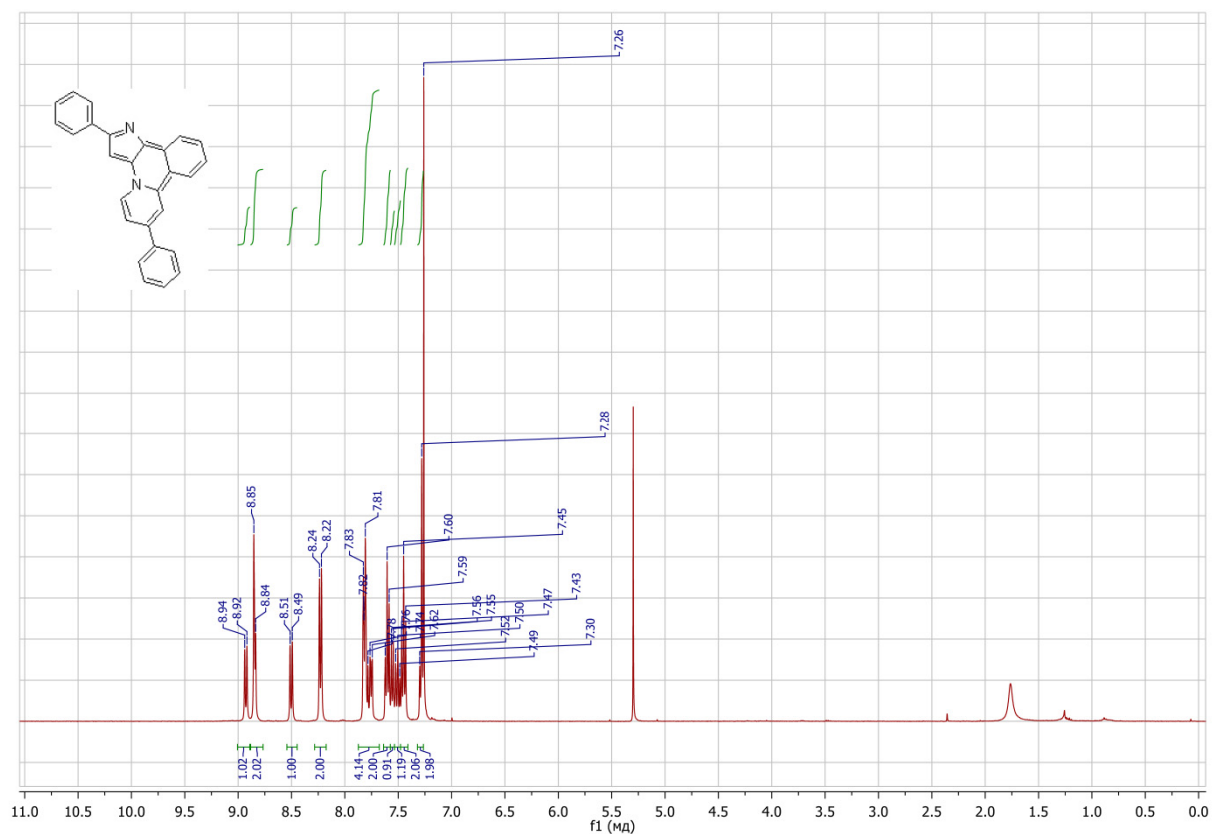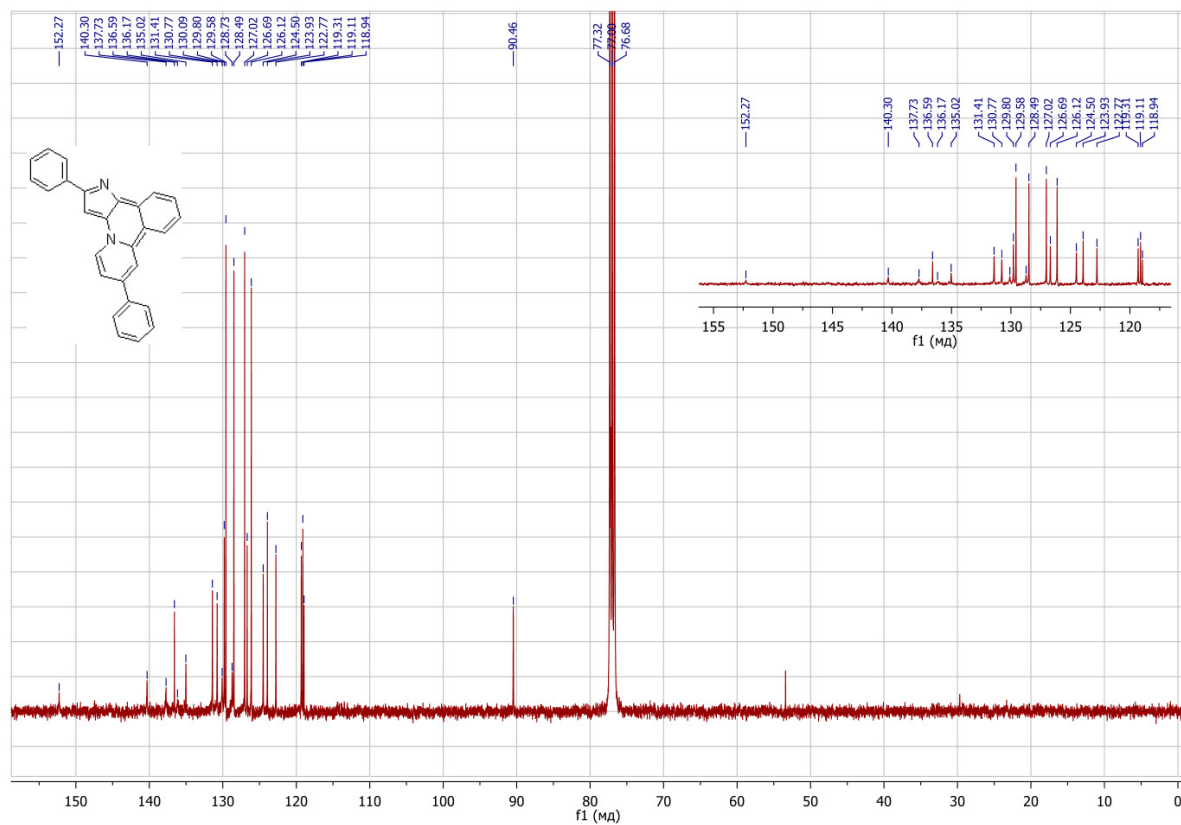

1-(4-(2-Bromophenyl)-1-methyl-2-phenyl-1H-pyrrol-3-yl)pyridin-4(1H)-one, CDCl<sub>3</sub>

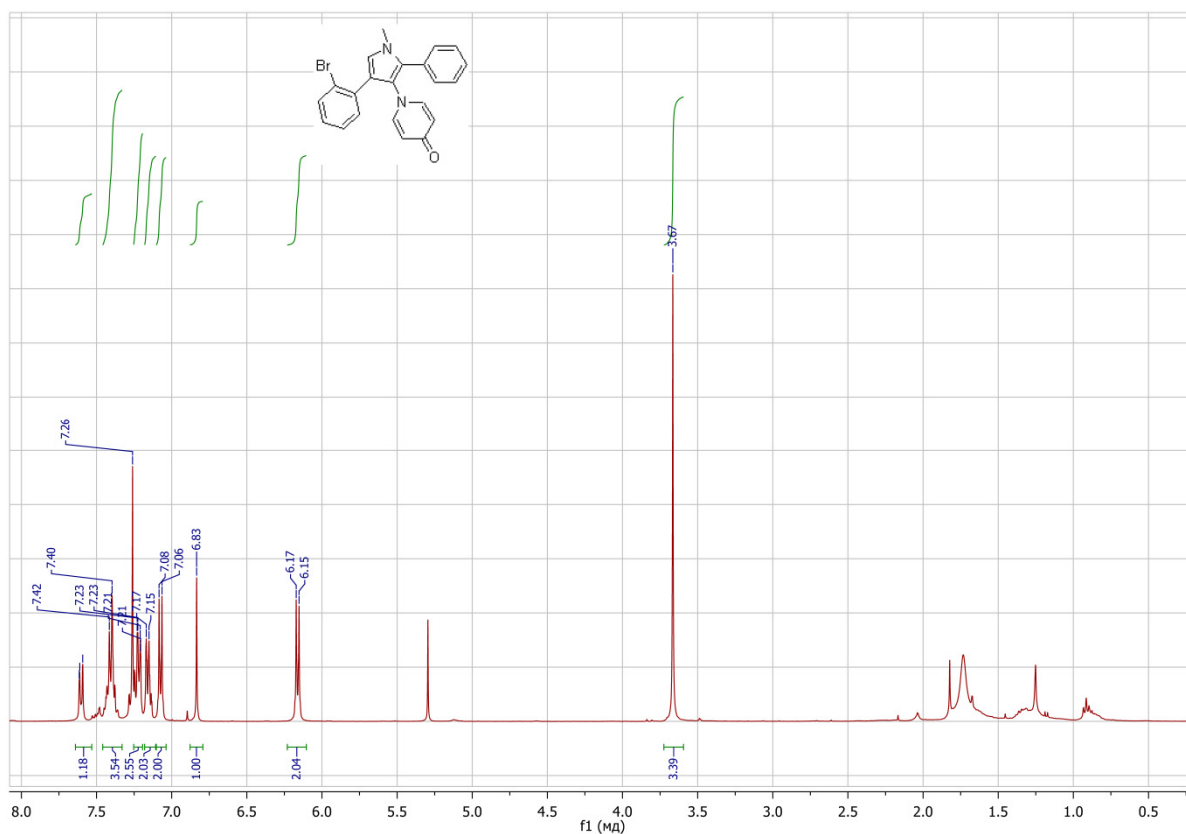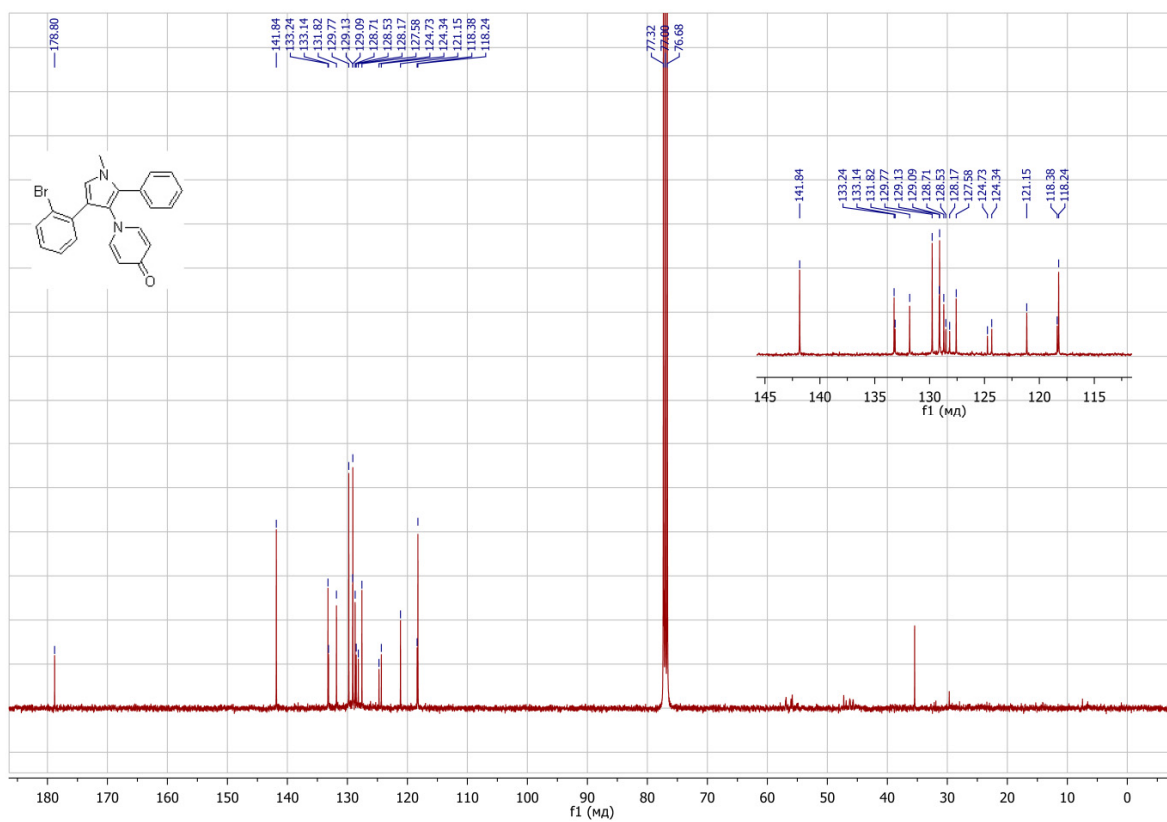

## Computational Details

All calculations were performed with the B3LYP density functional method<sup>4</sup> by using the Gaussian 09 suite of quantum chemical programs<sup>5</sup> at Resource center "Computer center of Saint Petersburg State University". Geometry optimizations of molecules were performed at the B3LYP/6-31G+(d,p) level with PCM solvent model for the solvents. The vertical excitation energies and oscillator strengths were obtained for the 10 lowest S0-S1 transitions at the optimized ground state equilibrium geometries by using the TD-DFT B3LYP/6-31G+(d,p). The emissions were calculated at the same level of theory as implemented in the Gaussian 09: Step 1: Ground state geometry optimization and frequencies (equilibrium solvation); Step 2: Vertical excitation with linear response solvation; Step 3: State-specific solvation of the vertical excitation; Step 4: Relaxation of the excited state geometry; Step 5: Vibrational frequencies of the excited state structure; Step 6: Emission state-specific solvation (part 1); Step 7: Emission to final ground state (part 2).

| Atom | Atom | X-Ray    | Calcd 11* | Calcd 11·H <sub>2</sub> O* | Atom | Atom | X-Ray    |
|------|------|----------|-----------|----------------------------|------|------|----------|
| C11  | C6   | 1.418(3) | 1.431     | 1.433                      | C6A  | C11A | 1.417(3) |
| C11  | C12  | 1.427(3) | 1.421     | 1.424                      | C12A | C11A | 1.424(3) |
| C11  | C10  | 1.411(3) | 1.418     | 1.420                      | C11A | C10A | 1.414(2) |
| N2   | C15  | 1.390(2) | 1.386     | 1.387                      | N2A  | C15A | 1.396(2) |
| N2   | C1   | 1.379(2) | 1.384     | 1.383                      | N2A  | C1A  | 1.374(2) |
| N2   | C5   | 1.383(3) | 1.403     | 1.400                      | N2A  | C5A  | 1.387(3) |
| N1   | C12  | 1.359(2) | 1.343     | 1.350                      | N1A  | C12A | 1.355(2) |
| N1   | C13  | 1.377(2) | 1.369     | 1.371                      | N1A  | C13A | 1.380(2) |
| C6   | C7   | 1.409(3) | 1.424     | 1.423                      | C6A  | C7A  | 1.414(3) |
| C6   | C5   | 1.448(3) | 1.446     | 1.445                      | C6A  | C5A  | 1.447(3) |
| C15  | C12  | 1.412(2) | 1.431     | 1.426                      | C12A | C15A | 1.411(2) |
| C15  | C14  | 1.396(3) | 1.402     | 1.403                      | C15A | C14A | 1.390(3) |
| C7   | C8   | 1.372(3) | 1.379     | 1.379                      | C8A  | C7A  | 1.371(3) |
| C1   | C2   | 1.358(3) | 1.365     | 1.365                      | C1A  | C2A  | 1.356(3) |
| C5   | C4   | 1.409(3) | 1.413     | 1.414                      | C5A  | C4A  | 1.405(3) |
| C8   | C9   | 1.399(3) | 1.416     | 1.414                      | C9A  | C8A  | 1.398(3) |
| C14  | C13  | 1.401(2) | 1.416     | 1.410                      | C13A | C14A | 1.400(3) |
| C10  | C9   | 1.372(3) | 1.377     | 1.378                      | C10A | C9A  | 1.371(3) |
| C4   | C3   | 1.361(3) | 1.378     | 1.377                      | C4A  | C3A  | 1.370(3) |
| C16  | C21  | 1.402(3) | 1.408     | 1.408                      | C16A | C21A | 1.384(3) |
| C16  | C13  | 1.468(3) | 1.470     | 1.471                      | C13A | C16A | 1.465(3) |
| C16  | C17  | 1.385(3) | 1.409     | 1.408                      | C16A | C17A | 1.405(3) |
| C21  | C20  | 1.388(3) | 1.395     | 1.395                      | C21A | C20A | 1.388(3) |
| C2   | C3   | 1.395(3) | 1.412     | 1.412                      | C2A  | C3A  | 1.398(3) |
| C19  | C20  | 1.386(3) | 1.399     | 1.399                      | C20A | C19A | 1.378(3) |
| C19  | C18  | 1.387(3) | 1.399     | 1.398                      | C19A | C18A | 1.390(4) |
| C17  | C18  | 1.390(3) | 1.394     | 1.395                      | C17A | C18A | 1.382(3) |

<sup>4</sup> (a) Becke, A. D. *J. Chem. Phys.* **1993**, *98*, 5648. (b) Becke, A. D. *Phys. Rev. A* **1988**, *38*, 3098. (c) Lee, C.; Yang, W.; Parr, R. G. *Phys. Rev. B* **1988**, *37*, 785.

<sup>5</sup> **Gaussian 09, Revision D.01**, Frisch, M. J.; Trucks, G. W.; Schlegel, H. B.; Scuseria, G. E.; Robb, M. A.; Cheeseman, J. R.; Scalmani, G.; Barone, V.; Mennucci, B.; Petersson, G. A.; Nakatsuji, H.; Caricato, M.; Li, X.; Hratchian, H. P.; Izmaylov, A. F.; Bloino, J.; Zheng, G.; Sonnenberg, J. L.; Hada, M.; Ehara, M.; Toyota, K.; Fukuda, R.; Hasegawa, J.; Ishida, M.; Nakajima, T.; Honda, Y.; Kitao, O.; Nakai, H.; Vreven, T.; Montgomery, J. A.; Peralta, J. E.; Ogliaro, F.; Bearpark, M.; Heyd, J. J.; Brothers, E.; Kudin, K. N.; Staroverov, V. N.; Keith, T.; Kobayashi, R.; Normand, J.; Raghavachari, K.; Rendell, A.; Burant, J. C.; Iyengar, S. S.; Tomasi, J.; Cossi, M.; Rega, N.; Millam, N. J.; Klene, M.; Knox, J. E.; Cross, J. B.; Bakken, V.; Adamo, C.; Jaramillo, J.; Gomperts, R.; Stratmann, R. E.; Yazyev, O.; Austin, A. J.; Cammi, R.; Pomelli, C.; Ochterski, J. W.; Martin, R. L.; Morokuma, K.; Zakrzewski, V. G.; Voth, G. A.; Salvador, P.; Dannenberg, J. J.; Dapprich, S.; Daniels, A. D.; Farkas, Ö.; Foresman, J. B.; Ortiz, J. V.; Cioslowski, J.; Fox, D. J. Gaussian, Inc.; Wallingford CT, **2013**.

| Table S31. Bond Angles for compound for compound <b>11</b> and <b>11</b> ·H <sub>2</sub> O (°) |      |      |            |                   |                                    |      |      |      |            |
|------------------------------------------------------------------------------------------------|------|------|------------|-------------------|------------------------------------|------|------|------|------------|
| Atom                                                                                           | Atom | Atom | X-Ray      | Calcd <b>11</b> * | Calcd <b>11</b> ·H <sub>2</sub> O* | Atom | Atom | Atom | X-Ray      |
| C6                                                                                             | C11  | C12  | 117.53(16) | 117.92            | 117.48                             | C6A  | C11A | C12A | 117.53(17) |
| C10                                                                                            | C11  | C6   | 119.51(18) | 119.92            | 119.67                             | C10A | C11A | C6A  | 119.52(18) |
| C10                                                                                            | C11  | C12  | 122.94(17) | 122.16            | 122.86                             | C10A | C11A | C12A | 122.93(17) |
| C1                                                                                             | N2   | C15  | 118.86(17) | 119.19            | 119.19                             | C1A  | N2A  | C15A | 119.01(18) |
| C1                                                                                             | N2   | C5   | 120.66(17) | 120.32            | 120.51                             | C1A  | N2A  | C5A  | 120.79(18) |
| C5                                                                                             | N2   | C15  | 120.48(16) | 120.50            | 120.38                             | C5A  | N2A  | C15A | 120.20(16) |
| C12                                                                                            | N1   | C13  | 105.13(15) | 105.65            | 106.12                             | C12A | N1A  | C13A | 104.88(15) |
| C11                                                                                            | C6   | C5   | 120.94(18) | 120.59            | 120.85                             | C11A | C6A  | C5A  | 121.08(18) |
| C7                                                                                             | C6   | C11  | 118.43(18) | 117.85            | 118.09                             | C7A  | C6A  | C11A | 118.17(17) |
| C7                                                                                             | C6   | C5   | 120.62(18) | 121.56            | 121.06                             | C7A  | C6A  | C5A  | 120.75(18) |
| N2                                                                                             | C15  | C12  | 121.18(17) | 120.89            | 121.10                             | N2A  | C15A | C12A | 121.06(18) |
| N2                                                                                             | C15  | C14  | 131.47(17) | 132.33            | 131.67                             | C14A | C15A | N2A  | 131.18(18) |
| C14                                                                                            | C15  | C12  | 107.26(16) | 106.78            | 107.22                             | C14A | C15A | C12A | 107.71(17) |
| C8                                                                                             | C7   | C6   | 121.15(19) | 121.21            | 121.19                             | C8A  | C7A  | C6A  | 121.21(19) |
| C2                                                                                             | C1   | N2   | 121.4(2)   | 122.19            | 122.13                             | C2A  | C1A  | N2A  | 121.5(2)   |
| N2                                                                                             | C5   | C6   | 119.32(17) | 119.51            | 119.50                             | N2A  | C5A  | C6A  | 119.36(17) |
| N2                                                                                             | C5   | C4   | 117.05(18) | 116.82            | 116.76                             | N2A  | C5A  | C4A  | 117.11(18) |
| C4                                                                                             | C5   | C6   | 123.63(19) | 123.67            | 123.74                             | C4A  | C5A  | C6A  | 123.5(2)   |
| N1                                                                                             | C12  | C11  | 128.95(16) | 128.51            | 129.18                             | N1A  | C12A | C11A | 128.74(16) |
| N1                                                                                             | C12  | C15  | 110.60(17) | 110.90            | 110.14                             | N1A  | C12A | C15A | 110.55(17) |
| C15                                                                                            | C12  | C11  | 120.42(16) | 120.60            | 120.68                             | C15A | C12A | C11A | 120.68(18) |
| C7                                                                                             | C8   | C9   | 120.07(19) | 120.38            | 120.21                             | C7A  | C8A  | C9A  | 120.24(19) |
| C15                                                                                            | C14  | C13  | 104.80(16) | 104.15            | 104.36                             | C15A | C14A | C13A | 104.45(17) |
| C9                                                                                             | C10  | C11  | 120.27(18) | 120.56            | 120.39                             | C9A  | C10A | C11A | 120.49(18) |
| C3                                                                                             | C4   | C5   | 122.1(2)   | 122.78            | 122.78                             | C3A  | C4A  | C5A  | 122.0(2)   |
| C21                                                                                            | C16  | C13  | 120.36(18) | 121.84            | 121.85                             | C21A | C16A | C13A | 121.29(18) |
| C17                                                                                            | C16  | C21  | 118.14(19) | 118.16            | 118.24                             | C21A | C16A | C17A | 118.2(2)   |
| C17                                                                                            | C16  | C13  | 121.49(18) | 120.00            | 120.91                             | C17A | C16A | C13A | 120.53(19) |
| C10                                                                                            | C9   | C8   | 120.56(19) | 120.08            | 120.45                             | C10A | C9A  | C8A  | 120.35(18) |
| C20                                                                                            | C21  | C16  | 120.8(2)   | 120.97            | 120.99                             | C16A | C21A | C20A | 121.1(2)   |
| N1                                                                                             | C13  | C14  | 112.20(16) | 112.53            | 112.16                             | N1A  | C13A | C14A | 112.41(17) |
| N1                                                                                             | C13  | C16  | 121.29(16) | 120.37            | 121.58                             | N1A  | C13A | C16A | 120.73(17) |
| C14                                                                                            | C13  | C16  | 126.47(17) | 127.10            | 126.26                             | C14A | C13A | C16A | 126.83(18) |
| C1                                                                                             | C2   | C3   | 119.3(2)   | 119.29            | 119.20                             | C1A  | C2A  | C3A  | 119.5(2)   |
| C20                                                                                            | C19  | C18  | 119.2(2)   | 119.33            | 119.37                             | C20A | C19A | C18A | 119.0(2)   |
| C19                                                                                            | C20  | C21  | 120.4(2)   | 120.28            | 120.21                             | C19A | C20A | C21A | 120.6(2)   |
| C4                                                                                             | C3   | C2   | 119.4(2)   | 118.61            | 118.70                             | C4A  | C3A  | C2A  | 119.1(2)   |
| C16                                                                                            | C17  | C18  | 121.1(2)   | 120.80            | 120.65                             | C18A | C17A | C16A | 120.4(2)   |
| C19                                                                                            | C18  | C17  | 120.3(2)   | 120.45            | 120.53                             | C17A | C18A | C19A | 120.8(2)   |

\*Geometry optimizations of **11** and **11**·H<sub>2</sub>O in the gas phase were performed at the B3LYP/6-31G+(d,p) level.



Figure S6. Frontier MO of **11** and complexes of **11** with MeOH (DFT B3LYP/6-31+G(d,p), PCM for MeOH).

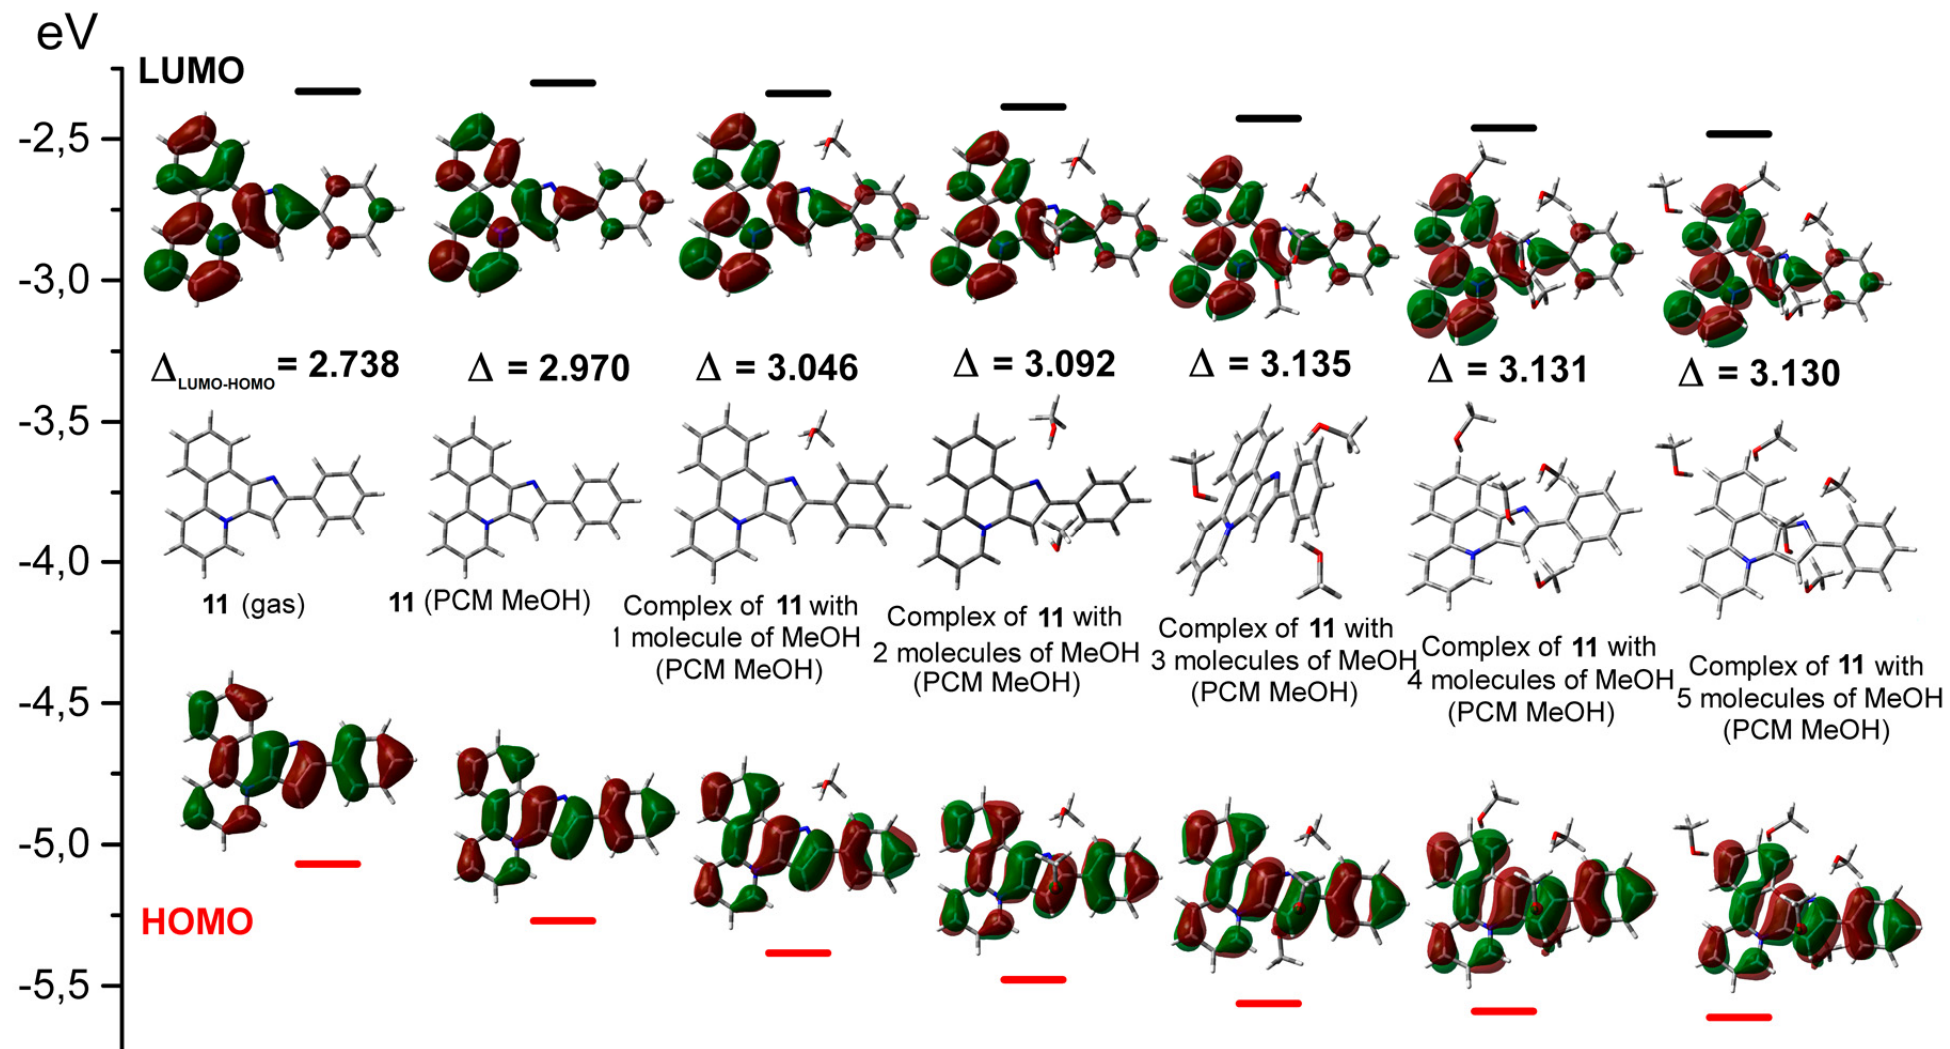



Table S32. Calculated UV-VIS spectra and excited states for 11 and H-complexes 11

11 (gas phase)

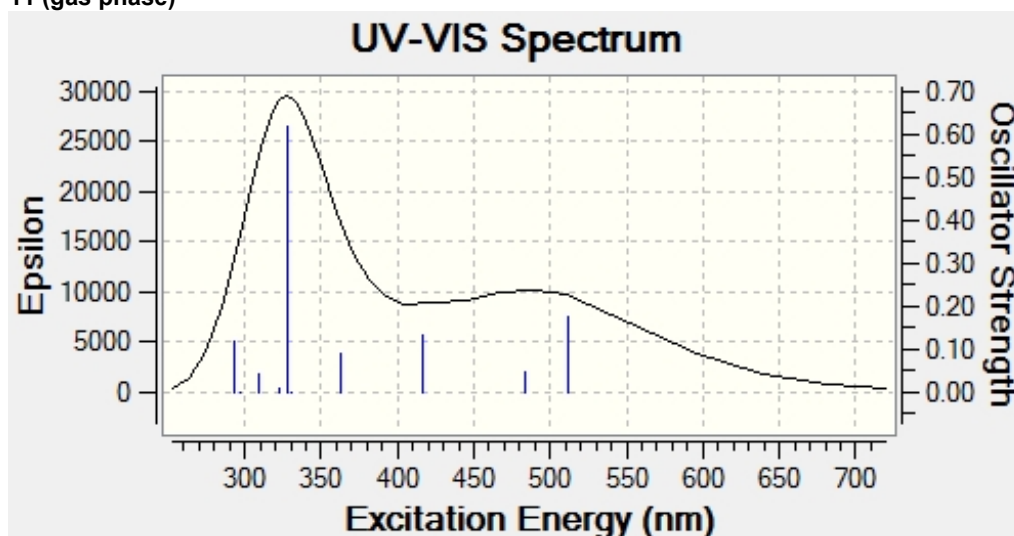

|                   |           |           |           |          |              |
|-------------------|-----------|-----------|-----------|----------|--------------|
| Excited State 1:  | Singlet-A | 2.4249 eV | 511.31 nm | f=0.1772 | <S**2>=0.000 |
|                   | 76 -> 78  | -0.24406  |           |          |              |
|                   | 77 -> 78  | 0.62199   |           |          |              |
|                   | 77 -> 79  | -0.21526  |           |          |              |
| Excited State 2:  | Singlet-A | 2.5650 eV | 483.37 nm | f=0.0471 | <S**2>=0.000 |
|                   | 77 -> 78  | 0.24126   |           |          |              |
|                   | 77 -> 79  | 0.65296   |           |          |              |
| Excited State 3:  | Singlet-A | 2.9742 eV | 416.87 nm | f=0.1313 | <S**2>=0.000 |
|                   | 76 -> 78  | 0.62673   |           |          |              |
|                   | 76 -> 79  | -0.11992  |           |          |              |
|                   | 77 -> 78  | 0.18133   |           |          |              |
|                   | 77 -> 79  | -0.13626  |           |          |              |
|                   | 77 -> 80  | 0.17827   |           |          |              |
| Excited State 4:  | Singlet-A | 3.4136 eV | 363.20 nm | f=0.0886 | <S**2>=0.000 |
|                   | 72 -> 78  | 0.12104   |           |          |              |
|                   | 76 -> 79  | 0.67079   |           |          |              |
|                   | 77 -> 78  | 0.10434   |           |          |              |
| Excited State 5:  | Singlet-A | 3.7518 eV | 330.47 nm | f=0.0000 | <S**2>=0.000 |
|                   | 73 -> 78  | 0.70513   |           |          |              |
| Excited State 6:  | Singlet-A | 3.7741 eV | 328.51 nm | f=0.6168 | <S**2>=0.000 |
|                   | 72 -> 78  | 0.10745   |           |          |              |
|                   | 74 -> 78  | -0.10714  |           |          |              |
|                   | 76 -> 78  | -0.15801  |           |          |              |
|                   | 77 -> 80  | 0.65016   |           |          |              |
| Excited State 7:  | Singlet-A | 3.8466 eV | 322.32 nm | f=0.0096 | <S**2>=0.000 |
|                   | 75 -> 78  | 0.69244   |           |          |              |
| Excited State 8:  | Singlet-A | 4.0140 eV | 308.88 nm | f=0.0426 | <S**2>=0.000 |
|                   | 72 -> 78  | 0.12193   |           |          |              |
|                   | 74 -> 78  | 0.65882   |           |          |              |
|                   | 77 -> 82  | -0.12895  |           |          |              |
| Excited State 9:  | Singlet-A | 4.1646 eV | 297.71 nm | f=0.0000 | <S**2>=0.000 |
|                   | 77 -> 81  | 0.69739   |           |          |              |
| Excited State 10: | Singlet-A | 4.2362 eV | 292.68 nm | f=0.1186 | <S**2>=0.000 |
|                   | 72 -> 78  | 0.52711   |           |          |              |
|                   | 74 -> 79  | 0.33600   |           |          |              |
|                   | 75 -> 79  | 0.11586   |           |          |              |
|                   | 76 -> 79  | -0.10244  |           |          |              |
|                   | 76 -> 80  | 0.10606   |           |          |              |
|                   | 77 -> 80  | -0.10046  |           |          |              |
|                   | 77 -> 84  | -0.14143  |           |          |              |
|                   | 77 -> 85  | -0.11863  |           |          |              |

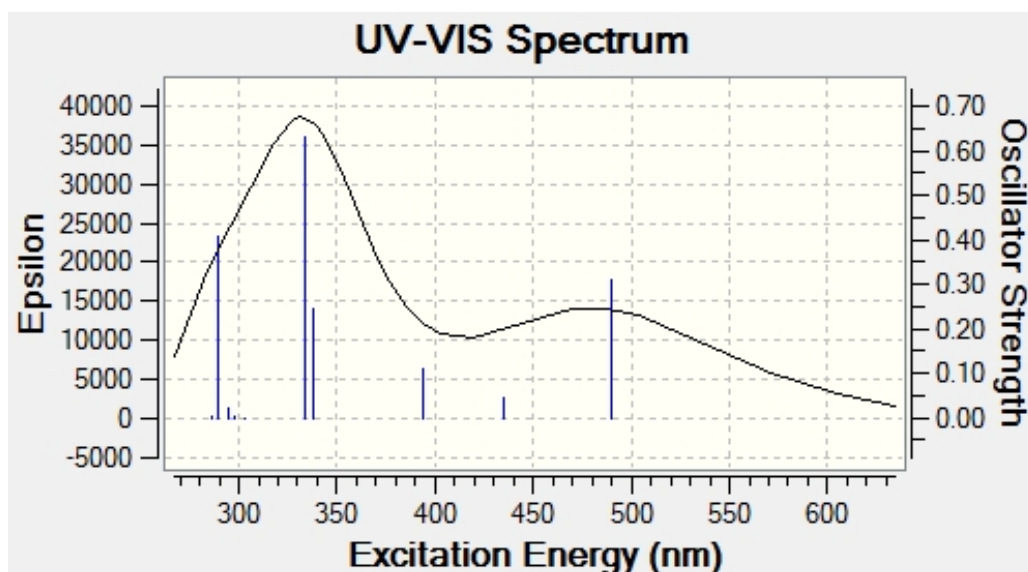

|                  |           |                  |                  |                 |              |
|------------------|-----------|------------------|------------------|-----------------|--------------|
| Excited State 1: | Singlet-A | <b>2.5356 eV</b> | <b>488.97 nm</b> | <b>f=0.3109</b> | <S**2>=0.000 |
| 76 -> 78         |           | -0.14721         |                  |                 |              |
| 77 -> 78         |           | 0.67958          |                  |                 |              |
| 77 -> 79         |           | -0.10010         |                  |                 |              |
| Excited State 2: | Singlet-A | 2.8470 eV        | 435.48 nm        | f=0.0413        | <S**2>=0.000 |
| 76 -> 78         |           | 0.14302          |                  |                 |              |
| 77 -> 78         |           | 0.12653          |                  |                 |              |
| 77 -> 79         |           | 0.67447          |                  |                 |              |
| Excited State 3: | Singlet-A | 3.1557 eV        | 392.89 nm        | f=0.1166        | <S**2>=0.000 |
| 76 -> 78         |           | 0.64848          |                  |                 |              |
| 77 -> 78         |           | 0.10951          |                  |                 |              |
| 77 -> 79         |           | -0.15955         |                  |                 |              |
| 77 -> 80         |           | 0.16644          |                  |                 |              |
| Excited State 4: | Singlet-A | 3.6711 eV        | 337.73 nm        | f=0.1974        | <S**2>=0.000 |
| 73 -> 78         |           | -0.17515         |                  |                 |              |
| 76 -> 79         |           | 0.44893          |                  |                 |              |
| 77 -> 80         |           | 0.49862          |                  |                 |              |
| Excited State 5: | Singlet-A | 3.7157 eV        | 333.67 nm        | f=0.6819        | <S**2>=0.000 |
| 76 -> 78         |           | 0.13162          |                  |                 |              |
| 76 -> 79         |           | 0.50947          |                  |                 |              |
| 77 -> 80         |           | -0.45387         |                  |                 |              |
| Excited State 6: | Singlet-A | 4.1170 eV        | 301.15 nm        | f=0.0003        | <S**2>=0.000 |
| 72 -> 78         |           | 0.68852          |                  |                 |              |
| 75 -> 78         |           | 0.13511          |                  |                 |              |
| Excited State 7: | Singlet-A | 4.1590 eV        | 298.11 nm        | f=0.0054        | <S**2>=0.000 |
| 72 -> 78         |           | -0.14722         |                  |                 |              |
| 75 -> 78         |           | 0.52271          |                  |                 |              |
| 77 -> 81         |           | -0.39569         |                  |                 |              |
| 77 -> 82         |           | 0.17240          |                  |                 |              |
| Excited State 8: | Singlet-A | 4.2060 eV        | 294.78 nm        | f=0.0217        | <S**2>=0.000 |
| 73 -> 78         |           | -0.23903         |                  |                 |              |
| 74 -> 78         |           | 0.60509          |                  |                 |              |
| 75 -> 78         |           | -0.11559         |                  |                 |              |
| 77 -> 81         |           | -0.14561         |                  |                 |              |
| 77 -> 82         |           | -0.12584         |                  |                 |              |
| Excited State 9: | Singlet-A | 4.2792 eV        | 289.73 nm        | f=0.4031        | <S**2>=0.000 |
| 73 -> 78         |           | 0.59137          |                  |                 |              |
| 74 -> 78         |           | 0.23452          |                  |                 |              |
| 74 -> 79         |           | 0.13002          |                  |                 |              |
| 76 -> 79         |           | 0.14265          |                  |                 |              |
| 76 -> 80         |           | -0.11590         |                  |                 |              |
| 77 -> 80         |           | 0.10045          |                  |                 |              |
| 77 -> 84         |           | 0.10623          |                  |                 |              |

11 (Toluene)

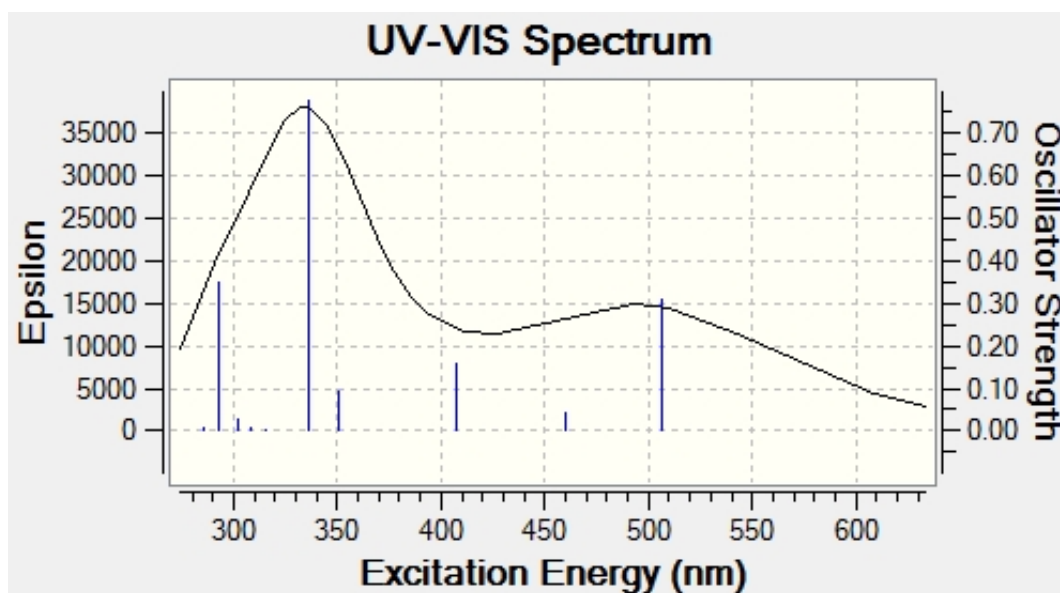

Excited State 1: Singlet-A 2.4493 eV 506.19 nm f=0.3106 <S\*\*2>=0.000  
 76 -> 78 -0.16787  
 77 -> 78 0.67326  
 77 -> 79 -0.11337

Excited State 2: Singlet-A 2.6926 eV 460.46 nm f=0.0440 <S\*\*2>=0.000  
 76 -> 78 0.12029  
 77 -> 78 0.13982  
 77 -> 79 0.67678

Excited State 3: Singlet-A 3.0439 eV 407.32 nm f=0.1590 <S\*\*2>=0.000  
 76 -> 78 0.65199  
 77 -> 78 0.13069  
 77 -> 79 -0.14578  
 77 -> 80 0.14956

Excited State 4: Singlet-A 3.5360 eV 350.63 nm f=0.0941 <S\*\*2>=0.000  
 72 -> 78 0.12663  
 76 -> 79 0.68070

Excited State 5: Singlet-A 3.6903 eV 335.97 nm f=0.7762 <S\*\*2>=0.000  
 76 -> 78 -0.13871  
 77 -> 80 0.67377

Excited State 6: Singlet-A 3.9238 eV 315.98 nm f=0.0001 <S\*\*2>=0.000  
 73 -> 78 0.70072

Excited State 7: Singlet-A 4.0272 eV 307.87 nm f=0.0054 <S\*\*2>=0.000  
 75 -> 78 0.67157  
 77 -> 81 -0.12232  
 77 -> 83 0.13660

Excited State 8: Singlet-A 4.1075 eV 301.85 nm f=0.0281 <S\*\*2>=0.000  
 72 -> 78 0.10399  
 74 -> 78 0.66353  
 77 -> 81 0.13730

Excited State 9: Singlet-A 4.2377 eV 292.57 nm f=0.3490 <S\*\*2>=0.000  
 72 -> 78 0.63417  
 74 -> 79 0.16214  
 76 -> 79 -0.11615  
 77 -> 84 -0.12789

11 (MeCN)

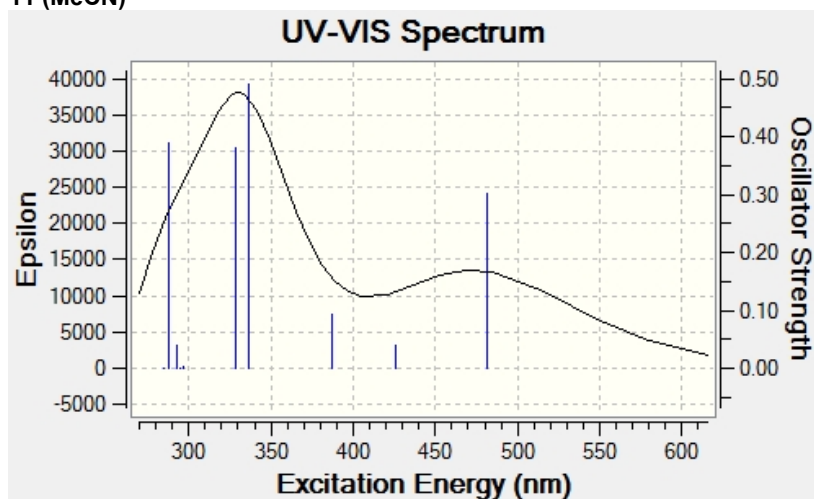

Excited State 1: Singlet-A 2.5754 eV 481.41 nm f=0.3026 <S\*\*2>=0.000  
 76 -> 78 -0.14179  
 77 -> 78 0.68057

Excited State 2: Singlet-A 2.9094 eV 426.15 nm f=0.0395 <S\*\*2>=0.000  
 76 -> 78 0.15311  
 77 -> 78 0.12465  
 77 -> 79 0.67214

Excited State 3: Singlet-A 3.2034 eV 387.04 nm f=0.0942 <S\*\*2>=0.000  
 76 -> 78 0.64377  
 77 -> 78 0.10164  
 77 -> 79 -0.16683  
 77 -> 80 0.18018

Excited State 4: Singlet-A 3.6871 eV 336.26 nm f=0.4916 <S\*\*2>=0.000  
 74 -> 78 0.14028  
 76 -> 78 -0.13857  
 76 -> 79 0.22080  
 77 -> 80 0.62896

Excited State 5: Singlet-A 3.7713 eV 328.76 nm f=0.3807 <S\*\*2>=0.000  
 74 -> 78 0.10439  
 76 -> 79 0.63656  
 77 -> 80 -0.23233

Excited State 6: Singlet-A 4.1749 eV 296.97 nm f=0.0027 <S\*\*2>=0.000  
 74 -> 78 0.16223  
 75 -> 78 -0.38188  
 77 -> 81 0.52743  
 77 -> 82 0.16084

Excited State 7: Singlet-A 4.2000 eV 295.20 nm f=0.0000 <S\*\*2>=0.000  
 72 -> 78 0.70502

Excited State 8: Singlet-A 4.2412 eV 292.33 nm f=0.0386 <S\*\*2>=0.000  
 73 -> 78 0.55732  
 74 -> 78 0.24728  
 75 -> 78 0.25123  
 77 -> 81 0.10478  
 77 -> 82 -0.15973

Excited State 9: Singlet-A 4.3046 eV 288.03 nm f=0.3878 <S\*\*2>=0.000  
 73 -> 78 -0.31926  
 74 -> 78 0.48564  
 75 -> 78 0.23526  
 76 -> 79 -0.15047  
 76 -> 80 0.14376  
 77 -> 80 -0.10149  
 77 -> 84 -0.10085

Complex of 11 with 1 molecule of MeOH (MeCN)

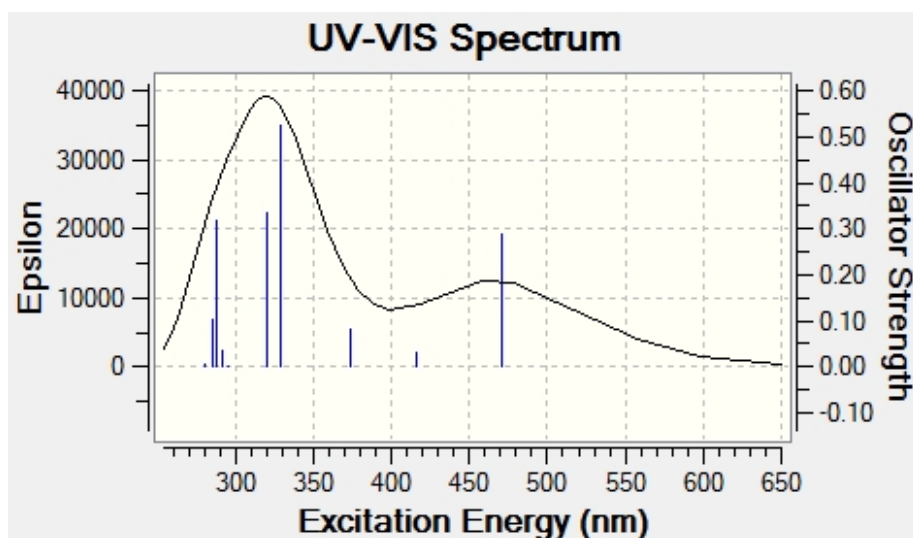

|                  |           |           |           |          |              |
|------------------|-----------|-----------|-----------|----------|--------------|
| Excited State 1: | Singlet-A | 2.6364 eV | 470.27 nm | f=0.2876 | <S**2>=0.000 |
| 85 -> 87         |           | 0.12681   |           |          |              |
| 86 -> 87         |           | 0.68489   |           |          |              |
| Excited State 2: | Singlet-A | 2.9804 eV | 416.00 nm | f=0.0315 | <S**2>=0.000 |
| 85 -> 87         |           | 0.14176   |           |          |              |
| 86 -> 87         |           | -0.10863  |           |          |              |
| 86 -> 88         |           | 0.67720   |           |          |              |
| Excited State 3: | Singlet-A | 3.3219 eV | 373.23 nm | f=0.0816 | <S**2>=0.000 |
| 85 -> 87         |           | 0.64470   |           |          |              |
| 86 -> 88         |           | -0.14783  |           |          |              |
| 86 -> 89         |           | 0.19483   |           |          |              |
| Excited State 4: | Singlet-A | 3.7657 eV | 329.25 nm | f=0.5236 | <S**2>=0.000 |
| 83 -> 87         |           | -0.17843  |           |          |              |
| 85 -> 87         |           | -0.15332  |           |          |              |
| 85 -> 88         |           | -0.18559  |           |          |              |
| 86 -> 89         |           | 0.63100   |           |          |              |
| Excited State 5: | Singlet-A | 3.8707 eV | 320.31 nm | f=0.3329 | <S**2>=0.000 |
| 83 -> 87         |           | 0.17075   |           |          |              |
| 85 -> 88         |           | 0.63175   |           |          |              |
| 86 -> 89         |           | 0.21041   |           |          |              |
| Excited State 6: | Singlet-A | 4.1981 eV | 295.33 nm | f=0.0021 | <S**2>=0.000 |
| 84 -> 87         |           | 0.57796   |           |          |              |
| 86 -> 90         |           | -0.35866  |           |          |              |
| 86 -> 91         |           | -0.13567  |           |          |              |
| Excited State 7: | Singlet-A | 4.2423 eV | 292.25 nm | f=0.0337 | <S**2>=0.000 |
| 82 -> 87         |           | 0.58790   |           |          |              |
| 83 -> 87         |           | -0.28664  |           |          |              |
| 86 -> 90         |           | 0.15870   |           |          |              |
| Excited State 8: | Singlet-A | 4.3134 eV | 287.44 nm | f=0.3171 | <S**2>=0.000 |
| 81 -> 87         |           | -0.14372  |           |          |              |
| 82 -> 87         |           | 0.23125   |           |          |              |
| 83 -> 87         |           | 0.54518   |           |          |              |
| 85 -> 88         |           | -0.18588  |           |          |              |
| 86 -> 90         |           | 0.17261   |           |          |              |
| Excited State 9: | Singlet-A | 4.3381 eV | 285.80 nm | f=0.1042 | <S**2>=0.000 |
| 80 -> 87         |           | -0.10154  |           |          |              |
| 81 -> 87         |           | -0.32641  |           |          |              |
| 82 -> 87         |           | -0.19710  |           |          |              |
| 83 -> 87         |           | -0.12426  |           |          |              |
| 84 -> 87         |           | 0.30674   |           |          |              |
| 86 -> 90         |           | 0.43960   |           |          |              |

Complex of 11 with 2 molecules of MeOH (MeCN)

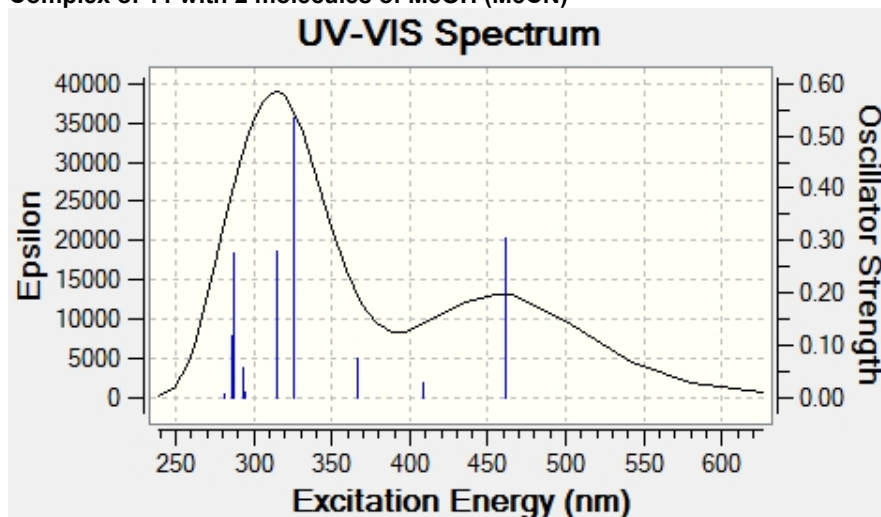

|                  |           |           |           |          |              |
|------------------|-----------|-----------|-----------|----------|--------------|
| Excited State 1: | Singlet-A | 2.6887 eV | 461.13 nm | f=0.3055 | <S**2>=0.000 |
| 94 -> 96         |           | -0.11408  |           |          |              |
| 95 -> 96         |           | 0.68706   |           |          |              |
| Excited State 2: | Singlet-A | 3.0337 eV | 408.69 nm | f=0.0290 | <S**2>=0.000 |
| 94 -> 96         |           | -0.15218  |           |          |              |
| 95 -> 96         |           | -0.10546  |           |          |              |
| 95 -> 97         |           | 0.67479   |           |          |              |
| Excited State 3: | Singlet-A | 3.3789 eV | 366.94 nm | f=0.0757 | <S**2>=0.000 |
| 94 -> 96         |           | 0.64428   |           |          |              |
| 95 -> 97         |           | 0.15499   |           |          |              |
| 95 -> 98         |           | -0.19481  |           |          |              |
| Excited State 4: | Singlet-A | 3.8112 eV | 325.31 nm | f=0.5341 | <S**2>=0.000 |
| 92 -> 96         |           | 0.16320   |           |          |              |
| 94 -> 96         |           | 0.15707   |           |          |              |
| 94 -> 97         |           | 0.14064   |           |          |              |
| 95 -> 98         |           | 0.63939   |           |          |              |
| Excited State 5: | Singlet-A | 3.9335 eV | 315.20 nm | f=0.2800 | <S**2>=0.000 |
| 92 -> 96         |           | 0.19555   |           |          |              |
| 94 -> 97         |           | 0.62946   |           |          |              |
| 95 -> 98         |           | -0.17937  |           |          |              |
| Excited State 6: | Singlet-A | 4.2116 eV | 294.39 nm | f=0.0079 | <S**2>=0.000 |
| 92 -> 96         |           | 0.12790   |           |          |              |
| 93 -> 96         |           | 0.60671   |           |          |              |
| 95 -> 99         |           | 0.26794   |           |          |              |
| 95 -> 100        |           | -0.16134  |           |          |              |
| Excited State 7: | Singlet-A | 4.2328 eV | 292.91 nm | f=0.0552 | <S**2>=0.000 |
| 91 -> 96         |           | 0.48461   |           |          |              |
| 92 -> 96         |           | -0.44904  |           |          |              |
| 94 -> 97         |           | 0.12594   |           |          |              |
| 95 -> 99         |           | -0.10548  |           |          |              |
| Excited State 8: | Singlet-A | 4.3202 eV | 286.99 nm | f=0.2739 | <S**2>=0.000 |
| 90 -> 96         |           | -0.27757  |           |          |              |
| 91 -> 96         |           | 0.41893   |           |          |              |
| 92 -> 96         |           | 0.38679   |           |          |              |
| 94 -> 97         |           | -0.19126  |           |          |              |
| Excited State 9: | Singlet-A | 4.3401 eV | 285.67 nm | f=0.1161 | <S**2>=0.000 |
| 90 -> 96         |           | 0.61898   |           |          |              |
| 91 -> 96         |           | 0.15471   |           |          |              |
| 92 -> 96         |           | 0.15804   |           |          |              |
| 93 -> 96         |           | -0.10235  |           |          |              |
| 94 -> 97         |           | -0.11213  |           |          |              |
| 95 -> 99         |           | 0.13500   |           |          |              |

Complex of 11 with 3 molecules of MeOH (MeCN)

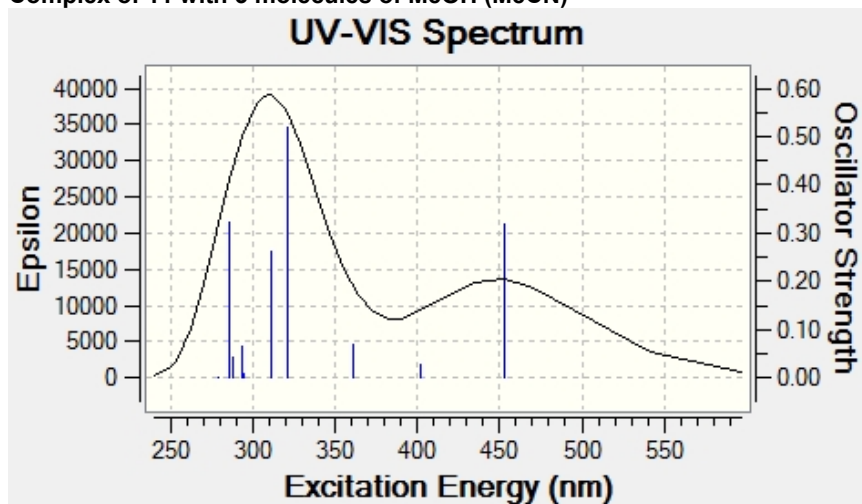

|                  |           |           |           |          |              |
|------------------|-----------|-----------|-----------|----------|--------------|
| Excited State 1: | Singlet-A | 2.7363 eV | 453.10 nm | f=0.3184 | <S**2>=0.000 |
|                  | 103 ->105 | -0.10188  |           |          |              |
|                  | 104 ->105 | 0.68900   |           |          |              |
| Excited State 2: | Singlet-A | 3.0811 eV | 402.40 nm | f=0.0265 | <S**2>=0.000 |
|                  | 103 ->105 | 0.16156   |           |          |              |
|                  | 104 ->105 | 0.10162   |           |          |              |
|                  | 104 ->106 | 0.67260   |           |          |              |
| Excited State 3: | Singlet-A | 3.4328 eV | 361.17 nm | f=0.0704 | <S**2>=0.000 |
|                  | 103 ->105 | 0.64312   |           |          |              |
|                  | 104 ->106 | -0.16096  |           |          |              |
|                  | 104 ->107 | -0.19550  |           |          |              |
| Excited State 4: | Singlet-A | 3.8576 eV | 321.40 nm | f=0.5181 | <S**2>=0.000 |
|                  | 101 ->105 | 0.17185   |           |          |              |
|                  | 103 ->105 | 0.15646   |           |          |              |
|                  | 103 ->106 | -0.11802  |           |          |              |
|                  | 104 ->107 | 0.63928   |           |          |              |
| Excited State 5: | Singlet-A | 3.9894 eV | 310.78 nm | f=0.2624 | <S**2>=0.000 |
|                  | 101 ->105 | -0.23217  |           |          |              |
|                  | 103 ->106 | 0.61479   |           |          |              |
|                  | 104 ->107 | 0.17352   |           |          |              |
| Excited State 6: | Singlet-A | 4.2023 eV | 295.04 nm | f=0.0069 | <S**2>=0.000 |
|                  | 101 ->105 | -0.16720  |           |          |              |
|                  | 102 ->105 | 0.63362   |           |          |              |
|                  | 104 ->108 | -0.18499  |           |          |              |
|                  | 104 ->109 | -0.14842  |           |          |              |
| Excited State 7: | Singlet-A | 4.2235 eV | 293.56 nm | f=0.0663 | <S**2>=0.000 |
|                  | 99 ->105  | 0.17371   |           |          |              |
|                  | 100 ->105 | 0.41382   |           |          |              |
|                  | 101 ->105 | 0.47372   |           |          |              |
|                  | 102 ->105 | 0.11916   |           |          |              |
|                  | 103 ->106 | 0.16284   |           |          |              |
| Excited State 8: | Singlet-A | 4.3014 eV | 288.24 nm | f=0.0427 | <S**2>=0.000 |
|                  | 99 ->105  | 0.46988   |           |          |              |
|                  | 100 ->105 | -0.45235  |           |          |              |
|                  | 101 ->105 | 0.19449   |           |          |              |
|                  | 104 ->108 | -0.10848  |           |          |              |
| Excited State 9: | Singlet-A | 4.3341 eV | 286.07 nm | f=0.3211 | <S**2>=0.000 |
|                  | 99 ->105  | 0.46503   |           |          |              |
|                  | 100 ->105 | 0.26068   |           |          |              |
|                  | 101 ->105 | -0.30195  |           |          |              |
|                  | 101 ->106 | -0.12065  |           |          |              |
|                  | 103 ->106 | -0.23186  |           |          |              |
|                  | 104 ->107 | 0.11188   |           |          |              |



Complex of 11 with 4 molecules of MeOH (MeCN)

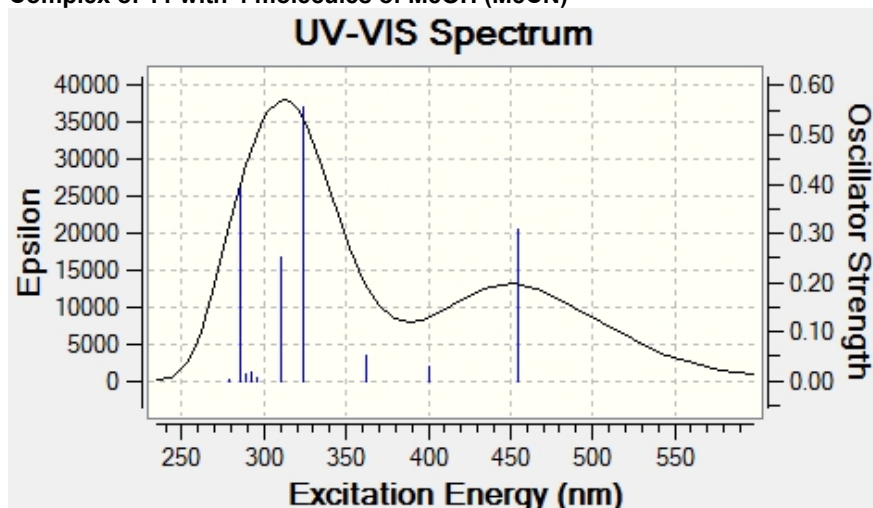

|                  |           |           |           |          |              |
|------------------|-----------|-----------|-----------|----------|--------------|
| Excited State 1: | Singlet-A | 2.7284 eV | 454.42 nm | f=0.3093 | <S**2>=0.000 |
|                  | 112 ->114 | -0.10083  |           |          |              |
|                  | 113 ->114 | 0.68841   |           |          |              |
| Excited State 2: | Singlet-A | 3.0916 eV | 401.04 nm | f=0.0305 | <S**2>=0.000 |
|                  | 112 ->114 | 0.16032   |           |          |              |
|                  | 113 ->114 | 0.10674   |           |          |              |
|                  | 113 ->115 | 0.67207   |           |          |              |
| Excited State 3: | Singlet-A | 3.4223 eV | 362.29 nm | f=0.0513 | <S**2>=0.000 |
|                  | 112 ->114 | 0.63846   |           |          |              |
|                  | 113 ->115 | -0.15970  |           |          |              |
|                  | 113 ->116 | -0.21656  |           |          |              |
| Excited State 4: | Singlet-A | 3.8262 eV | 324.04 nm | f=0.5554 | <S**2>=0.000 |
|                  | 110 ->114 | 0.17199   |           |          |              |
|                  | 112 ->114 | 0.18171   |           |          |              |
|                  | 112 ->115 | -0.10746  |           |          |              |
|                  | 113 ->116 | 0.64162   |           |          |              |
| Excited State 5: | Singlet-A | 4.0000 eV | 309.96 nm | f=0.2529 | <S**2>=0.000 |
|                  | 110 ->114 | -0.23447  |           |          |              |
|                  | 112 ->115 | 0.62484   |           |          |              |
|                  | 113 ->116 | 0.15030   |           |          |              |
| Excited State 6: | Singlet-A | 4.1881 eV | 296.04 nm | f=0.0079 | <S**2>=0.000 |
|                  | 111 ->114 | 0.65908   |           |          |              |
|                  | 113 ->117 | -0.14799  |           |          |              |
|                  | 113 ->118 | -0.15586  |           |          |              |
| Excited State 7: | Singlet-A | 4.2452 eV | 292.06 nm | f=0.0182 | <S**2>=0.000 |
|                  | 108 ->114 | -0.18482  |           |          |              |
|                  | 109 ->114 | 0.56519   |           |          |              |
|                  | 110 ->114 | -0.30899  |           |          |              |
|                  | 113 ->117 | -0.11487  |           |          |              |
| Excited State 8: | Singlet-A | 4.2989 eV | 288.41 nm | f=0.0129 | <S**2>=0.000 |
|                  | 108 ->114 | 0.61359   |           |          |              |
|                  | 109 ->114 | 0.29132   |           |          |              |
|                  | 110 ->114 | 0.16036   |           |          |              |
| Excited State 9: | Singlet-A | 4.3361 eV | 285.94 nm | f=0.3930 | <S**2>=0.000 |
|                  | 108 ->114 | -0.26891  |           |          |              |
|                  | 109 ->114 | 0.20355   |           |          |              |
|                  | 110 ->114 | 0.50222   |           |          |              |
|                  | 110 ->115 | 0.10202   |           |          |              |
|                  | 112 ->115 | 0.26329   |           |          |              |
|                  | 113 ->116 | -0.10516  |           |          |              |



Complex of 11 with 5 molecules of MeOH (MeCN)

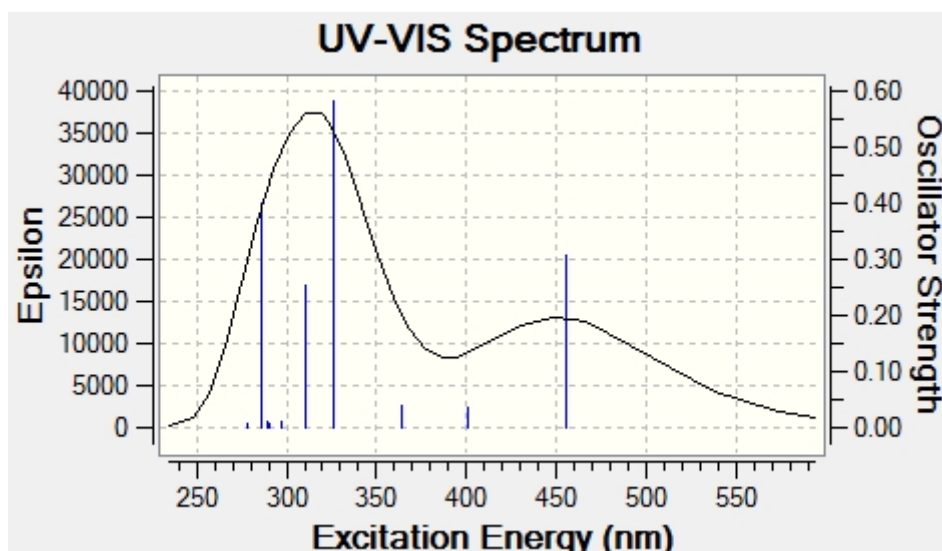

|                  |           |           |           |          |              |
|------------------|-----------|-----------|-----------|----------|--------------|
| Excited State 1: | Singlet-A | 2.7238 eV | 455.19 nm | f=0.3044 | <S**2>=0.000 |
| 122 ->123        | 0.68791   |           |           |          |              |
| Excited State 2: | Singlet-A | 3.0940 eV | 400.73 nm | f=0.0338 | <S**2>=0.000 |
| 121 ->123        | -0.16195  |           |           |          |              |
| 122 ->123        | 0.11131   |           |           |          |              |
| 122 ->124        | 0.67089   |           |           |          |              |
| Excited State 3: | Singlet-A | 3.4100 eV | 363.58 nm | f=0.0382 | <S**2>=0.000 |
| 121 ->123        | 0.63297   |           |           |          |              |
| 122 ->124        | 0.16124   |           |           |          |              |
| 122 ->125        | 0.23462   |           |           |          |              |
| Excited State 4: | Singlet-A | 3.7971 eV | 326.53 nm | f=0.5828 | <S**2>=0.000 |
| 119 ->123        | -0.17218  |           |           |          |              |
| 121 ->123        | -0.20165  |           |           |          |              |
| 121 ->124        | 0.10205   |           |           |          |              |
| 122 ->125        | 0.63946   |           |           |          |              |
| Excited State 5: | Singlet-A | 3.9995 eV | 310.00 nm | f=0.2531 | <S**2>=0.000 |
| 119 ->123        | -0.23539  |           |           |          |              |
| 121 ->124        | 0.63046   |           |           |          |              |
| 122 ->125        | -0.13783  |           |           |          |              |
| Excited State 6: | Singlet-A | 4.1740 eV | 297.04 nm | f=0.0078 | <S**2>=0.000 |
| 120 ->123        | 0.66678   |           |           |          |              |
| 122 ->126        | -0.11350  |           |           |          |              |
| 122 ->127        | -0.15762  |           |           |          |              |
| Excited State 7: | Singlet-A | 4.2625 eV | 290.87 nm | f=0.0049 | <S**2>=0.000 |
| 117 ->123        | 0.53199   |           |           |          |              |
| 118 ->123        | 0.40005   |           |           |          |              |
| 122 ->126        | -0.15175  |           |           |          |              |
| Excited State 8: | Singlet-A | 4.2894 eV | 289.05 nm | f=0.0100 | <S**2>=0.000 |
| 117 ->123        | -0.39677  |           |           |          |              |
| 118 ->123        | 0.52621   |           |           |          |              |
| 119 ->123        | -0.22724  |           |           |          |              |
| Excited State 9: | Singlet-A | 4.3361 eV | 285.93 nm | f=0.4000 | <S**2>=0.000 |
| 117 ->123        | -0.10366  |           |           |          |              |
| 118 ->123        | 0.20171   |           |           |          |              |
| 119 ->123        | 0.56495   |           |           |          |              |
| 121 ->124        | 0.26316   |           |           |          |              |

Complex of 11 with formic acid (MeCN)

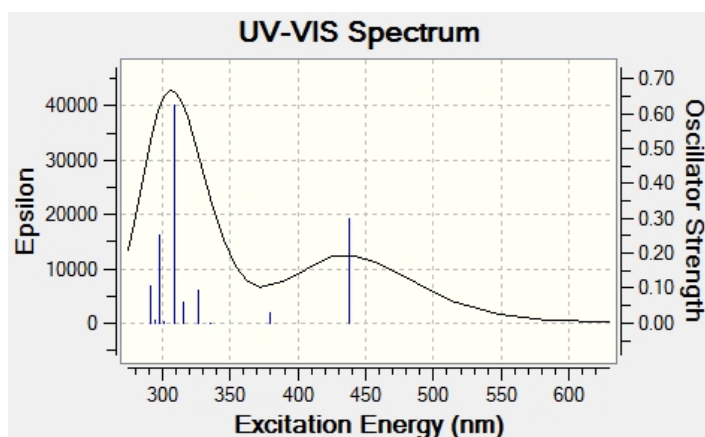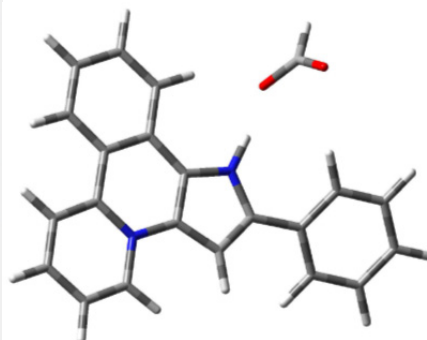

|                  |           |           |           |          |              |
|------------------|-----------|-----------|-----------|----------|--------------|
| Excited State 1: | Singlet-A | 2.8343 eV | 437.45 nm | f=0.2999 | <S**2>=0.000 |
| 89 -> 90         | 0.69788   |           |           |          |              |
| Excited State 2: | Singlet-A | 3.2638 eV | 379.87 nm | f=0.0286 | <S**2>=0.000 |
| 86 -> 90         | -0.12950  |           |           |          |              |
| 89 -> 91         | 0.68312   |           |           |          |              |
| Excited State 3: | Singlet-A | 3.6959 eV | 335.47 nm | f=0.0000 | <S**2>=0.000 |
| 88 -> 90         | 0.70508   |           |           |          |              |
| Excited State 4: | Singlet-A | 3.7929 eV | 326.88 nm | f=0.0932 | <S**2>=0.000 |
| 85 -> 90         | -0.12130  |           |           |          |              |
| 86 -> 90         | 0.34737   |           |           |          |              |
| 87 -> 90         | 0.22343   |           |           |          |              |
| 89 -> 92         | 0.53805   |           |           |          |              |
| Excited State 5: | Singlet-A | 3.9253 eV | 315.86 nm | f=0.0591 | <S**2>=0.000 |
| 86 -> 90         | -0.16651  |           |           |          |              |
| 87 -> 90         | 0.66074   |           |           |          |              |
| 89 -> 92         | -0.17390  |           |           |          |              |
| Excited State 6: | Singlet-A | 4.0064 eV | 309.46 nm | f=0.6252 | <S**2>=0.000 |
| 82 -> 90         | -0.21130  |           |           |          |              |
| 83 -> 90         | -0.21217  |           |           |          |              |
| 84 -> 90         | -0.10872  |           |           |          |              |
| 86 -> 90         | 0.45985   |           |           |          |              |
| 89 -> 92         | -0.38527  |           |           |          |              |
| 89 -> 93         | 0.10174   |           |           |          |              |
| Excited State 7: | Singlet-A | 4.1088 eV | 301.75 nm | f=0.0032 | <S**2>=0.000 |
| 84 -> 90         | 0.14792   |           |           |          |              |
| 85 -> 90         | 0.65628   |           |           |          |              |
| 86 -> 90         | 0.18708   |           |           |          |              |
| Excited State 8: | Singlet-A | 4.1586 eV | 298.14 nm | f=0.2507 | <S**2>=0.000 |
| 82 -> 90         | 0.37548   |           |           |          |              |
| 83 -> 90         | 0.14066   |           |           |          |              |
| 84 -> 90         | 0.39747   |           |           |          |              |
| 85 -> 90         | -0.14696  |           |           |          |              |
| 85 -> 91         | 0.10265   |           |           |          |              |
| 86 -> 90         | 0.18777   |           |           |          |              |
| 86 -> 91         | -0.24170  |           |           |          |              |
| 89 -> 91         | 0.10208   |           |           |          |              |
| 89 -> 92         | -0.12686  |           |           |          |              |
| Excited State 9: | Singlet-A | 4.2124 eV | 294.33 nm | f=0.0082 | <S**2>=0.000 |
| 82 -> 90         | -0.33379  |           |           |          |              |
| 83 -> 90         | -0.21967  |           |           |          |              |
| 84 -> 90         | 0.53893   |           |           |          |              |
| 86 -> 90         | -0.13241  |           |           |          |              |
| 86 -> 91         | 0.10998   |           |           |          |              |

11 (MeOH)

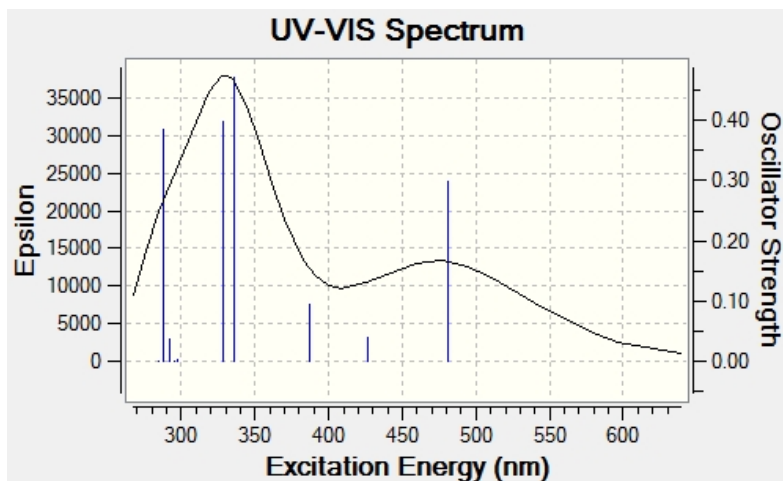

Excited State 1: Singlet-A 2.5758 eV 481.34 nm f=0.2991 <S\*\*2>=0.000  
 76 -> 78 -0.14319  
 77 -> 78 0.68007

Excited State 2: Singlet-A 2.9077 eV 426.40 nm f=0.0394 <S\*\*2>=0.000  
 76 -> 78 0.15242  
 77 -> 78 0.12583  
 77 -> 79 0.67203

Excited State 3: Singlet-A 3.2024 eV 387.16 nm f=0.0936 <S\*\*2>=0.000  
 76 -> 78 0.64345  
 77 -> 78 0.10255  
 77 -> 79 -0.16653  
 77 -> 80 0.18082

Excited State 4: Singlet-A 3.6887 eV 336.12 nm f=0.4711 <S\*\*2>=0.000  
 74 -> 78 0.14472  
 76 -> 78 -0.13662  
 76 -> 79 0.23482  
 77 -> 80 0.62336

Excited State 5: Singlet-A 3.7705 eV 328.82 nm f=0.3975 <S\*\*2>=0.000  
 74 -> 78 0.10223  
 76 -> 79 0.63149  
 77 -> 80 -0.24590

Excited State 6: Singlet-A 4.1748 eV 296.98 nm f=0.0027 <S\*\*2>=0.000  
 74 -> 78 0.15592  
 75 -> 78 -0.38931  
 77 -> 81 0.52367  
 77 -> 82 0.16187

Excited State 7: Singlet-A 4.1972 eV 295.40 nm f=0.0000 <S\*\*2>=0.000  
 72 -> 78 0.70503

Excited State 8: Singlet-A 4.2403 eV 292.39 nm f=0.0365 <S\*\*2>=0.000  
 73 -> 78 0.56063  
 74 -> 78 0.24798  
 75 -> 78 0.24305  
 77 -> 81 0.10555  
 77 -> 82 -0.15953

Excited State 9: Singlet-A 4.3060 eV 287.94 nm f=0.3846 <S\*\*2>=0.000  
 73 -> 78 -0.31311  
 74 -> 78 0.49299  
 75 -> 78 0.22573  
 76 -> 79 -0.15078  
 76 -> 80 0.14381  
 77 -> 80 -0.10230  
 77 -> 84 -0.10289

Complex of 11 with 1 molecule of MeOH (MeOH)

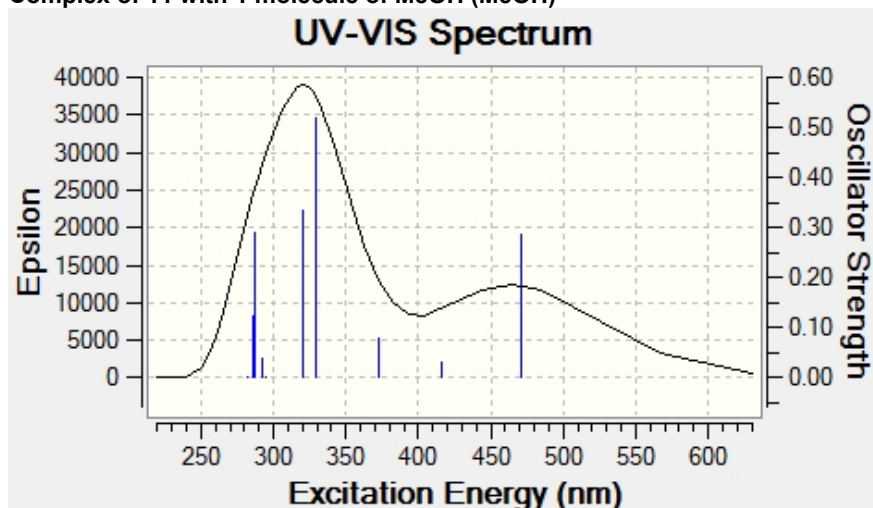

|                  |           |           |           |          |              |
|------------------|-----------|-----------|-----------|----------|--------------|
| Excited State 1: | Singlet-A | 2.6359 eV | 470.37 nm | f=0.2862 | <S**2>=0.000 |
|                  | 85 -> 87  | 0.12745   |           |          |              |
|                  | 86 -> 87  | 0.68467   |           |          |              |
| Excited State 2: | Singlet-A | 2.9767 eV | 416.52 nm | f=0.0310 | <S**2>=0.000 |
|                  | 85 -> 87  | 0.14095   |           |          |              |
|                  | 86 -> 87  | -0.10897  |           |          |              |
|                  | 86 -> 88  | 0.67729   |           |          |              |
| Excited State 3: | Singlet-A | 3.3215 eV | 373.28 nm | f=0.0808 | <S**2>=0.000 |
|                  | 85 -> 87  | 0.64436   |           |          |              |
|                  | 86 -> 88  | -0.14709  |           |          |              |
|                  | 86 -> 89  | 0.19602   |           |          |              |
| Excited State 4: | Singlet-A | 3.7648 eV | 329.32 nm | f=0.5185 | <S**2>=0.000 |
|                  | 83 -> 87  | -0.17570  |           |          |              |
|                  | 85 -> 87  | -0.15377  |           |          |              |
|                  | 85 -> 88  | -0.18786  |           |          |              |
|                  | 86 -> 89  | 0.62980   |           |          |              |
| Excited State 5: | Singlet-A | 3.8694 eV | 320.42 nm | f=0.3336 | <S**2>=0.000 |
|                  | 83 -> 87  | 0.16831   |           |          |              |
|                  | 85 -> 88  | 0.63096   |           |          |              |
|                  | 86 -> 89  | 0.21243   |           |          |              |
| Excited State 6: | Singlet-A | 4.2015 eV | 295.10 nm | f=0.0022 | <S**2>=0.000 |
|                  | 84 -> 87  | 0.56049   |           |          |              |
|                  | 86 -> 90  | -0.38010  |           |          |              |
|                  | 86 -> 91  | -0.13657  |           |          |              |
| Excited State 7: | Singlet-A | 4.2417 eV | 292.30 nm | f=0.0376 | <S**2>=0.000 |
|                  | 82 -> 87  | 0.57532   |           |          |              |
|                  | 83 -> 87  | -0.31895  |           |          |              |
|                  | 84 -> 87  | 0.10882   |           |          |              |
|                  | 86 -> 90  | 0.11742   |           |          |              |
|                  | 86 -> 91  | -0.11247  |           |          |              |
| Excited State 8: | Singlet-A | 4.3141 eV | 287.39 nm | f=0.2886 | <S**2>=0.000 |
|                  | 81 -> 87  | -0.18647  |           |          |              |
|                  | 82 -> 87  | 0.26776   |           |          |              |
|                  | 83 -> 87  | 0.52118   |           |          |              |
|                  | 85 -> 88  | -0.17700  |           |          |              |
|                  | 86 -> 90  | 0.17022   |           |          |              |
| Excited State 9: | Singlet-A | 4.3371 eV | 285.87 nm | f=0.1242 | <S**2>=0.000 |
|                  | 81 -> 87  | -0.37813  |           |          |              |
|                  | 82 -> 87  | -0.18678  |           |          |              |
|                  | 83 -> 87  | -0.13753  |           |          |              |
|                  | 84 -> 87  | 0.30649   |           |          |              |
|                  | 86 -> 90  | 0.40007   |           |          |              |

Complex of 11 with 2 molecules of MeOH (MeOH)

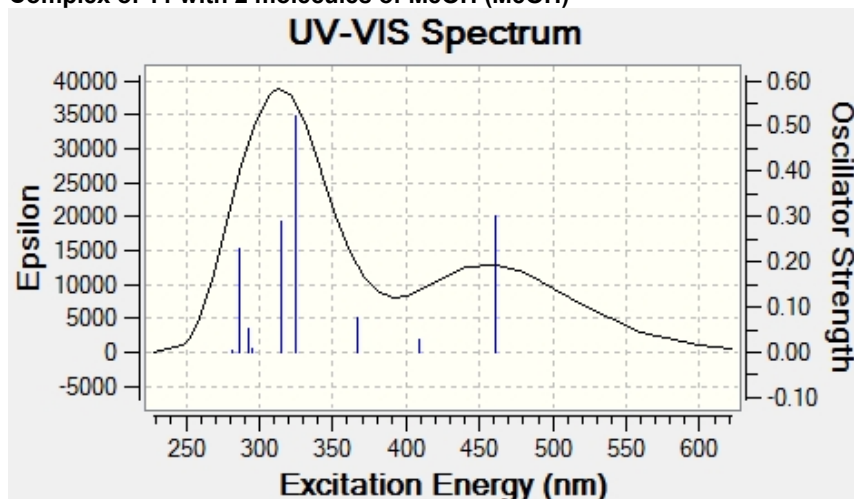

Excited State 1: Singlet-A 2.6891 eV 461.06 nm f=0.3023 <S\*\*2>=0.000  
 94 -> 96 -0.11511  
 95 -> 96 0.68674

Excited State 2: Singlet-A 3.0322 eV 408.90 nm f=0.0288 <S\*\*2>=0.000  
 94 -> 96 -0.15184  
 95 -> 96 -0.10628  
 95 -> 97 0.67469

Excited State 3: Singlet-A 3.3779 eV 367.04 nm f=0.0752 <S\*\*2>=0.000  
 94 -> 96 0.64406  
 95 -> 97 0.15486  
 95 -> 98 -0.19524

Excited State 4: Singlet-A 3.8130 eV 325.16 nm f=0.5226 <S\*\*2>=0.000  
 92 -> 96 0.16592  
 94 -> 96 0.15619  
 94 -> 97 0.14774  
 95 -> 98 0.63701

Excited State 5: Singlet-A 3.9327 eV 315.27 nm f=0.2871 <S\*\*2>=0.000  
 92 -> 96 0.19328  
 94 -> 97 0.62818  
 95 -> 98 -0.18633

Excited State 6: Singlet-A 4.2100 eV 294.50 nm f=0.0075 <S\*\*2>=0.000  
 92 -> 96 0.12372  
 93 -> 96 0.61001  
 95 -> 99 0.26348  
 95 -> 100 -0.16051

Excited State 7: Singlet-A 4.2319 eV 292.97 nm f=0.0524 <S\*\*2>=0.000  
 91 -> 96 0.48679  
 92 -> 96 -0.44799  
 94 -> 97 0.12318  
 95 -> 99 -0.10396

Excited State 8: Singlet-A 4.3198 eV 287.01 nm f=0.2285 <S\*\*2>=0.000  
 90 -> 96 -0.34837  
 91 -> 96 0.39726  
 92 -> 96 0.36646  
 94 -> 97 -0.17667

Excited State 9: Singlet-A 4.3379 eV 285.81 nm f=0.1593 <S\*\*2>=0.000  
 90 -> 96 0.58493  
 91 -> 96 0.19769  
 92 -> 96 0.20654  
 93 -> 96 -0.10044  
 94 -> 97 -0.13439  
 95 -> 99 0.11780

Complex of 11 with 3 molecules of MeOH (MeOH)

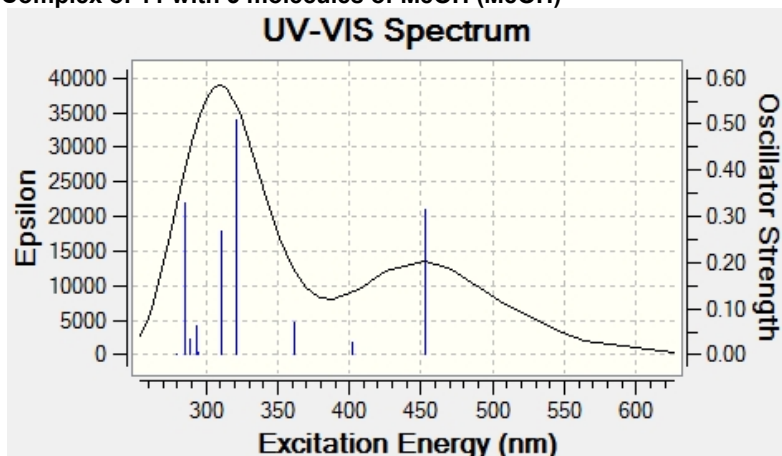

|                  |           |           |           |          |              |
|------------------|-----------|-----------|-----------|----------|--------------|
| Excited State 1: | Singlet-A | 2.7370 eV | 453.00 nm | f=0.3153 | <S**2>=0.000 |
| 103 ->105        |           | -0.10284  |           |          |              |
| 104 ->105        |           | 0.68872   |           |          |              |
| Excited State 2: | Singlet-A | 3.0796 eV | 402.60 nm | f=0.0263 | <S**2>=0.000 |
| 103 ->105        |           | 0.16134   |           |          |              |
| 104 ->105        |           | 0.10239   |           |          |              |
| 104 ->106        |           | 0.67249   |           |          |              |
| Excited State 3: | Singlet-A | 3.4318 eV | 361.28 nm | f=0.0701 | <S**2>=0.000 |
| 103 ->105        |           | 0.64296   |           |          |              |
| 104 ->106        |           | -0.16092  |           |          |              |
| 104 ->107        |           | -0.19572  |           |          |              |
| Excited State 4: | Singlet-A | 3.8595 eV | 321.24 nm | f=0.5077 | <S**2>=0.000 |
| 101 ->105        |           | 0.17421   |           |          |              |
| 103 ->105        |           | 0.15553   |           |          |              |
| 103 ->106        |           | -0.12399  |           |          |              |
| 104 ->107        |           | 0.63726   |           |          |              |
| Excited State 5: | Singlet-A | 3.9885 eV | 310.85 nm | f=0.2677 | <S**2>=0.000 |
| 101 ->105        |           | -0.22916  |           |          |              |
| 103 ->106        |           | 0.61439   |           |          |              |
| 104 ->107        |           | 0.17942   |           |          |              |
| Excited State 6: | Singlet-A | 4.2004 eV | 295.17 nm | f=0.0066 | <S**2>=0.000 |
| 101 ->105        |           | -0.16288  |           |          |              |
| 102 ->105        |           | 0.63605   |           |          |              |
| 104 ->108        |           | -0.18151  |           |          |              |
| 104 ->109        |           | -0.14737  |           |          |              |
| Excited State 7: | Singlet-A | 4.2225 eV | 293.63 nm | f=0.0634 | <S**2>=0.000 |
| 99 ->105         |           | 0.21489   |           |          |              |
| 100 ->105        |           | -0.39597  |           |          |              |
| 101 ->105        |           | 0.47397   |           |          |              |
| 102 ->105        |           | 0.11544   |           |          |              |
| 103 ->106        |           | 0.15970   |           |          |              |
| Excited State 8: | Singlet-A | 4.2978 eV | 288.48 nm | f=0.0323 | <S**2>=0.000 |
| 99 ->105         |           | 0.44215   |           |          |              |
| 100 ->105        |           | 0.48782   |           |          |              |
| 101 ->105        |           | 0.18325   |           |          |              |
| 104 ->108        |           | -0.10808  |           |          |              |
| Excited State 9: | Singlet-A | 4.3345 eV | 286.04 nm | f=0.3297 | <S**2>=0.000 |
| 99 ->105         |           | 0.47004   |           |          |              |
| 100 ->105        |           | -0.23081  |           |          |              |
| 101 ->105        |           | -0.31161  |           |          |              |
| 101 ->106        |           | -0.12435  |           |          |              |
| 103 ->106        |           | -0.23582  |           |          |              |
| 104 ->107        |           | 0.11516   |           |          |              |

Complex of 11 with 4 molecules of MeOH (MeOH)

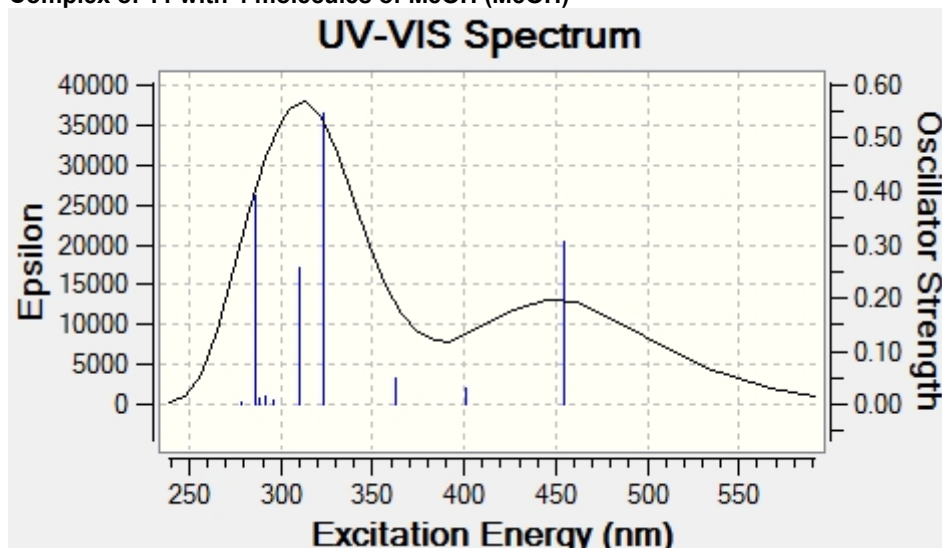

|                  |           |           |           |          |              |
|------------------|-----------|-----------|-----------|----------|--------------|
| Excited State 1: | Singlet-A | 2.7284 eV | 454.42 nm | f=0.3093 | <S**2>=0.000 |
|                  | 112 ->114 | -0.10083  |           |          |              |
|                  | 113 ->114 | 0.68841   |           |          |              |
| Excited State 2: | Singlet-A | 3.0916 eV | 401.04 nm | f=0.0305 | <S**2>=0.000 |
|                  | 112 ->114 | 0.16032   |           |          |              |
|                  | 113 ->114 | 0.10674   |           |          |              |
|                  | 113 ->115 | 0.67207   |           |          |              |
| Excited State 3: | Singlet-A | 3.4223 eV | 362.29 nm | f=0.0513 | <S**2>=0.000 |
|                  | 112 ->114 | 0.63846   |           |          |              |
|                  | 113 ->115 | -0.15970  |           |          |              |
|                  | 113 ->116 | -0.21656  |           |          |              |
| Excited State 4: | Singlet-A | 3.8262 eV | 324.04 nm | f=0.5554 | <S**2>=0.000 |
|                  | 110 ->114 | 0.17199   |           |          |              |
|                  | 112 ->114 | 0.18171   |           |          |              |
|                  | 112 ->115 | -0.10746  |           |          |              |
|                  | 113 ->116 | 0.64162   |           |          |              |
| Excited State 5: | Singlet-A | 4.0000 eV | 309.96 nm | f=0.2529 | <S**2>=0.000 |
|                  | 110 ->114 | -0.23447  |           |          |              |
|                  | 112 ->115 | 0.62484   |           |          |              |
|                  | 113 ->116 | 0.15030   |           |          |              |
| Excited State 6: | Singlet-A | 4.1881 eV | 296.04 nm | f=0.0079 | <S**2>=0.000 |
|                  | 111 ->114 | 0.65908   |           |          |              |
|                  | 113 ->117 | -0.14799  |           |          |              |
|                  | 113 ->118 | -0.15586  |           |          |              |
| Excited State 7: | Singlet-A | 4.2452 eV | 292.06 nm | f=0.0182 | <S**2>=0.000 |
|                  | 108 ->114 | -0.18482  |           |          |              |
|                  | 109 ->114 | 0.56519   |           |          |              |
|                  | 110 ->114 | -0.30899  |           |          |              |
|                  | 113 ->117 | -0.11487  |           |          |              |
| Excited State 8: | Singlet-A | 4.2989 eV | 288.41 nm | f=0.0129 | <S**2>=0.000 |
|                  | 108 ->114 | 0.61359   |           |          |              |
|                  | 109 ->114 | 0.29132   |           |          |              |
|                  | 110 ->114 | 0.16036   |           |          |              |
| Excited State 9: | Singlet-A | 4.3361 eV | 285.94 nm | f=0.3930 | <S**2>=0.000 |
|                  | 108 ->114 | -0.26891  |           |          |              |
|                  | 109 ->114 | 0.20355   |           |          |              |
|                  | 110 ->114 | 0.50222   |           |          |              |
|                  | 110 ->115 | 0.10202   |           |          |              |
|                  | 112 ->115 | 0.26329   |           |          |              |
|                  | 113 ->116 | -0.10516  |           |          |              |

Complex of 11 with 5 molecules of MeOH (MeOH)

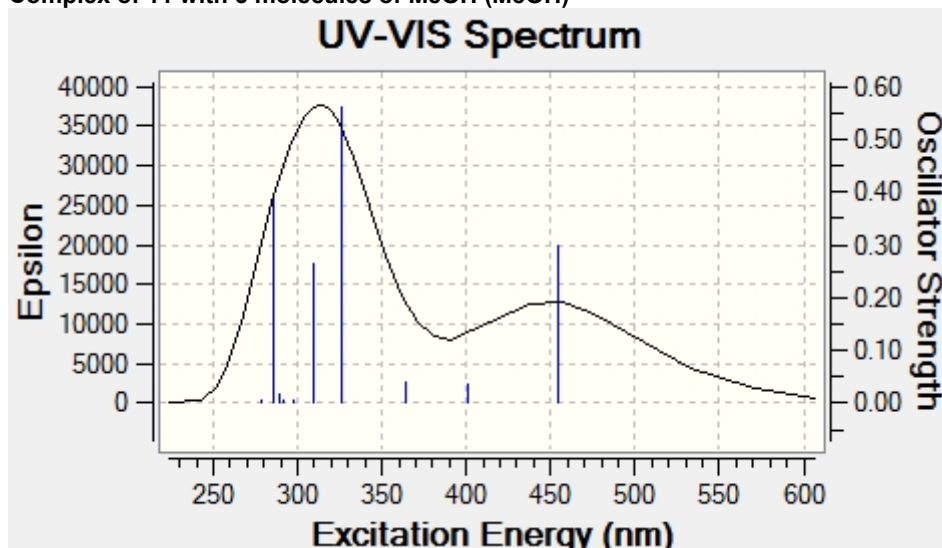

Excited State 1: Singlet-A 2.7269 eV 454.67 nm f=0.2984 <S\*\*2>=0.000  
 121 ->123 0.10154  
 122 ->123 0.68736

Excited State 2: Singlet-A 3.0953 eV 400.56 nm f=0.0339 <S\*\*2>=0.000  
 121 ->123 -0.16231  
 122 ->123 0.11283  
 122 ->124 0.67047

Excited State 3: Singlet-A 3.4104 eV 363.55 nm f=0.0406 <S\*\*2>=0.000  
 121 ->123 0.63411  
 122 ->124 0.16205  
 122 ->125 0.23031

Excited State 4: Singlet-A 3.8085 eV 325.55 nm f=0.5627 <S\*\*2>=0.000  
 119 ->123 -0.17059  
 121 ->123 -0.19558  
 121 ->124 0.11312  
 122 ->125 0.63801

Excited State 5: Singlet-A 3.9991 eV 310.03 nm f=0.2653 <S\*\*2>=0.000  
 119 ->123 -0.22300  
 121 ->124 0.62935  
 122 ->125 -0.14925

Excited State 6: Singlet-A 4.1652 eV 297.67 nm f=0.0060 <S\*\*2>=0.000  
 120 ->123 0.67120  
 122 ->126 -0.10304  
 122 ->127 -0.14474

Excited State 7: Singlet-A 4.2563 eV 291.29 nm f=0.0043 <S\*\*2>=0.000  
 117 ->123 0.37340  
 118 ->123 0.53768  
 119 ->123 -0.13154  
 122 ->126 -0.15089

Excited State 8: Singlet-A 4.2891 eV 289.07 nm f=0.0157 <S\*\*2>=0.000  
 117 ->123 0.53745  
 118 ->123 -0.30540  
 119 ->123 0.30903

Excited State 9: Singlet-A 4.3399 eV 285.68 nm f=0.3944 <S\*\*2>=0.000  
 117 ->123 -0.18111  
 118 ->123 0.27515  
 119 ->123 0.51368  
 121 ->124 0.25951



**Table S33.** B3LYP/6-31G+(d,p) Absolute Energies (au), Cartesian Coordinates of stationary points

| Compound <b>11</b> (gas phase)                                                                                                                         |            |            |            | Compound <b>11</b> (PCM toluene)                                                                                                                       |            |            |            |
|--------------------------------------------------------------------------------------------------------------------------------------------------------|------------|------------|------------|--------------------------------------------------------------------------------------------------------------------------------------------------------|------------|------------|------------|
| <b>E</b> = -918.22282813, <b>H (0K)</b> = -917.931203,<br><b>H (298K)</b> = -917.914961, <b>G (298K)</b> = -917.976036 au.<br>Imaginary frequency = 0. |            |            |            | <b>E</b> = -918.22961087, <b>H (0K)</b> = -917.937949,<br><b>H (298K)</b> = -917.921671, <b>G (298K)</b> = -917.982973 au.<br>Imaginary frequency = 0. |            |            |            |
| C                                                                                                                                                      | -2.7886430 | -3.4683810 | 0.0000590  | C                                                                                                                                                      | -2.7710600 | -3.4747190 | 0.0183400  |
| C                                                                                                                                                      | -1.6027360 | -2.7921720 | -0.0000520 | C                                                                                                                                                      | -1.5885510 | -2.7913020 | 0.0112580  |
| C                                                                                                                                                      | -2.7217110 | -0.6496520 | 0.0000440  | C                                                                                                                                                      | -2.7186580 | -0.6573900 | 0.0041900  |
| C                                                                                                                                                      | -3.9409700 | -1.3640820 | 0.0001860  | C                                                                                                                                                      | -3.9354540 | -1.3760870 | 0.0128000  |
| C                                                                                                                                                      | -0.3043560 | -0.7874810 | -0.0000250 | C                                                                                                                                                      | -0.3018900 | -0.7778940 | 0.0002380  |
| C                                                                                                                                                      | -2.6384720 | 0.7936450  | -0.0000150 | C                                                                                                                                                      | -2.6430730 | 0.7886370  | -0.0043560 |
| C                                                                                                                                                      | -1.3664930 | 1.4498320  | -0.0000370 | C                                                                                                                                                      | -1.3753670 | 1.4525880  | -0.0067920 |
| C                                                                                                                                                      | -0.1997420 | 0.6392610  | -0.0000160 | C                                                                                                                                                      | -0.2038950 | 0.6451900  | -0.0027980 |
| C                                                                                                                                                      | -1.3014040 | 2.8666390  | -0.0000790 | C                                                                                                                                                      | -1.3227740 | 2.8693930  | -0.0138520 |
| H                                                                                                                                                      | -0.3189190 | 3.3259850  | -0.0000920 | H                                                                                                                                                      | -0.3471820 | 3.3428830  | -0.0157090 |
| C                                                                                                                                                      | -2.4540210 | 3.6205440  | -0.0001100 | C                                                                                                                                                      | -2.4820050 | 3.6152660  | -0.0190390 |
| C                                                                                                                                                      | -3.7187930 | 2.9836300  | -0.0001070 | C                                                                                                                                                      | -3.7411520 | 2.9697320  | -0.0179110 |
| C                                                                                                                                                      | -3.8066000 | 1.6072960  | -0.0000600 | C                                                                                                                                                      | -3.8172060 | 1.5917760  | -0.0108000 |
| H                                                                                                                                                      | -2.7759370 | -4.5523010 | 0.0000270  | H                                                                                                                                                      | -2.7529120 | -4.5582700 | 0.0232690  |
| H                                                                                                                                                      | -0.6430550 | -3.2876190 | -0.0001860 | H                                                                                                                                                      | -0.6270130 | -3.2828060 | 0.0105280  |
| H                                                                                                                                                      | -4.8616980 | -0.7971250 | 0.0002890  | H                                                                                                                                                      | -4.8603590 | -0.8164690 | 0.0147770  |
| H                                                                                                                                                      | -2.3968330 | 4.7051940  | -0.0001450 | H                                                                                                                                                      | -2.4318360 | 4.7001950  | -0.0246950 |
| H                                                                                                                                                      | -4.6261620 | 3.5797640  | -0.0001520 | H                                                                                                                                                      | -4.6532120 | 3.5583750  | -0.0231110 |
| H                                                                                                                                                      | -4.7916720 | 1.1557630  | -0.0000820 | H                                                                                                                                                      | -4.7981850 | 1.1322030  | -0.0114090 |
| C                                                                                                                                                      | 1.8188330  | -0.1314420 | -0.0000320 | C                                                                                                                                                      | 1.8208910  | -0.1190480 | -0.0023140 |
| N                                                                                                                                                      | 1.0861770  | 1.0251760  | 0.0000230  | N                                                                                                                                                      | 1.0850040  | 1.0357480  | -0.0033180 |
| N                                                                                                                                                      | -1.5424620 | -1.4099810 | -0.0000110 | N                                                                                                                                                      | -1.5390300 | -1.4103340 | 0.0049650  |
| C                                                                                                                                                      | 3.2875270  | -0.0807160 | -0.0000230 | C                                                                                                                                                      | 3.2908720  | -0.0699700 | -0.0017040 |
| C                                                                                                                                                      | 3.9491530  | 1.1626940  | 0.0004080  | C                                                                                                                                                      | 3.9596010  | 1.1683830  | 0.0615330  |
| C                                                                                                                                                      | 4.0712460  | -1.2505100 | -0.0004320 | C                                                                                                                                                      | 4.0712750  | -1.2411790 | -0.0632880 |
| C                                                                                                                                                      | 5.3415800  | 1.2304580  | 0.0004370  | C                                                                                                                                                      | 5.3529470  | 1.2305970  | 0.0651570  |
| H                                                                                                                                                      | 3.3478640  | 2.0649270  | 0.0007140  | H                                                                                                                                                      | 3.3656690  | 2.0743440  | 0.1082470  |
| C                                                                                                                                                      | 5.4641910  | -1.1810570 | -0.0004030 | C                                                                                                                                                      | 5.4648920  | -1.1777780 | -0.0595720 |
| H                                                                                                                                                      | 3.5908370  | -2.2242860 | -0.0008010 | H                                                                                                                                                      | 3.5872660  | -2.2114620 | -0.1188620 |
| C                                                                                                                                                      | 6.1084320  | 0.0603460  | 0.0000340  | C                                                                                                                                                      | 6.1155790  | 0.0590300  | 0.0051690  |
| H                                                                                                                                                      | 5.8316920  | 2.2004010  | 0.0007800  | H                                                                                                                                                      | 5.8464230  | 2.1975560  | 0.1155860  |
| H                                                                                                                                                      | 6.0480800  | -2.0975190 | -0.0007320 | H                                                                                                                                                      | 6.0441690  | -2.0958520 | -0.1089500 |
| H                                                                                                                                                      | 7.1933950  | 0.1144160  | 0.0000550  | H                                                                                                                                                      | 7.2007090  | 0.1084360  | 0.0078880  |
| C                                                                                                                                                      | 1.0045500  | -1.2892240 | -0.0000070 | C                                                                                                                                                      | 1.0088780  | -1.2776430 | 0.0001310  |
| H                                                                                                                                                      | 1.3363730  | -2.3169210 | 0.0000330  | H                                                                                                                                                      | 1.3408490  | -2.3052290 | 0.0074180  |
| C                                                                                                                                                      | -3.9990370 | -2.7404970 | 0.0002080  | C                                                                                                                                                      | -3.9837340 | -2.7529580 | 0.0197720  |
| H                                                                                                                                                      | -4.9551700 | -3.2518170 | 0.0003390  | H                                                                                                                                                      | -4.9368940 | -3.2695590 | 0.0265250  |
| Compound <b>11</b> (PCM CH <sub>2</sub> Cl <sub>2</sub> )                                                                                              |            |            |            | Compound <b>11</b> (PCM MeCN)                                                                                                                          |            |            |            |
| <b>E</b> = -918.23645305, <b>H (0K)</b> = -917.944674,<br><b>H (298K)</b> = -917.928415, <b>G (298K)</b> = -917.989583 au.<br>Imaginary frequency = 0. |            |            |            | <b>E</b> = -918.23913726, <b>H (0K)</b> = -917.947427,<br><b>H (298K)</b> = -917.932057, <b>G (298K)</b> = -917.990264 au.<br>Imaginary frequency = 0. |            |            |            |
| C                                                                                                                                                      | -2.7581460 | -3.4795840 | 0.0200990  | C                                                                                                                                                      | 2.7525620  | -3.4818790 | -0.0000810 |
| C                                                                                                                                                      | -1.5778710 | -2.7907590 | 0.0126700  | C                                                                                                                                                      | 1.5732120  | -2.7908480 | -0.0000150 |
| C                                                                                                                                                      | -2.7167770 | -0.6639140 | 0.0045960  | C                                                                                                                                                      | 2.7160750  | -0.6666690 | -0.0000250 |
| C                                                                                                                                                      | -3.9314970 | -1.3851420 | 0.0139850  | C                                                                                                                                                      | 3.9297320  | -1.3892870 | -0.0001330 |
| C                                                                                                                                                      | -0.3002660 | -0.7703580 | 0.0008570  | C                                                                                                                                                      | 0.2997050  | -0.7674370 | 0.0000190  |
| C                                                                                                                                                      | -2.6470980 | 0.7850030  | -0.0049720 | C                                                                                                                                                      | 2.6488510  | 0.7832080  | 0.0000360  |
| C                                                                                                                                                      | -1.3830720 | 1.4548390  | -0.0069050 | C                                                                                                                                                      | 1.3865050  | 1.4556560  | -0.0000040 |
| C                                                                                                                                                      | -0.2077130 | 0.6493120  | -0.0023170 | C                                                                                                                                                      | 0.2090940  | 0.6514530  | -0.0000270 |
| C                                                                                                                                                      | -1.3394590 | 2.8713590  | -0.0144170 | C                                                                                                                                                      | 1.3463010  | 2.8723680  | 0.0000090  |
| H                                                                                                                                                      | -0.3688910 | 3.3552640  | -0.0156540 | H                                                                                                                                                      | 0.3772220  | 3.3594450  | -0.0000310 |
| C                                                                                                                                                      | -2.5038950 | 3.6116760  | -0.0208180 | C                                                                                                                                                      | 2.5126960  | 3.6105710  | 0.0000840  |
| C                                                                                                                                                      | -3.7583330 | 2.9595080  | -0.0207460 | C                                                                                                                                                      | 3.7653480  | 2.9553910  | 0.0001670  |
| C                                                                                                                                                      | -3.8255250 | 1.5799090  | -0.0130760 | C                                                                                                                                                      | 3.8290980  | 1.5751820  | 0.0001460  |
| H                                                                                                                                                      | -2.7356190 | -4.5628190 | 0.0254580  | H                                                                                                                                                      | 2.7280560  | -4.5650300 | -0.0000890 |

|                                                                                                                            |            |            |            |                                                                                                                            |            |            |            |
|----------------------------------------------------------------------------------------------------------------------------|------------|------------|------------|----------------------------------------------------------------------------------------------------------------------------|------------|------------|------------|
| H                                                                                                                          | -0.6151100 | -3.2796500 | 0.0121950  | H                                                                                                                          | 0.6098320  | -3.2785150 | 0.0000150  |
| H                                                                                                                          | -4.8595420 | -0.8311690 | 0.0163420  | H                                                                                                                          | 4.8589480  | -0.8373750 | -0.0002240 |
| H                                                                                                                          | -2.4592140 | 4.6967920  | -0.0267510 | H                                                                                                                          | 2.4707320  | 4.6958010  | 0.0000940  |
| H                                                                                                                          | -4.6740220 | 3.5421950  | -0.0272370 | H                                                                                                                          | 4.6824570  | 3.5358110  | 0.0002600  |
| H                                                                                                                          | -4.8033400 | 1.1143900  | -0.0148290 | H                                                                                                                          | 4.8056840  | 1.1073080  | 0.0002470  |
| C                                                                                                                          | 1.8228600  | -0.1096610 | -0.0017280 | C                                                                                                                          | -1.8236520 | -0.1053640 | 0.0000010  |
| N                                                                                                                          | 1.0836600  | 1.0443010  | -0.0031420 | N                                                                                                                          | -1.0826600 | 1.0485410  | -0.0000370 |
| N                                                                                                                          | -1.5369580 | -1.4110510 | 0.0057550  | N                                                                                                                          | 1.5356160  | -1.4113540 | -0.0000010 |
| C                                                                                                                          | 3.2939000  | -0.0616750 | -0.0014160 | C                                                                                                                          | -3.2949670 | -0.0578970 | 0.0000030  |
| C                                                                                                                          | 3.9688150  | 1.1736820  | 0.0682540  | C                                                                                                                          | -3.9729970 | 1.1784490  | -0.0003100 |
| C                                                                                                                          | 4.0717760  | -1.2352710 | -0.0699470 | C                                                                                                                          | -4.0713310 | -1.2349590 | 0.0003150  |
| C                                                                                                                          | 5.3630230  | 1.2317480  | 0.0711820  | C                                                                                                                          | -5.3675230 | 1.2342050  | -0.0003200 |
| H                                                                                                                          | 3.3816920  | 2.0838270  | 0.1212440  | H                                                                                                                          | -3.3888820 | 2.0921740  | -0.0005530 |
| C                                                                                                                          | 5.4660010  | -1.1762540 | -0.0665690 | C                                                                                                                          | -5.4659160 | -1.1782190 | 0.0003050  |
| H                                                                                                                          | 3.5855770  | -2.2040650 | -0.1305830 | H                                                                                                                          | -3.5839850 | -2.2049970 | 0.0005850  |
| C                                                                                                                          | 6.1220770  | 0.0579230  | 0.0042930  | C                                                                                                                          | -6.1246450 | 0.0568470  | -0.0000130 |
| H                                                                                                                          | 5.8592440  | 2.1970040  | 0.1268000  | H                                                                                                                          | -5.8655850 | 2.2001080  | -0.0005700 |
| H                                                                                                                          | 6.0414990  | -2.0963240 | -0.1212840 | H                                                                                                                          | -6.0394950 | -2.1010700 | 0.0005540  |
| H                                                                                                                          | 7.2072800  | 0.1034640  | 0.0065810  | H                                                                                                                          | -7.2098910 | 0.1004780  | -0.0000210 |
| C                                                                                                                          | 1.0122300  | -1.2684010 | 0.0008750  | C                                                                                                                          | -1.0136470 | -1.2641530 | 0.0000310  |
| H                                                                                                                          | 1.3437910  | -2.2960650 | 0.0080760  | H                                                                                                                          | -1.3452620 | -2.2919050 | 0.0000510  |
| C                                                                                                                          | -3.9722080 | -2.7626960 | 0.0215230  | C                                                                                                                          | 3.9674870  | -2.7671720 | -0.0001560 |
| H                                                                                                                          | -4.9231860 | -3.2830810 | 0.0288060  | H                                                                                                                          | 4.9175420  | -3.2892240 | -0.0002430 |
| Compound 11 (PCM MeOH)                                                                                                     |            |            |            | Compound 11*H <sub>2</sub> O (gas phase)                                                                                   |            |            |            |
| E = -918.23904461, H (0K) = -917.947339,<br>H (298K) = -917.931967, G (298K) = -917.990181 au.<br>Imaginary frequency = 0. |            |            |            | E = -994.67124022, H (0K) = -994.354665,<br>H (298K) = -994.335392, G (298K) = -994.403096 au.<br>Imaginary frequency = 0. |            |            |            |
| C                                                                                                                          | 2.7527550  | -3.4818060 | 0.0000170  | C                                                                                                                          | 3.0343690  | -3.5441200 | -0.0350600 |
| C                                                                                                                          | 1.5733720  | -2.7908540 | 0.0000420  | C                                                                                                                          | 1.8261810  | -2.9089910 | -0.0181860 |
| C                                                                                                                          | 2.7160990  | -0.6665740 | -0.0000040 | C                                                                                                                          | 2.8681450  | -0.7293670 | -0.0234120 |
| C                                                                                                                          | 3.9297950  | -1.3891500 | -0.0000550 | C                                                                                                                          | 4.1126490  | -1.4005230 | -0.0412190 |
| C                                                                                                                          | 0.2997280  | -0.7675430 | 0.0000210  | C                                                                                                                          | 0.4601630  | -0.9506200 | -0.0002780 |
| C                                                                                                                          | 2.6487850  | 0.7832650  | 0.0000060  | C                                                                                                                          | 2.7321000  | 0.7096270  | -0.0146800 |
| C                                                                                                                          | 1.3863850  | 1.4556280  | -0.0000250 | C                                                                                                                          | 1.4378630  | 1.3255570  | 0.0022550  |
| C                                                                                                                          | 0.2090350  | 0.6513890  | -0.0000220 | C                                                                                                                          | 0.3013430  | 0.4669460  | 0.0036160  |
| C                                                                                                                          | 1.3460630  | 2.8723440  | -0.0000430 | C                                                                                                                          | 1.3335400  | 2.7414210  | 0.0120580  |
| H                                                                                                                          | 0.3769240  | 3.3592970  | -0.0000740 | H                                                                                                                          | 0.3491320  | 3.1970810  | 0.0355310  |
| C                                                                                                                          | 2.5123890  | 3.6106210  | -0.0000170 | C                                                                                                                          | 2.4678300  | 3.5242660  | 0.0018250  |
| C                                                                                                                          | 3.7651070  | 2.9555350  | 0.0000390  | C                                                                                                                          | 3.7501550  | 2.9279970  | -0.0166220 |
| C                                                                                                                          | 3.8289740  | 1.5753470  | 0.0000520  | C                                                                                                                          | 3.8767470  | 1.5553650  | -0.0239420 |
| H                                                                                                                          | 2.7283180  | -4.5649620 | 0.0000330  | H                                                                                                                          | 3.0597740  | -4.6277090 | -0.0380450 |
| H                                                                                                                          | 0.6100100  | -3.2785590 | 0.0000710  | H                                                                                                                          | 0.8844930  | -3.4373310 | -0.0069290 |
| H                                                                                                                          | 4.8589660  | -0.8371570 | -0.0001190 | H                                                                                                                          | 5.0134380  | -0.8030580 | -0.0501240 |
| H                                                                                                                          | 2.4703450  | 4.6958480  | -0.0000320 | H                                                                                                                          | 2.3752780  | 4.6063180  | 0.0092620  |
| H                                                                                                                          | 4.6821660  | 3.5360360  | 0.0000790  | H                                                                                                                          | 4.6397240  | 3.5503540  | -0.0245020 |
| H                                                                                                                          | 4.8055990  | 1.1075460  | 0.0001150  | H                                                                                                                          | 4.8737070  | 1.1316750  | -0.0369100 |
| C                                                                                                                          | -1.8236240 | -0.1055090 | 0.0000020  | C                                                                                                                          | -1.6930640 | -0.4010780 | -0.0008550 |
| N                                                                                                                          | -1.0826920 | 1.0484080  | -0.0000340 | N                                                                                                                          | -1.0102810 | 0.7878190  | 0.0021110  |
| N                                                                                                                          | 1.5356540  | -1.4113420 | 0.0000230  | N                                                                                                                          | 1.7201770  | -1.5304470 | -0.0136570 |
| C                                                                                                                          | -3.2949260 | -0.0580280 | 0.0000000  | C                                                                                                                          | -3.1631030 | -0.4449510 | -0.0254730 |
| C                                                                                                                          | -3.9728560 | 1.1783580  | 0.0000220  | C                                                                                                                          | -3.9119290 | 0.6551120  | -0.4854710 |
| C                                                                                                                          | -4.0713350 | -1.2350430 | -0.0000240 | C                                                                                                                          | -3.8584960 | -1.5942830 | 0.3976070  |
| C                                                                                                                          | -5.3673700 | 1.2341890  | 0.0000220  | C                                                                                                                          | -5.3055960 | 0.6017520  | -0.5216130 |
| H                                                                                                                          | -3.3886200 | 2.0920010  | 0.0000400  | H                                                                                                                          | -3.3962940 | 1.5482910  | -0.8200330 |
| C                                                                                                                          | -5.4659120 | -1.1782280 | -0.0000230 | C                                                                                                                          | -5.2514160 | -1.6460910 | 0.3576250  |
| H                                                                                                                          | -3.5840170 | -2.2050960 | -0.0000470 | H                                                                                                                          | -3.3047170 | -2.4462000 | 0.7809930  |
| C                                                                                                                          | -6.1245550 | 0.0568770  | 0.0000000  | C                                                                                                                          | -5.9835700 | -0.5471860 | -0.1029990 |
| H                                                                                                                          | -5.8653800 | 2.2001200  | 0.0000400  | H                                                                                                                          | -5.8632470 | 1.4611120  | -0.8835540 |
| H                                                                                                                          | -6.0395550 | -2.1010400 | -0.0000420 | H                                                                                                                          | -5.7663690 | -2.5415330 | 0.6948140  |
| H                                                                                                                          | -7.2098000 | 0.1005720  | 0.0000000  | H                                                                                                                          | -7.0687540 | -0.5856770 | -0.1327450 |

|                                                                                                                                                            |            |            |            |                                                                                                                                                            |            |            |            |
|------------------------------------------------------------------------------------------------------------------------------------------------------------|------------|------------|------------|------------------------------------------------------------------------------------------------------------------------------------------------------------|------------|------------|------------|
| C                                                                                                                                                          | -1.0135980 | -1.2642940 | 0.0000370  | C                                                                                                                                                          | -0.8253540 | -1.5127050 | 0.0001400  |
| H                                                                                                                                                          | -1.3452160 | -2.2920480 | 0.0000730  | H                                                                                                                                                          | -1.1149960 | -2.5521500 | -0.0397600 |
| C                                                                                                                                                          | 3.9676560  | -2.7670240 | -0.0000430 | C                                                                                                                                                          | 4.2175810  | -2.7736060 | -0.0476980 |
| H                                                                                                                                                          | 4.9177420  | -3.2890220 | -0.0000850 | H                                                                                                                                                          | 5.1910040  | -3.2510800 | -0.0617130 |
|                                                                                                                                                            |            |            |            | O                                                                                                                                                          | -1.9145640 | 3.4498520  | 0.3406610  |
|                                                                                                                                                            |            |            |            | H                                                                                                                                                          | -1.6734590 | 2.4939140  | 0.2583680  |
|                                                                                                                                                            |            |            |            | H                                                                                                                                                          | -2.4083220 | 3.5284560  | 1.1651600  |
| Complex of <b>11</b> with 1 molecule of MeOH (PCM MeCN)                                                                                                    |            |            |            | Complex of <b>11</b> with 2 molecules of MeOH (PCM MeCN)                                                                                                   |            |            |            |
| <b>E</b> = -1033.98948794, <b>H (0K)</b> = -1033.644451,<br><b>H (298K)</b> = -1033.623564, <b>G (298K)</b> = -1033.697242 au.<br>Imaginary frequency = 0. |            |            |            | <b>E</b> = -1149.73329275, <b>H (0K)</b> = -1149.335845,<br><b>H (298K)</b> = -1149.309755, <b>G (298K)</b> = -1149.398458 au.<br>Imaginary frequency = 0. |            |            |            |
| C                                                                                                                                                          | 3.2786830  | -3.5370010 | 0.2986700  | C                                                                                                                                                          | -3.3716490 | -3.3016900 | -0.9937710 |
| C                                                                                                                                                          | 2.0435600  | -2.9578640 | 0.2119400  | C                                                                                                                                                          | -2.1373920 | -2.7267160 | -0.8730860 |
| C                                                                                                                                                          | 2.9944010  | -0.7527930 | -0.0046520 | C                                                                                                                                                          | -3.0927290 | -0.5733150 | -0.3599370 |
| C                                                                                                                                                          | 4.2670880  | -1.3589210 | 0.0860780  | C                                                                                                                                                          | -4.3643690 | -1.1750360 | -0.4850670 |
| C                                                                                                                                                          | 0.5977370  | -1.0688160 | -0.0198530 | C                                                                                                                                                          | -0.6964200 | -0.8681980 | -0.4463710 |
| C                                                                                                                                                          | 2.7977830  | 0.6768990  | -0.1603460 | C                                                                                                                                                          | -2.8981320 | 0.8294950  | -0.0404440 |
| C                                                                                                                                                          | 1.4809560  | 1.2310640  | -0.2401690 | C                                                                                                                                                          | -1.5827120 | 1.3807960  | 0.0717870  |
| C                                                                                                                                                          | 0.3810150  | 0.3245130  | -0.1688830 | C                                                                                                                                                          | -0.4802150 | 0.4962730  | -0.1368650 |
| C                                                                                                                                                          | 1.3195700  | 2.6310740  | -0.3926600 | C                                                                                                                                                          | -1.4246390 | 2.7542920  | 0.3819140  |
| H                                                                                                                                                          | 0.3153000  | 3.0377690  | -0.4432990 | H                                                                                                                                                          | -0.4223570 | 3.1619430  | 0.4569880  |
| C                                                                                                                                                          | 2.4196330  | 3.4625740  | -0.4656980 | C                                                                                                                                                          | -2.5274880 | 3.5627020  | 0.5773520  |
| C                                                                                                                                                          | 3.7234640  | 2.9247820  | -0.3889550 | C                                                                                                                                                          | -3.8295870 | 3.0276530  | 0.4697870  |
| C                                                                                                                                                          | 3.9052650  | 1.5634690  | -0.2392260 | C                                                                                                                                                          | -4.0080020 | 1.6915300  | 0.1670170  |
| H                                                                                                                                                          | 3.3494380  | -4.6116380 | 0.4159820  | H                                                                                                                                                          | -3.4405660 | -4.3541940 | -1.2407580 |
| H                                                                                                                                                          | 1.1270780  | -3.5266720 | 0.2564650  | H                                                                                                                                                          | -1.2200110 | -3.2777710 | -1.0149750 |
| H                                                                                                                                                          | 5.1442600  | -0.7298710 | 0.0377250  | H                                                                                                                                                          | -5.2431100 | -0.5651080 | -0.3327650 |
| H                                                                                                                                                          | 2.2830420  | 4.5336740  | -0.5820370 | H                                                                                                                                                          | -2.3932960 | 4.6140890  | 0.8140260  |
| H                                                                                                                                                          | 4.5871450  | 3.5793660  | -0.4471600 | H                                                                                                                                                          | -4.6949580 | 3.6642520  | 0.6235930  |
| H                                                                                                                                                          | 4.9181900  | 1.1850960  | -0.1840960 | H                                                                                                                                                          | -5.0199070 | 1.3144630  | 0.0907710  |
| C                                                                                                                                                          | -1.5793850 | -0.6271320 | -0.1268410 | C                                                                                                                                                          | 1.4855570  | -0.4258320 | -0.3491950 |
| N                                                                                                                                                          | -0.9491320 | 0.5886630  | -0.2337290 | N                                                                                                                                                          | 0.8518580  | 0.7599240  | -0.0772120 |
| N                                                                                                                                                          | 1.8863700  | -1.5957330 | 0.0623960  | N                                                                                                                                                          | -1.9837130 | -1.3923650 | -0.5604010 |
| C                                                                                                                                                          | -3.0458600 | -0.7457690 | -0.1827900 | C                                                                                                                                                          | 2.9543620  | -0.5414600 | -0.3678630 |
| C                                                                                                                                                          | -3.8336840 | 0.2569590  | -0.7814980 | C                                                                                                                                                          | 3.7704060  | 0.4076180  | 0.2783670  |
| C                                                                                                                                                          | -3.7020160 | -1.8753730 | 0.3471210  | C                                                                                                                                                          | 3.5837990  | -1.6179730 | -1.0254180 |
| C                                                                                                                                                          | -5.2230430 | 0.1350430  | -0.8456010 | C                                                                                                                                                          | 5.1610810  | 0.2834970  | 0.2667000  |
| H                                                                                                                                                          | -3.3478670 | 1.1295060  | -1.2035920 | H                                                                                                                                                          | 3.3099490  | 1.2429800  | 0.7934450  |
| C                                                                                                                                                          | -5.0905520 | -1.9984740 | 0.2782140  | C                                                                                                                                                          | 4.9737190  | -1.7427500 | -1.0328670 |
| H                                                                                                                                                          | -3.1226540 | -2.6558740 | 0.8311650  | H                                                                                                                                                          | 2.9831300  | -2.3556890 | -1.5485430 |
| C                                                                                                                                                          | -5.8605620 | -0.9930840 | -0.3177580 | C                                                                                                                                                          | 5.7719610  | -0.7920990 | -0.3867720 |
| H                                                                                                                                                          | -5.8087230 | 0.9208740  | -1.3147630 | H                                                                                                                                                          | 5.7688040  | 1.0272860  | 0.7746840  |
| H                                                                                                                                                          | -5.5726130 | -2.8770300 | 0.6979450  | H                                                                                                                                                          | 5.4340680  | -2.5797370 | -1.5503550 |
| H                                                                                                                                                          | -6.9413250 | -1.0875260 | -0.3690690 | H                                                                                                                                                          | 6.8537750  | -0.8878110 | -0.3940940 |
| C                                                                                                                                                          | -0.6631240 | -1.6887180 | 0.0102630  | C                                                                                                                                                          | 0.5674460  | -1.4738300 | -0.5794250 |
| H                                                                                                                                                          | -0.9006560 | -2.7397650 | 0.0806110  | H                                                                                                                                                          | 0.8049910  | -2.4998550 | -0.8195180 |
| C                                                                                                                                                          | 4.4251240  | -2.7200730 | 0.2343640  | C                                                                                                                                                          | -4.5193580 | -2.5093810 | -0.7938930 |
| H                                                                                                                                                          | 5.4171650  | -3.1519100 | 0.3009220  | H                                                                                                                                                          | -5.5107220 | -2.9388870 | -0.8820660 |
| O                                                                                                                                                          | -2.0374470 | 3.1100850  | 0.3727290  | O                                                                                                                                                          | 1.9320200  | 3.3561620  | 0.0351720  |
| H                                                                                                                                                          | -1.6890500 | 2.2080390  | 0.1458860  | H                                                                                                                                                          | 1.5835210  | 2.4275850  | -0.0137100 |
| C                                                                                                                                                          | -1.9844650 | 3.2753470  | 1.7841830  | C                                                                                                                                                          | 0.7013890  | -1.4867330 | 3.5430440  |
| H                                                                                                                                                          | -0.9564070 | 3.2061610  | 2.1684580  | H                                                                                                                                                          | 0.7125580  | -1.9657030 | 4.5248410  |
| H                                                                                                                                                          | -2.3720390 | 4.2704740  | 2.0215780  | H                                                                                                                                                          | -0.2097940 | -0.8813640 | 3.4579500  |
| H                                                                                                                                                          | -2.6009110 | 2.5318850  | 2.3093600  | H                                                                                                                                                          | 1.5755850  | -0.8286750 | 3.4633310  |
|                                                                                                                                                            |            |            |            | O                                                                                                                                                          | 0.7348560  | -2.5318800 | 2.5666900  |
|                                                                                                                                                            |            |            |            | H                                                                                                                                                          | 0.7310590  | -2.1301400 | 1.6818060  |
|                                                                                                                                                            |            |            |            | C                                                                                                                                                          | 2.2744430  | 3.7842360  | -1.2773080 |
|                                                                                                                                                            |            |            |            | H                                                                                                                                                          | 1.4053710  | 3.7806730  | -1.9509090 |
|                                                                                                                                                            |            |            |            | H                                                                                                                                                          | 2.6509010  | 4.8091200  | -1.2096700 |
|                                                                                                                                                            |            |            |            | H                                                                                                                                                          | 3.0601320  | 3.1568970  | -1.7217870 |

| Complex of <b>11</b> with 3 molecules of MeOH (PCM MeCN)           |            |            |            | Complex of <b>11</b> with 4 molecules of MeOH (PCM MeCN)           |            |            |            |
|--------------------------------------------------------------------|------------|------------|------------|--------------------------------------------------------------------|------------|------------|------------|
| <b>E</b> = -1265.47639819, <b>H (0K)</b> = -1265.026861,           |            |            |            | <b>E</b> = -1381.21868249, <b>H (0K)</b> = -1380.716819,           |            |            |            |
| <b>H (298K)</b> = -1264.995398, <b>G (298K)</b> = -1265.099452 au. |            |            |            | <b>H (298K)</b> = -1380.680026, <b>G (298K)</b> = -1380.799136 au. |            |            |            |
| Imaginary frequency = 0.                                           |            |            |            | Imaginary frequency = 0.                                           |            |            |            |
| C                                                                  | -3.3458490 | -3.3283220 | 0.0587460  | C                                                                  | -2.8064480 | -3.9522060 | 1.0283680  |
| C                                                                  | -2.1290930 | -2.7053590 | 0.0687900  | C                                                                  | -1.6679520 | -3.2153120 | 0.8557880  |
| C                                                                  | -3.1484290 | -0.5203700 | 0.0418500  | C                                                                  | -2.9056650 | -1.3522930 | -0.0433010 |
| C                                                                  | -4.4016630 | -1.1712480 | 0.0320150  | C                                                                  | -4.0772120 | -2.1189870 | 0.1386490  |
| C                                                                  | -0.7452490 | -0.7567820 | 0.0722170  | C                                                                  | -0.5040740 | -1.2382280 | 0.1840300  |
| C                                                                  | -2.9954530 | 0.9236880  | 0.0341570  | C                                                                  | -2.9062180 | -0.0063920 | -0.5891020 |
| C                                                                  | -1.6972290 | 1.5235900  | 0.0458690  | C                                                                  | -1.6872700 | 0.7273610  | -0.7324120 |
| C                                                                  | -0.5695250 | 0.6458060  | 0.0698770  | C                                                                  | -0.4793980 | 0.0792300  | -0.3291630 |
| C                                                                  | -1.5777930 | 2.9346150  | 0.0374910  | C                                                                  | -1.7212960 | 2.0425400  | -1.2607970 |
| H                                                                  | -0.5871870 | 3.3759860  | 0.0355660  | H                                                                  | -0.7895970 | 2.5866530  | -1.3756350 |
| C                                                                  | -2.7038020 | 3.7349380  | 0.0206780  | C                                                                  | -2.9204250 | 2.6164700  | -1.6422130 |
| C                                                                  | -3.9896560 | 3.1525720  | 0.0106010  | C                                                                  | -4.1281040 | 1.8980540  | -1.5064780 |
| C                                                                  | -4.1298800 | 1.7780200  | 0.0163830  | C                                                                  | -4.1176770 | 0.6162700  | -0.9912950 |
| H                                                                  | -3.3835460 | -4.4109170 | 0.0657690  | H                                                                  | -2.7302370 | -4.9496680 | 1.4439110  |
| H                                                                  | -1.1955490 | -3.2474130 | 0.0833050  | H                                                                  | -0.6882350 | -3.5851670 | 1.1179510  |
| H                                                                  | -5.2982500 | -0.5685210 | 0.0176570  | H                                                                  | -5.0276860 | -1.6878280 | -0.1406040 |
| H                                                                  | -2.6002230 | 4.8159220  | 0.0136990  | H                                                                  | -2.9328050 | 3.6225380  | -2.0510580 |
| H                                                                  | -4.8730250 | 3.7828430  | -0.0028000 | H                                                                  | -5.0676390 | 2.3500090  | -1.8071530 |
| H                                                                  | -5.1304470 | 1.3648720  | 0.0069620  | H                                                                  | -5.0611410 | 0.0931180  | -0.9018450 |
| C                                                                  | 1.4251100  | -0.2374640 | 0.1159330  | C                                                                  | 1.5857950  | -0.4554770 | 0.1295310  |
| N                                                                  | 0.7543510  | 0.9562100  | 0.0975100  | N                                                                  | 0.7959100  | 0.5515460  | -0.3573800 |
| N                                                                  | -2.0159680 | -1.3312180 | 0.0603750  | N                                                                  | -1.7002990 | -1.9403850 | 0.3318380  |
| C                                                                  | 2.8958410  | -0.3062400 | 0.1741570  | C                                                                  | 3.0453110  | -0.3090120 | 0.2737150  |
| C                                                                  | 3.6572740  | 0.7898550  | 0.6239350  | C                                                                  | 3.6509110  | 0.9621720  | 0.3083210  |
| C                                                                  | 3.5793230  | -1.4795920 | -0.2029280 | C                                                                  | 3.8738760  | -1.4422930 | 0.4007060  |
| C                                                                  | 5.0496860  | 0.7139830  | 0.6922680  | C                                                                  | 5.0322770  | 1.0928750  | 0.4639990  |
| H                                                                  | 3.1518970  | 1.7008000  | 0.9241750  | H                                                                  | 3.0345850  | 1.8493700  | 0.2179770  |
| C                                                                  | 4.9708670  | -1.5551480 | -0.1306000 | C                                                                  | 5.2539060  | -1.3096880 | 0.5595300  |
| H                                                                  | 3.0208970  | -2.3355210 | -0.5693430 | H                                                                  | 3.4398580  | -2.4366890 | 0.3627810  |
| C                                                                  | 5.7151880  | -0.4580100 | 0.3170790  | C                                                                  | 5.8422840  | -0.0404890 | 0.5917430  |
| H                                                                  | 5.6157930  | 1.5716110  | 1.0450200  | H                                                                  | 5.4760050  | 2.0842350  | 0.4911560  |
| H                                                                  | 5.4745700  | -2.4694920 | -0.4312180 | H                                                                  | 5.8706160  | -2.1992030 | 0.6516150  |
| H                                                                  | 6.7983370  | -0.5157130 | 0.3713380  | H                                                                  | 6.9164760  | 0.0631020  | 0.7136290  |
| C                                                                  | 0.5388920  | -1.3406960 | 0.0970550  | C                                                                  | 0.8269440  | -1.5975270 | 0.4801880  |
| H                                                                  | 0.8076610  | -2.3867500 | 0.1309930  | H                                                                  | 1.2025030  | -2.5160310 | 0.9075110  |
| C                                                                  | -4.5164110 | -2.5448740 | 0.0398920  | C                                                                  | -4.0464160 | -3.3939900 | 0.6617470  |
| H                                                                  | -5.4946810 | -3.0117590 | 0.0316780  | H                                                                  | -4.9650600 | -3.9552290 | 0.7887980  |
| O                                                                  | 1.7794620  | 3.5119120  | -0.5213230 | C                                                                  | 2.0403930  | 2.7031450  | -2.9107040 |
| H                                                                  | 1.4515680  | 2.6019830  | -0.3027360 | H                                                                  | 2.2686000  | 3.6626150  | -3.3838280 |
| C                                                                  | 0.8267320  | -0.4827010 | 4.1853590  | H                                                                  | 1.3030150  | 2.1780660  | -3.5345620 |
| H                                                                  | 0.7919850  | -0.7622300 | 5.2408020  | H                                                                  | 2.9616420  | 2.1042650  | -2.8834370 |
| H                                                                  | 0.0433200  | 0.2609080  | 3.9927010  | O                                                                  | 1.5399820  | 2.9678370  | -1.6053660 |
| H                                                                  | 1.8049500  | -0.0340870 | 3.9725330  | H                                                                  | 1.3172130  | 2.1054570  | -1.1685280 |
| O                                                                  | 0.6174780  | -1.6793090 | 3.4291240  | C                                                                  | -1.4923940 | 4.9194960  | 1.8662730  |
| H                                                                  | 0.6494570  | -1.4598060 | 2.4839040  | H                                                                  | -1.5956220 | 5.3446430  | 2.8670140  |
| C                                                                  | 0.7879860  | -2.7397780 | -3.6688790 | H                                                                  | -1.7928710 | 5.6755760  | 1.1303050  |
| H                                                                  | 0.7467780  | -2.7636080 | -4.7602080 | H                                                                  | -0.4401750 | 4.6574010  | 1.7016280  |
| H                                                                  | 0.0048230  | -3.3994740 | -3.2743010 | O                                                                  | -2.3390130 | 3.7662260  | 1.8155190  |
| H                                                                  | 1.7673260  | -3.1155040 | -3.3467390 | H                                                                  | -2.2576620 | 3.3625010  | 0.9391100  |
| O                                                                  | 0.5854510  | -1.3806500 | -3.2724490 | C                                                                  | 0.5923600  | 0.6128580  | 4.0423940  |
| H                                                                  | 0.6182580  | -1.3336640 | -2.3030040 | H                                                                  | 0.5517340  | 0.6962340  | 5.1308310  |
| C                                                                  | 2.1644500  | 3.5393610  | -1.8907410 | H                                                                  | -0.3284930 | 1.0366490  | 3.6227950  |
| H                                                                  | 1.3225480  | 3.3093120  | -2.5591970 | H                                                                  | 1.4503190  | 1.1908010  | 3.6772230  |
| H                                                                  | 2.5182910  | 4.5487320  | -2.1199940 | O                                                                  | 0.7226340  | -0.7786060 | 3.7347990  |
| H                                                                  | 2.9787300  | 2.8318610  | -2.1018040 | H                                                                  | 0.7731560  | -0.8806300 | 2.7707970  |
|                                                                    |            |            |            | C                                                                  | 1.7011330  | -2.2971740 | -3.5610860 |

|                                                          |            |            |            |            |
|----------------------------------------------------------|------------|------------|------------|------------|
|                                                          | H          | 1.7882700  | -2.9501950 | -4.4324770 |
|                                                          | H          | 2.6925000  | -1.8905270 | -3.3260800 |
|                                                          | H          | 1.0247990  | -1.4694980 | -3.8086210 |
|                                                          | O          | 1.1897200  | -3.0960510 | -2.4898710 |
|                                                          | H          | 1.1222320  | -2.5443420 | -1.6936590 |
| Complex of <b>11</b> with 5 molecules of MeOH (PCM MeCN) |            |            |            |            |
| E = -1496.96004198, H (0K) = -1496.406448,               |            |            |            |            |
| H (298K) = -1496.363961, G (298K) = -1496.502007 au.     |            |            |            |            |
| Imaginary frequency = 0.                                 |            |            |            |            |
| C                                                        | 1.5247800  | 4.5018440  | 1.2265290  |            |
| C                                                        | 0.5697710  | 3.5372870  | 1.0632060  |            |
| C                                                        | 2.0793790  | 2.1302420  | -0.1823040 |            |
| C                                                        | 3.0606060  | 3.1303290  | -0.0094770 |            |
| C                                                        | -0.1904970 | 1.4246890  | 0.2433900  |            |
| C                                                        | 2.3170660  | 0.8897720  | -0.8993020 |            |
| C                                                        | 1.2845310  | -0.0896090 | -1.0342870 |            |
| C                                                        | 0.0177600  | 0.2068600  | -0.4447130 |            |
| C                                                        | 1.5491660  | -1.2931260 | -1.7369850 |            |
| H                                                        | 0.7519470  | -2.0209910 | -1.8489220 |            |
| C                                                        | 2.7933380  | -1.5246870 | -2.2927100 |            |
| C                                                        | 3.8182720  | -0.5606060 | -2.1683740 |            |
| C                                                        | 3.5812930  | 0.6195290  | -1.4881810 |            |
| H                                                        | 1.2753210  | 5.4020810  | 1.7749470  |            |
| H                                                        | -0.4304360 | 3.6333870  | 1.4577500  |            |
| H                                                        | 4.0431000  | 2.9713980  | -0.4297580 |            |
| H                                                        | 2.9823780  | -2.4471650 | -2.8335590 |            |
| H                                                        | 4.7907860  | -0.7381020 | -2.6163290 |            |
| H                                                        | 4.3854830  | 1.3412610  | -1.4195890 |            |
| C                                                        | -2.0482790 | 0.1868310  | 0.2566380  |            |
| N                                                        | -1.1171190 | -0.5429070 | -0.4325180 |            |
| N                                                        | 0.8265720  | 2.3699010  | 0.3762620  |            |
| C                                                        | -3.4163580 | -0.3081540 | 0.4928850  |            |
| C                                                        | -3.7332630 | -1.6737250 | 0.3565150  |            |
| C                                                        | -4.4450570 | 0.5765870  | 0.8749720  |            |
| C                                                        | -5.0299670 | -2.1344660 | 0.5924840  |            |
| H                                                        | -2.9590150 | -2.3747820 | 0.0667320  |            |
| C                                                        | -5.7395120 | 0.1138540  | 1.1139650  |            |
| H                                                        | -4.2373160 | 1.6375680  | 0.9724900  |            |
| C                                                        | -6.0406100 | -1.2454080 | 0.9734180  |            |
| H                                                        | -5.2497410 | -3.1928010 | 0.4827510  |            |
| H                                                        | -6.5151670 | 0.8172000  | 1.4032750  |            |
| H                                                        | -7.0485570 | -1.6057200 | 1.1569770  |            |
| C                                                        | -1.5236680 | 1.4245610  | 0.7009180  |            |
| H                                                        | -2.0394490 | 2.1741040  | 1.2836270  |            |
| C                                                        | 2.8056510  | 4.2978700  | 0.6777990  |            |
| H                                                        | 3.5825030  | 5.0450660  | 0.7927560  |            |
| C                                                        | -2.0622140 | -2.5105350 | -3.2444210 |            |
| H                                                        | -2.1472040 | -3.4211190 | -3.8444340 |            |
| H                                                        | -1.4596920 | -1.7826500 | -3.8065240 |            |
| H                                                        | -3.0695980 | -2.0937190 | -3.1053350 |            |
| O                                                        | -1.4557550 | -2.8590870 | -2.0051710 |            |
| H                                                        | -1.3777690 | -2.0422310 | -1.4479670 |            |
| C                                                        | 1.7114800  | -4.6604890 | 0.8372380  |            |
| H                                                        | 1.9301730  | -5.2725780 | 1.7149480  |            |
| H                                                        | 1.9627080  | -5.2344560 | -0.0633450 |            |
| H                                                        | 0.6395180  | -4.4291150 | 0.8271410  |            |
| O                                                        | 2.5077150  | -3.4758360 | 0.9488810  |            |
| H                                                        | 2.3224340  | -2.9064960 | 0.1880570  |            |
| C                                                        | 6.1162160  | -2.2176720 | 1.3065680  |            |
| H                                                        | 6.7341130  | -2.1922270 | 2.2068760  |            |
| Complex of <b>11</b> with 1 molecule of MeOH (PCM MeOH)  |            |            |            |            |
| E = -1033.98938872, H (0K) = -1033.644346,               |            |            |            |            |
| H (298K) = -1033.623437, G (298K) = -1033.697829 au.     |            |            |            |            |
| Imaginary frequency = 0.                                 |            |            |            |            |
| C                                                        | 3.3207450  | -3.5171120 | 0.2665400  |            |
| C                                                        | 2.0810600  | -2.9463400 | 0.1905580  |            |
| C                                                        | 3.0144510  | -0.7315120 | -0.0005640 |            |
| C                                                        | 4.2919950  | -1.3290800 | 0.0786040  |            |
| C                                                        | 0.6204050  | -1.0657500 | -0.0152470 |            |
| C                                                        | 2.8062430  | 0.6984890  | -0.1363480 |            |
| C                                                        | 1.4849860  | 1.2437150  | -0.2068500 |            |
| C                                                        | 0.3919670  | 0.3275460  | -0.1474610 |            |
| C                                                        | 1.3132220  | 2.6447990  | -0.3373830 |            |
| H                                                        | 0.3061700  | 3.0455450  | -0.3799100 |            |
| C                                                        | 2.4072000  | 3.4852430  | -0.3993040 |            |
| C                                                        | 3.7151300  | 2.9562810  | -0.3326050 |            |
| C                                                        | 3.9070520  | 1.5943170  | -0.2034080 |            |
| H                                                        | 3.3999800  | -4.5925680 | 0.3701120  |            |
| H                                                        | 1.1690340  | -3.5225750 | 0.2303950  |            |
| H                                                        | 5.1642650  | -0.6928890 | 0.0354210  |            |
| H                                                        | 2.2623860  | 4.5569780  | -0.4988380 |            |
| H                                                        | 4.5738730  | 3.6180650  | -0.3819850 |            |
| H                                                        | 4.9227680  | 1.2226080  | -0.1546900 |            |
| C                                                        | -1.5606190 | -0.6414770 | -0.1145240 |            |
| N                                                        | -0.9405720 | 0.5808110  | -0.2084240 |            |
| N                                                        | 1.9131440  | -1.5836590 | 0.0584150  |            |
| C                                                        | -3.0261210 | -0.7743370 | -0.1679970 |            |
| C                                                        | -3.8281350 | 0.2319300  | -0.7414040 |            |
| C                                                        | -3.6674520 | -1.9225910 | 0.3398850  |            |
| C                                                        | -5.2162820 | 0.0950310  | -0.8028310 |            |
| H                                                        | -3.3555140 | 1.1207400  | -1.1437300 |            |
| C                                                        | -5.0546680 | -2.0604480 | 0.2736070  |            |
| H                                                        | -3.0777080 | -2.7067810 | 0.8049210  |            |
| C                                                        | -5.8387690 | -1.0516190 | -0.2976190 |            |
| H                                                        | -5.8128040 | 0.8843390  | -1.2521180 |            |
| H                                                        | -5.5246640 | -2.9534880 | 0.6761130  |            |
| H                                                        | -6.9185680 | -1.1575110 | -0.3469000 |            |
| C                                                        | -0.6349190 | -1.6964940 | 0.0091410  |            |
| H                                                        | -0.8630150 | -2.7502840 | 0.0682160  |            |
| C                                                        | 4.4607810  | -2.6907410 | 0.2090320  |            |
| H                                                        | 5.4562440  | -3.1158970 | 0.2669700  |            |
| O                                                        | -2.0614170 | 3.1189460  | 0.2440620  |            |
| H                                                        | -1.6998990 | 2.2085130  | 0.0781940  |            |
| C                                                        | -2.2324840 | 3.2907310  | 1.6452140  |            |
| H                                                        | -1.2822460 | 3.1964010  | 2.1906750  |            |
| H                                                        | -2.6261890 | 4.2970720  | 1.8159620  |            |
| H                                                        | -2.9455280 | 2.5665960  | 2.0645430  |            |

|                                                                                                                                                            |            |            |            |                                                                                                                                                            |            |            |            |
|------------------------------------------------------------------------------------------------------------------------------------------------------------|------------|------------|------------|------------------------------------------------------------------------------------------------------------------------------------------------------------|------------|------------|------------|
| H                                                                                                                                                          | 6.7123980  | -2.6308770 | 0.4831590  |                                                                                                                                                            |            |            |            |
| H                                                                                                                                                          | 5.2502260  | -2.8651500 | 1.4853930  |                                                                                                                                                            |            |            |            |
| O                                                                                                                                                          | 5.7162640  | -0.8673560 | 1.0408010  |                                                                                                                                                            |            |            |            |
| H                                                                                                                                                          | 5.1283560  | -0.8653810 | 0.2722110  |                                                                                                                                                            |            |            |            |
| C                                                                                                                                                          | -0.6402940 | -1.1521000 | 3.8873880  |                                                                                                                                                            |            |            |            |
| H                                                                                                                                                          | -0.3680700 | -1.3484610 | 4.9269300  |                                                                                                                                                            |            |            |            |
| H                                                                                                                                                          | 0.1542020  | -1.5380000 | 3.2368290  |                                                                                                                                                            |            |            |            |
| H                                                                                                                                                          | -1.5747090 | -1.6813110 | 3.6627250  |                                                                                                                                                            |            |            |            |
| O                                                                                                                                                          | -0.7900560 | 0.2649100  | 3.7554410  |                                                                                                                                                            |            |            |            |
| H                                                                                                                                                          | -1.0224540 | 0.4687910  | 2.8351640  |                                                                                                                                                            |            |            |            |
| C                                                                                                                                                          | -2.9217250 | 2.4675470  | -3.1200290 |                                                                                                                                                            |            |            |            |
| H                                                                                                                                                          | -3.1823590 | 3.1997660  | -3.8876500 |                                                                                                                                                            |            |            |            |
| H                                                                                                                                                          | -3.7988660 | 1.8391930  | -2.9216900 |                                                                                                                                                            |            |            |            |
| H                                                                                                                                                          | -2.1079980 | 1.8363190  | -3.4981550 |                                                                                                                                                            |            |            |            |
| O                                                                                                                                                          | -2.5244730 | 3.2035200  | -1.9590180 |                                                                                                                                                            |            |            |            |
| H                                                                                                                                                          | -2.2801720 | 2.5756780  | -1.2599400 |                                                                                                                                                            |            |            |            |
| Complex of <b>11</b> with 2 molecules of MeOH (PCM MeOH)                                                                                                   |            |            |            | Complex of <b>11</b> with 3 molecules of MeOH (PCM MeOH)                                                                                                   |            |            |            |
| <b>E</b> = -1149.73318514, <b>H (0K)</b> = -1149.335732,<br><b>H (298K)</b> = -1149.309645, <b>G (298K)</b> = -1149.398311 au.<br>Imaginary frequency = 0. |            |            |            | <b>E</b> = -1265.47625673, <b>H (0K)</b> = -1265.026713,<br><b>H (298K)</b> = -1264.995254, <b>G (298K)</b> = -1265.099270 au.<br>Imaginary frequency = 0. |            |            |            |
| C                                                                                                                                                          | -3.3722730 | -3.3011080 | -0.9938160 | C                                                                                                                                                          | -3.3457650 | -3.3284560 | 0.0580750  |
| C                                                                                                                                                          | -2.1379310 | -2.7263390 | -0.8731350 | C                                                                                                                                                          | -2.1290630 | -2.7054260 | 0.0683170  |
| C                                                                                                                                                          | -3.0929100 | -0.5727370 | -0.3600670 | C                                                                                                                                                          | -3.1485110 | -0.5204660 | 0.0413790  |
| C                                                                                                                                                          | -4.3646480 | -1.1742810 | -0.4852040 | C                                                                                                                                                          | -4.4017060 | -1.1714610 | 0.0313570  |
| C                                                                                                                                                          | -0.6966480 | -0.8680680 | -0.4464430 | C                                                                                                                                                          | -0.7453240 | -0.7567790 | 0.0718270  |
| C                                                                                                                                                          | -2.8980890 | 0.8300110  | -0.0405730 | C                                                                                                                                                          | -2.9956270 | 0.9235690  | 0.0339390  |
| C                                                                                                                                                          | -1.5825690 | 1.3810860  | 0.0717050  | C                                                                                                                                                          | -1.6974310 | 1.5235470  | 0.0460580  |
| C                                                                                                                                                          | -0.4802220 | 0.4964130  | -0.1369740 | C                                                                                                                                                          | -0.5696870 | 0.6458520  | 0.0699460  |
| C                                                                                                                                                          | -1.4242450 | 2.7545480  | 0.3818910  | C                                                                                                                                                          | -1.5780580 | 2.9345890  | 0.0381220  |
| H                                                                                                                                                          | -0.4218880 | 3.1620030  | 0.4570340  | H                                                                                                                                                          | -0.5874730 | 3.3760080  | 0.0365290  |
| C                                                                                                                                                          | -2.5269480 | 3.5631280  | 0.5773270  | C                                                                                                                                                          | -2.7040930 | 3.7348420  | 0.0212740  |
| C                                                                                                                                                          | -3.8291540 | 3.0283200  | 0.4697020  | C                                                                                                                                                          | -3.9899280 | 3.1524150  | 0.0106920  |
| C                                                                                                                                                          | -4.0078130 | 1.6922560  | 0.1668870  | C                                                                                                                                                          | -4.1300960 | 1.7778760  | 0.0160780  |
| H                                                                                                                                                          | -3.4413570 | -4.3536160 | -1.2407470 | H                                                                                                                                                          | -3.3834050 | -4.4110550 | 0.0650980  |
| H                                                                                                                                                          | -1.2206330 | -3.2775490 | -1.0149580 | H                                                                                                                                                          | -1.1954860 | -3.2474180 | 0.0830740  |
| H                                                                                                                                                          | -5.2432800 | -0.5641900 | -0.3329150 | H                                                                                                                                                          | -5.2983180 | -0.5687710 | 0.0170000  |
| H                                                                                                                                                          | -2.3925680 | 4.6144750  | 0.8140690  | H                                                                                                                                                          | -2.6005630 | 4.8158320  | 0.0146320  |
| H                                                                                                                                                          | -4.6944080 | 3.6650820  | 0.6235070  | H                                                                                                                                                          | -4.8733150 | 3.7826630  | -0.0027960 |
| H                                                                                                                                                          | -5.0197890 | 1.3153760  | 0.0906070  | H                                                                                                                                                          | -5.1306410 | 1.3646860  | 0.0062470  |
| C                                                                                                                                                          | 1.4853880  | -0.4259820 | -0.3492960 | C                                                                                                                                                          | 1.4249870  | -0.2372600 | 0.1158310  |
| N                                                                                                                                                          | 0.8518530  | 0.7598620  | -0.0773870 | N                                                                                                                                                          | 0.7541380  | 0.9563350  | 0.0977850  |
| N                                                                                                                                                          | -1.9840050 | -1.3919880 | -0.5605010 | N                                                                                                                                                          | -2.0159810 | -1.3312570 | 0.0599230  |
| C                                                                                                                                                          | 2.9541760  | -0.5417770 | -0.3680040 | C                                                                                                                                                          | 2.8957250  | -0.3058360 | 0.1741860  |
| C                                                                                                                                                          | 3.7703430  | 0.4074420  | 0.2778490  | C                                                                                                                                                          | 3.6568690  | 0.7902750  | 0.6244210  |
| C                                                                                                                                                          | 3.5834450  | -1.6185800 | -1.0252270 | C                                                                                                                                                          | 3.5794750  | -1.4789100 | -0.2032120 |
| C                                                                                                                                                          | 5.1609960  | 0.2831420  | 0.2661510  | C                                                                                                                                                          | 5.0492750  | 0.7146370  | 0.6929280  |
| H                                                                                                                                                          | 3.3100140  | 1.2430540  | 0.7926340  | H                                                                                                                                                          | 3.1512620  | 1.7010250  | 0.9248620  |
| C                                                                                                                                                          | 4.9733430  | -1.7435220 | -1.0327140 | C                                                                                                                                                          | 4.9710200  | -1.5542290 | -0.1307160 |
| H                                                                                                                                                          | 2.9826560  | -2.3563910 | -1.5480790 | H                                                                                                                                                          | 3.0212680  | -2.3347970 | -0.5700590 |
| C                                                                                                                                                          | 5.7717140  | -0.7927440 | -0.3869820 | C                                                                                                                                                          | 5.7150510  | -0.4571070 | 0.3174580  |
| H                                                                                                                                                          | 5.7688250  | 1.0270460  | 0.7738380  | H                                                                                                                                                          | 5.6151680  | 1.5722650  | 1.0460220  |
| H                                                                                                                                                          | 5.4335760  | -2.5807360 | -1.5499400 | H                                                                                                                                                          | 5.4749500  | -2.4683620 | -0.4315960 |
| H                                                                                                                                                          | 6.8535180  | -0.8885870 | -0.3943200 | H                                                                                                                                                          | 6.7982050  | -0.5146160 | 0.3718520  |
| C                                                                                                                                                          | 0.5671320  | -1.4738770 | -0.5794810 | C                                                                                                                                                          | 0.5388540  | -1.3405850 | 0.0965200  |
| H                                                                                                                                                          | 0.8045620  | -2.4999660 | -0.8194090 | H                                                                                                                                                          | 0.8077370  | -2.3866130 | 0.1303940  |
| C                                                                                                                                                          | -4.5198680 | -2.5086000 | -0.7939860 | C                                                                                                                                                          | -4.5163890 | -2.5450770 | 0.0390930  |
| H                                                                                                                                                          | -5.5113030 | -2.9379540 | -0.8821410 | H                                                                                                                                                          | -5.4946270 | -3.0120300 | 0.0307240  |
| O                                                                                                                                                          | 1.9323160  | 3.3560790  | 0.0356130  | O                                                                                                                                                          | 1.7786280  | 3.5126030  | -0.5204310 |
| H                                                                                                                                                          | 1.5837410  | 2.4275690  | -0.0134450 | H                                                                                                                                                          | 1.4511110  | 2.6024990  | -0.3021350 |
| C                                                                                                                                                          | 0.7040060  | -1.4877980 | 3.5436880  | C                                                                                                                                                          | 0.8279220  | -0.4857250 | 4.1861520  |

|                                                                                                                                |            |            |            |                                                                                                                                |            |            |            |
|--------------------------------------------------------------------------------------------------------------------------------|------------|------------|------------|--------------------------------------------------------------------------------------------------------------------------------|------------|------------|------------|
| H                                                                                                                              | 0.7118590  | -1.9676810 | 4.5250750  | H                                                                                                                              | 0.7888220  | -0.7660130 | 5.2412450  |
| H                                                                                                                              | -0.2028030 | -0.8757980 | 3.4592460  | H                                                                                                                              | 0.0488330  | 0.2620360  | 3.9920130  |
| H                                                                                                                              | 1.5828960  | -0.8359760 | 3.4644040  | H                                                                                                                              | 1.8089830  | -0.0418650 | 3.9764600  |
| O                                                                                                                              | 0.7298150  | -2.5323410 | 2.5664810  | O                                                                                                                              | 0.6147160  | -1.6805720 | 3.4282660  |
| H                                                                                                                              | 0.7287600  | -2.1298940 | 1.6819160  | H                                                                                                                              | 0.6505470  | -1.4604010 | 2.4833480  |
| C                                                                                                                              | 2.2774430  | 3.7833130  | -1.2764010 | C                                                                                                                              | 0.7938610  | -2.7391740 | -3.6688930 |
| H                                                                                                                              | 1.4095110  | 3.7805450  | -1.9514940 | H                                                                                                                              | 0.7490080  | -2.7643760 | -4.7600500 |
| H                                                                                                                              | 2.6549810  | 4.8077830  | -1.2084480 | H                                                                                                                              | 0.0171230  | -3.4045010 | -3.2710220 |
| H                                                                                                                              | 3.0631530  | 3.1549200  | -1.7193540 | H                                                                                                                              | 1.7771550  | -3.1072220 | -3.3499060 |
|                                                                                                                                |            |            |            | O                                                                                                                              | 0.5823810  | -1.3813200 | -3.2730440 |
|                                                                                                                                |            |            |            | H                                                                                                                              | 0.6178940  | -1.3331360 | -2.3037610 |
|                                                                                                                                |            |            |            | C                                                                                                                              | 2.1642220  | 3.5404550  | -1.8896480 |
|                                                                                                                                |            |            |            | H                                                                                                                              | 1.3227700  | 3.3100130  | -2.5585400 |
|                                                                                                                                |            |            |            | H                                                                                                                              | 2.5175910  | 4.5500690  | -2.1185810 |
|                                                                                                                                |            |            |            | H                                                                                                                              | 2.9790040  | 2.8334510  | -2.1004460 |
| Complex of <b>11</b> with 4 molecules of MeOH (PCM MeOH)                                                                       |            |            |            | Complex of <b>11</b> with 5 molecules of MeOH (PCM MeOH)                                                                       |            |            |            |
| E = -1381.21855240, H (0K) = -1380.716700,<br>H (298K) = -1380.679894, G (298K) = -1380.799179 au.<br>Imaginary frequency = 0. |            |            |            | E = -1496.95995619, H (0K) = -1496.406503,<br>H (298K) = -1496.363946, G (298K) = -1496.502995 au.<br>Imaginary frequency = 0. |            |            |            |
| C                                                                                                                              | -2.8050440 | -3.9528600 | 1.0273190  | C                                                                                                                              | 1.4142350  | 4.5250180  | 1.1470540  |
| C                                                                                                                              | -1.6667300 | -3.2156100 | 0.8551190  | C                                                                                                                              | 0.4685260  | 3.5487220  | 1.0000870  |
| C                                                                                                                              | -2.9047950 | -1.3527460 | -0.0438520 | C                                                                                                                              | 2.0012470  | 2.1223670  | -0.1946360 |
| C                                                                                                                              | -4.0761520 | -2.1198320 | 0.1377180  | C                                                                                                                              | 2.9727580  | 3.1345250  | -0.0382900 |
| C                                                                                                                              | -0.5032680 | -1.2380730 | 0.1840150  | C                                                                                                                              | -0.2665350 | 1.4085050  | 0.2299830  |
| C                                                                                                                              | -2.9056380 | -0.0067420 | -0.5893320 | C                                                                                                                              | 2.2556700  | 0.8669500  | -0.8790940 |
| C                                                                                                                              | -1.6868720 | 0.7274140  | -0.7321200 | C                                                                                                                              | 1.2315290  | -0.1227830 | -1.0002000 |
| C                                                                                                                              | -0.4788960 | 0.0795170  | -0.3289100 | C                                                                                                                              | -0.0409640 | 0.1753490  | -0.4246280 |
| C                                                                                                                              | -1.7211210 | 2.0428290  | -1.2599080 | C                                                                                                                              | 1.5093360  | -1.3389640 | -1.6753120 |
| H                                                                                                                              | -0.7895180 | 2.5871800  | -1.3742130 | H                                                                                                                              | 0.7172120  | -2.0736200 | -1.7783810 |
| C                                                                                                                              | -2.9203060 | 2.6165490  | -1.6414060 | C                                                                                                                              | 2.7595100  | -1.5739160 | -2.2160590 |
| C                                                                                                                              | -4.1278070 | 1.8976750  | -1.5063780 | C                                                                                                                              | 3.7773850  | -0.6008690 | -2.1026110 |
| C                                                                                                                              | -4.1171650 | 0.6157050  | -0.9916810 | C                                                                                                                              | 3.5271330  | 0.5919030  | -1.4500970 |
| H                                                                                                                              | -2.7286280 | -4.9503870 | 1.4426750  | H                                                                                                                              | 1.1524410  | 5.4371360  | 1.6694640  |
| H                                                                                                                              | -0.6869480 | -3.5852320 | 1.1173800  | H                                                                                                                              | -0.5357790 | 3.6462340  | 1.3837700  |
| H                                                                                                                              | -5.0266870 | -1.6888550 | -0.1416190 | H                                                                                                                              | 3.9602030  | 2.9729400  | -0.4457190 |
| H                                                                                                                              | -2.9328980 | 3.6228220  | -2.0497400 | H                                                                                                                              | 2.9586280  | -2.5057760 | -2.7368980 |
| H                                                                                                                              | -5.0673840 | 2.3494740  | -1.8071600 | H                                                                                                                              | 4.7547140  | -0.7815480 | -2.5386640 |
| H                                                                                                                              | -5.0605020 | 0.0922350  | -0.9027230 | H                                                                                                                              | 4.3263810  | 1.3198860  | -1.3900070 |
| C                                                                                                                              | 1.5863560  | -0.4546250 | 0.1299890  | C                                                                                                                              | -2.1087800 | 0.1488090  | 0.2688850  |
| N                                                                                                                              | 0.7962340  | 0.5522140  | -0.3568730 | N                                                                                                                              | -1.1664410 | -0.5877430 | -0.3967170 |
| N                                                                                                                              | -1.6993150 | -1.9405700 | 0.3314320  | N                                                                                                                              | 0.7410990  | 2.3660480  | 0.3459400  |
| C                                                                                                                              | 3.0457940  | -0.3077030 | 0.2743490  | C                                                                                                                              | -3.4676640 | -0.3628780 | 0.5200400  |
| C                                                                                                                              | 3.6508900  | 0.9636970  | 0.3095580  | C                                                                                                                              | -3.7465540 | -1.7422660 | 0.4673630  |
| C                                                                                                                              | 3.8747580  | -1.4407330 | 0.4008690  | C                                                                                                                              | -4.5222200 | 0.5165020  | 0.8374610  |
| C                                                                                                                              | 5.0321920  | 1.0948380  | 0.4653640  | C                                                                                                                              | -5.0327880 | -2.2224230 | 0.7207930  |
| H                                                                                                                              | 3.0342220  | 1.8506970  | 0.2196070  | H                                                                                                                              | -2.9491690 | -2.4377790 | 0.2319010  |
| C                                                                                                                              | 5.2547260  | -1.3076870 | 0.5598180  | C                                                                                                                              | -5.8064420 | 0.0346710  | 1.0941950  |
| H                                                                                                                              | 3.4410860  | -2.4352620 | 0.3624410  | H                                                                                                                              | -4.3418670 | 1.5865510  | 0.8707590  |
| C                                                                                                                              | 5.8426090  | -0.0382820 | 0.5926370  | C                                                                                                                              | -6.0699980 | -1.3383850 | 1.0366550  |
| H                                                                                                                              | 5.4755470  | 2.0863520  | 0.4929860  | H                                                                                                                              | -5.2234410 | -3.2911080 | 0.6768690  |
| H                                                                                                                              | 5.8717700  | -2.1970090 | 0.6515330  | H                                                                                                                              | -6.6033470 | 0.7332920  | 1.3327500  |
| H                                                                                                                              | 6.9167560  | 0.0656600  | 0.7146290  | H                                                                                                                              | -7.0697960 | -1.7134430 | 1.2346630  |
| C                                                                                                                              | 0.8278230  | -1.5970020 | 0.4803150  | C                                                                                                                              | -1.6026330 | 1.4052450  | 0.6802230  |
| H                                                                                                                              | 1.2035930  | -2.5153140 | 0.9078720  | H                                                                                                                              | -2.1315660 | 2.1629010  | 1.2404070  |
| C                                                                                                                              | -4.0451100 | -3.3949250 | 0.6605660  | C                                                                                                                              | 2.7019490  | 4.3173840  | 0.6158780  |
| H                                                                                                                              | -4.9636220 | -3.9564480 | 0.7873320  | H                                                                                                                              | 3.4715770  | 5.0737950  | 0.7184600  |
| C                                                                                                                              | 2.0402690  | 2.7020800  | -2.9118200 | C                                                                                                                              | -2.0865300 | -2.5109620 | -3.2416640 |
| H                                                                                                                              | 2.2678760  | 3.6610900  | -3.3861660 | H                                                                                                                              | -2.1597230 | -3.4086760 | -3.8622990 |
| H                                                                                                                              | 1.3029820  | 2.1758820  | -3.5348480 | H                                                                                                                              | -1.4648460 | -1.7753400 | -3.7718880 |
| H                                                                                                                              | 2.9618190  | 2.1036870  | -2.8840520 | H                                                                                                                              | -3.0952470 | -2.0913210 | -3.1219500 |

|                                                      |            |            |            |   |            |            |            |
|------------------------------------------------------|------------|------------|------------|---|------------|------------|------------|
| O                                                    | 1.5400680  | 2.9681400  | -1.6066850 | O | -1.5160980 | -2.8880160 | -1.9938010 |
| H                                                    | 1.3175720  | 2.1061930  | -1.1689690 | H | -1.4369920 | -2.0805970 | -1.4236010 |
| C                                                    | -1.4934560 | 4.9186320  | 1.8630680  | C | 1.7677440  | -4.5735270 | 1.0240800  |
| H                                                    | -1.6012720 | 5.3521190  | 2.8597450  | H | 2.0251500  | -5.1472740 | 1.9170510  |
| H                                                    | -1.7855100 | 5.6703370  | 1.1192610  | H | 1.9405970  | -5.2009790 | 0.1409180  |
| H                                                    | -0.4413990 | 4.6503830  | 1.7074920  | H | 0.7052830  | -4.3058710 | 1.0712030  |
| O                                                    | -2.3451010 | 3.7690000  | 1.8157920  | O | 2.6058430  | -3.4128020 | 1.0205850  |
| H                                                    | -2.2615640 | 3.3590890  | 0.9424670  | H | 2.3878490  | -2.8768880 | 0.2442800  |
| C                                                    | 0.5933300  | 0.6111510  | 4.0445930  | C | 6.6738640  | -2.0002510 | 1.0080910  |
| H                                                    | 0.5479920  | 0.6928930  | 5.1329700  | H | 7.4887620  | -1.8730570 | 1.7239530  |
| H                                                    | -0.3226000 | 1.0418790  | 3.6212960  | H | 7.0983050  | -2.2939470 | 0.0401080  |
| H                                                    | 1.4569140  | 1.1839580  | 3.6846140  | H | 6.0106240  | -2.7967610 | 1.3662760  |
| O                                                    | 0.7157260  | -0.7806080 | 3.7351620  | O | 5.9938160  | -0.7426320 | 0.9271850  |
| H                                                    | 0.7697670  | -0.8813220 | 2.7712220  | H | 5.2673970  | -0.8232460 | 0.2932550  |
| C                                                    | 1.7022400  | -2.2996720 | -3.5609870 | C | -0.2770670 | -0.9284810 | 3.8727820  |
| H                                                    | 1.7880860  | -2.9534430 | -4.4319480 | H | -0.0671100 | -1.1115860 | 4.9290390  |
| H                                                    | 2.6944440  | -1.8949600 | -3.3261480 | H | 0.6705010  | -0.9336210 | 3.3199800  |
| H                                                    | 1.0277110  | -1.4707020 | -3.8091620 | H | -0.9150940 | -1.7374040 | 3.4958530  |
| O                                                    | 1.1890080  | -3.0967410 | -2.4893460 | O | -0.9303830 | 0.3420370  | 3.7908030  |
| H                                                    | 1.1225910  | -2.5443980 | -1.6934950 | H | -1.1286630 | 0.5290290  | 2.8591270  |
|                                                      |            |            |            | C | -2.9767240 | 2.3557560  | -3.1801930 |
|                                                      |            |            |            | H | -3.2635510 | 3.0716210  | -3.9538610 |
|                                                      |            |            |            | H | -3.8317270 | 1.7001850  | -2.9736230 |
|                                                      |            |            |            | H | -2.1431810 | 1.7486380  | -3.5546950 |
|                                                      |            |            |            | O | -2.6015790 | 3.1153190  | -2.0271030 |
|                                                      |            |            |            | H | -2.3458440 | 2.5022430  | -1.3191330 |
| Complex of <b>11</b> with formic acid (PCM MeCN)     |            |            |            |   |            |            |            |
| E = -1108.04750210, H (0K) = -1107.719995,           |            |            |            |   |            |            |            |
| H (298K) = -1107.699192, G (298K) = -1107.771786 au. |            |            |            |   |            |            |            |
| Imaginary frequency = 0.                             |            |            |            |   |            |            |            |
| C                                                    | -3.6629650 | -3.3967530 | 0.3175590  |   |            |            |            |
| C                                                    | -2.3892750 | -2.9077410 | 0.2261070  |   |            |            |            |
| C                                                    | -3.1800510 | -0.6368300 | 0.0602920  |   |            |            |            |
| C                                                    | -4.4921770 | -1.1476520 | 0.1565060  |   |            |            |            |
| C                                                    | -0.8139750 | -1.1246850 | 0.0138330  |   |            |            |            |
| C                                                    | -2.8824190 | 0.7790170  | -0.0755920 |   |            |            |            |
| C                                                    | -1.5321170 | 1.2391680  | -0.1593330 |   |            |            |            |
| C                                                    | -0.5186920 | 0.2392050  | -0.0998910 |   |            |            |            |
| C                                                    | -1.2599150 | 2.6203730  | -0.2952250 |   |            |            |            |
| H                                                    | -0.2283820 | 2.9502630  | -0.3688900 |   |            |            |            |
| C                                                    | -2.2987750 | 3.5311100  | -0.3430550 |   |            |            |            |
| C                                                    | -3.6357500 | 3.0907420  | -0.2590280 |   |            |            |            |
| C                                                    | -3.9205160 | 1.7440660  | -0.1294270 |   |            |            |            |
| H                                                    | -3.8116120 | -4.4650520 | 0.4154500  |   |            |            |            |
| H                                                    | -1.5177110 | -3.5439280 | 0.2482520  |   |            |            |            |
| H                                                    | -5.3217110 | -0.4563290 | 0.1309660  |   |            |            |            |
| H                                                    | -2.0840940 | 4.5901390  | -0.4476980 |   |            |            |            |
| H                                                    | -4.4481090 | 3.8090070  | -0.2977200 |   |            |            |            |
| H                                                    | -4.9583320 | 1.4424870  | -0.0713680 |   |            |            |            |
| C                                                    | 1.4118810  | -0.8969340 | -0.0742130 |   |            |            |            |
| N                                                    | 0.8420930  | 0.3584940  | -0.1452820 |   |            |            |            |
| N                                                    | -2.1396640 | -1.5594620 | 0.1003710  |   |            |            |            |
| C                                                    | 2.8635200  | -1.1173360 | -0.0907370 |   |            |            |            |
| C                                                    | 3.7618810  | -0.1308450 | 0.3590940  |   |            |            |            |
| C                                                    | 3.3793130  | -2.3467950 | -0.5458990 |   |            |            |            |
| C                                                    | 5.1371430  | -0.3746100 | 0.3503700  |   |            |            |            |
| H                                                    | 3.3925910  | 0.8210920  | 0.7296830  |   |            |            |            |
| C                                                    | 4.7534080  | -2.5857980 | -0.5463110 |   |            |            |            |
| H                                                    | 2.7035220  | -3.1108970 | -0.9173140 |   |            |            |            |
| C                                                    | 5.6399070  | -1.5996190 | -0.0991320 |   |            |            |            |
| H                                                    | 5.8169790  | 0.3951620  | 0.7041710  |   |            |            |            |



|   |            |            |            |
|---|------------|------------|------------|
| H | 5.1322220  | -3.5383390 | -0.9050910 |
| H | 6.7100610  | -1.7842270 | -0.1026590 |
| C | 0.3992210  | -1.8487060 | 0.0275480  |
| H | 0.5503850  | -2.9116090 | 0.1309750  |
| C | -4.7447410 | -2.4969630 | 0.2828350  |
| H | -5.7648180 | -2.8565690 | 0.3545580  |
| H | 1.3593970  | 1.2653650  | -0.2802410 |
| C | 2.7162430  | 3.4284440  | 0.1806830  |
| O | 2.9738150  | 3.1172920  | 1.3668290  |
| O | 2.0309270  | 2.7630730  | -0.6609360 |
| H | 3.1277710  | 4.3921530  | -0.1977380 |
